# Supplementary material for: SFN Enhanced the Radiosensitivity of Cervical Cancer Cells via Activating LATS2 and Blocking Rad51/MDC1 Recruitment to DNA Damage Site
Source: MDPI journal article supplement (doi:10.3390/cancers14081872), 2022-04-08
Supplement: s1 [file s1]

## Supplementary Material: SFN Enhanced the Radiosensitivity of Cervical Cancer Cells via Activating LATS2 and Blocking Rad51/MDC1 Recruitment to DNA Damage Site

Shiyu Wang, Yanan Wang, Xiangnan Liu, Yongbin Yang, Sufang Wu and Yuan Liu

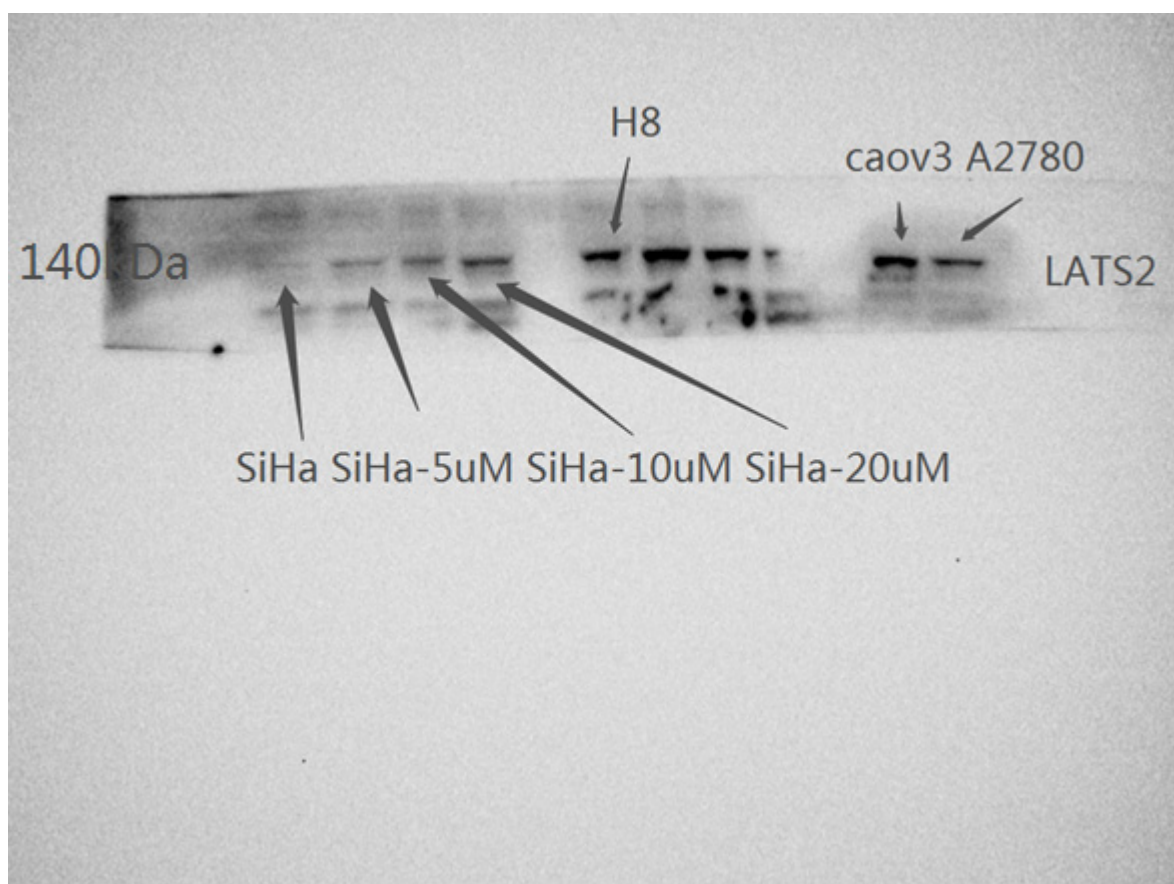

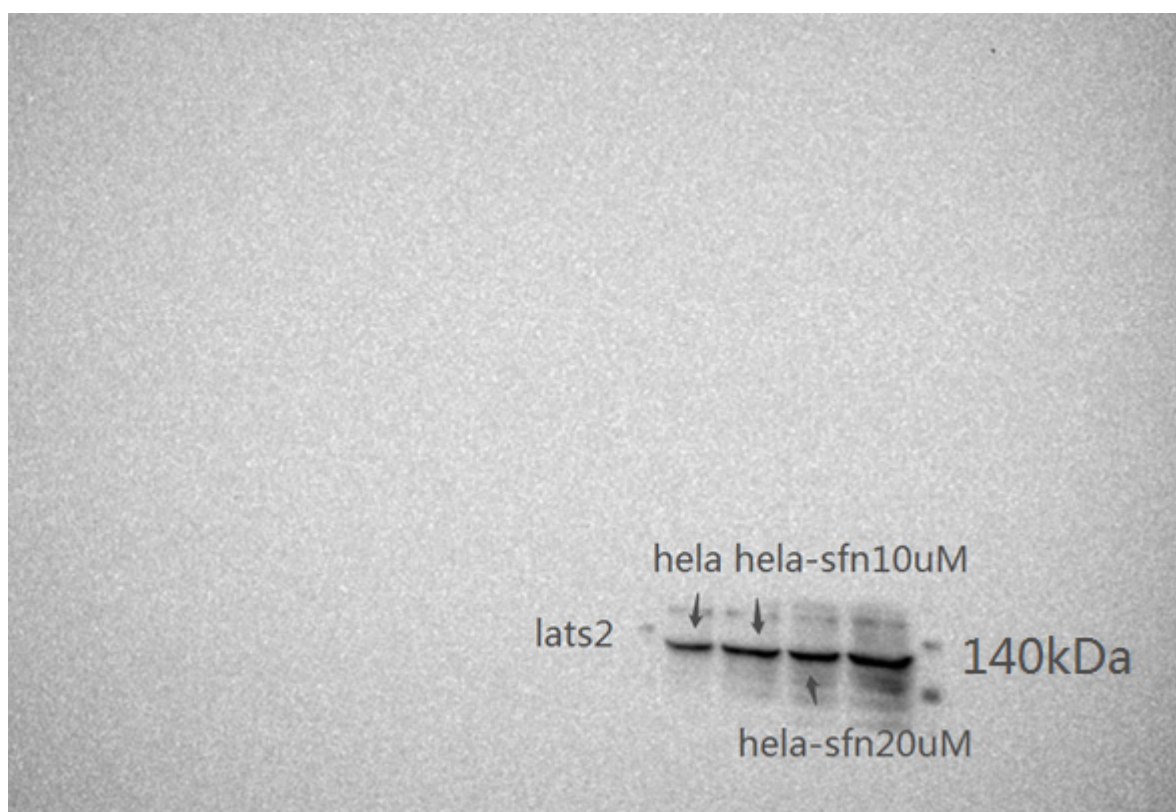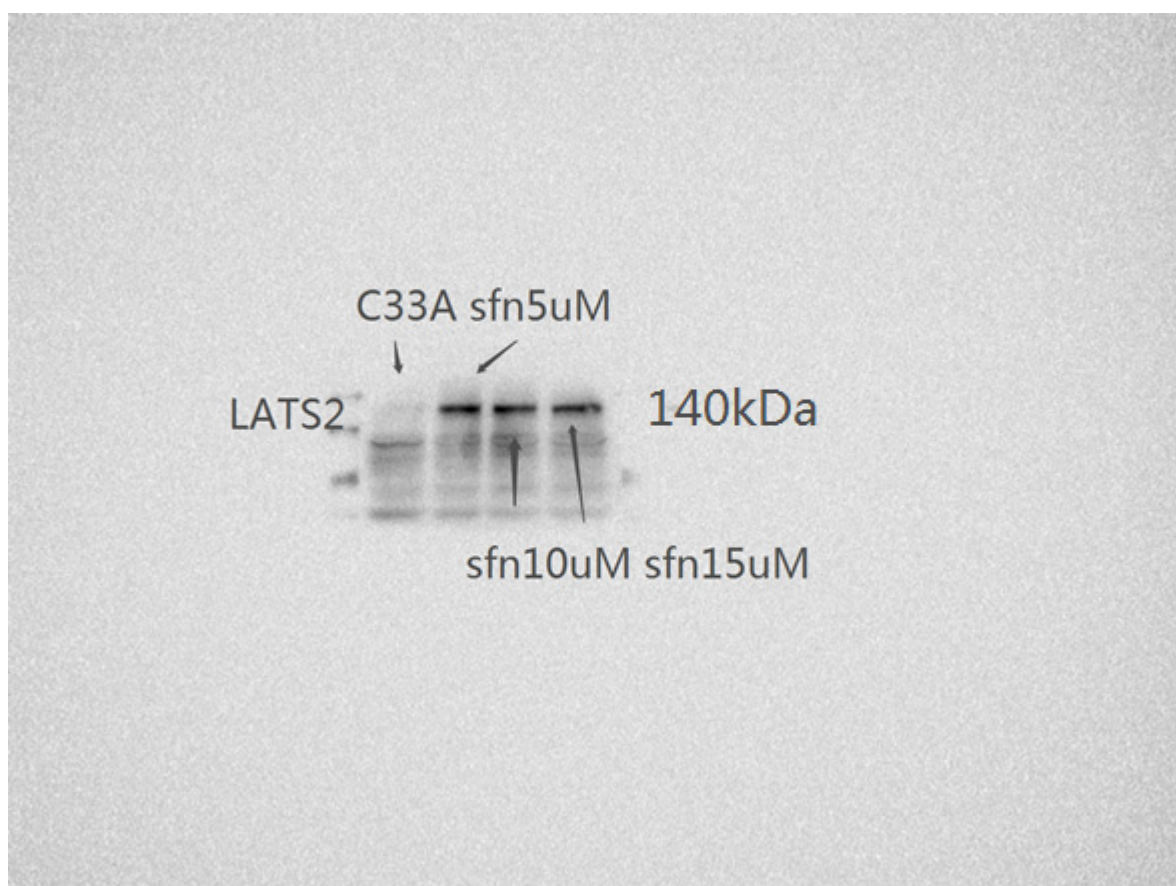

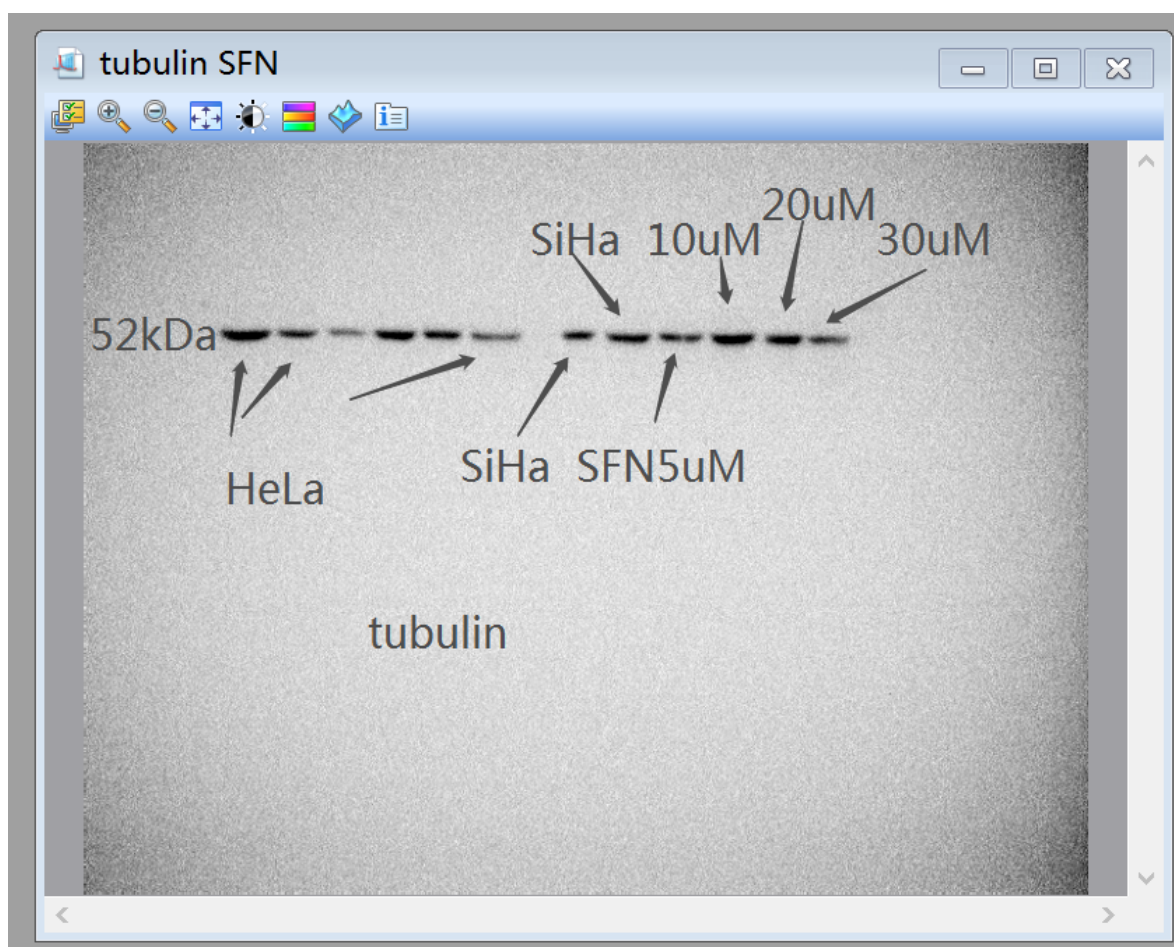



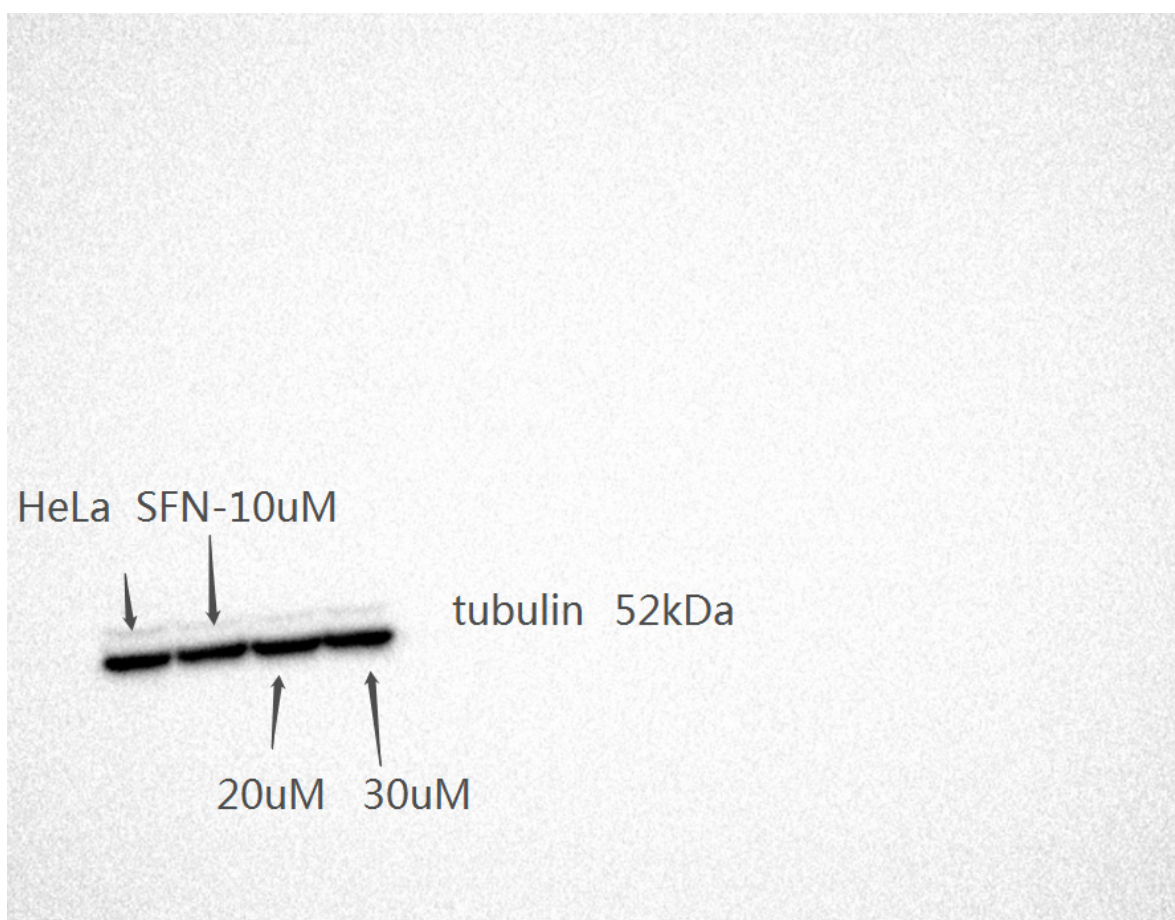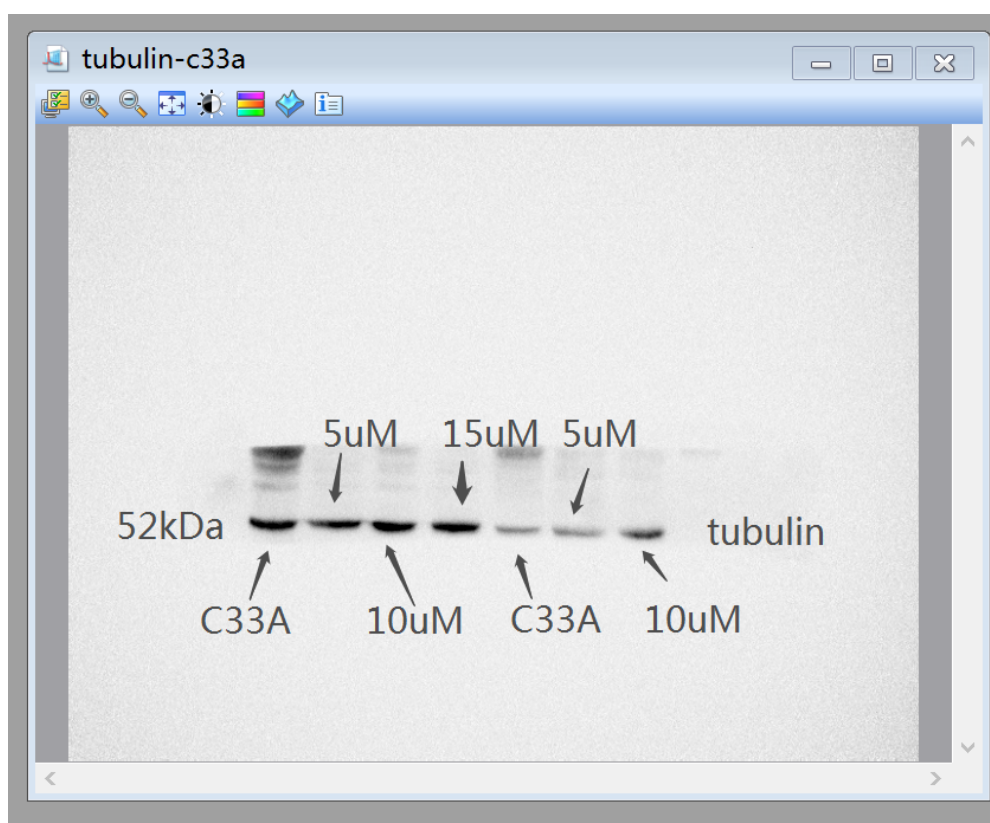

**Figure S1.** The original western blot for figures 1D.

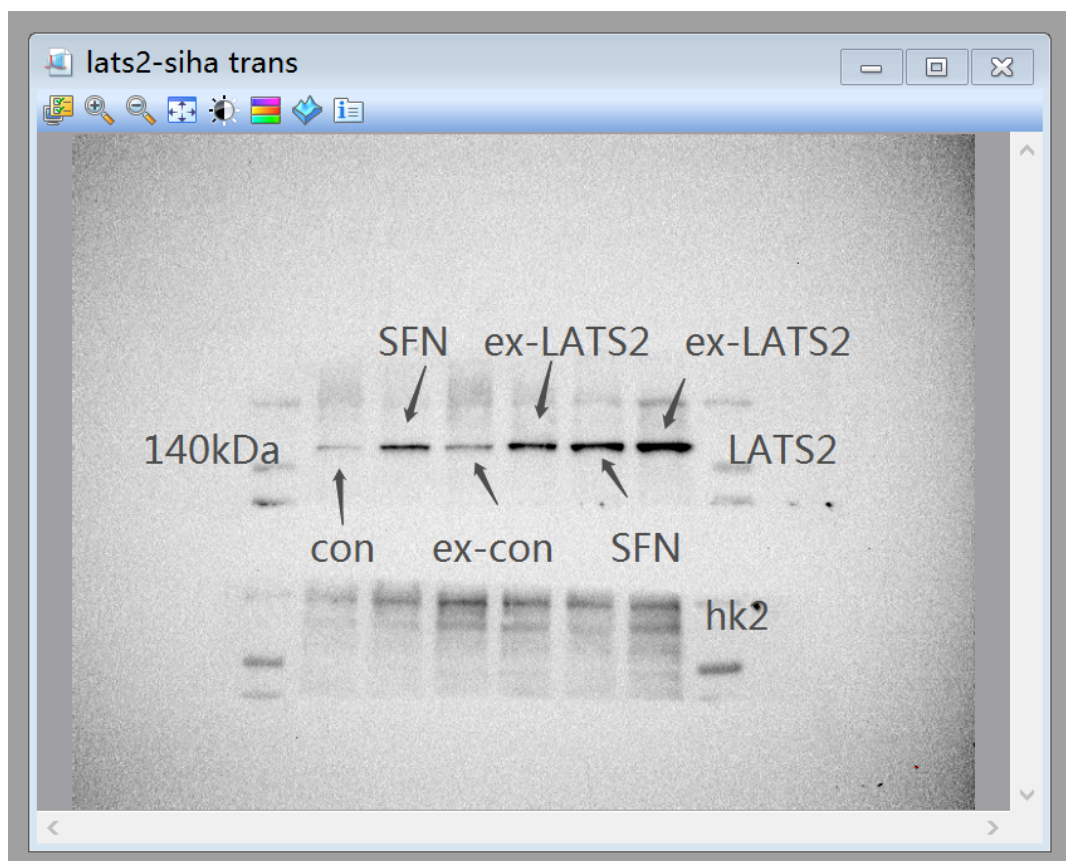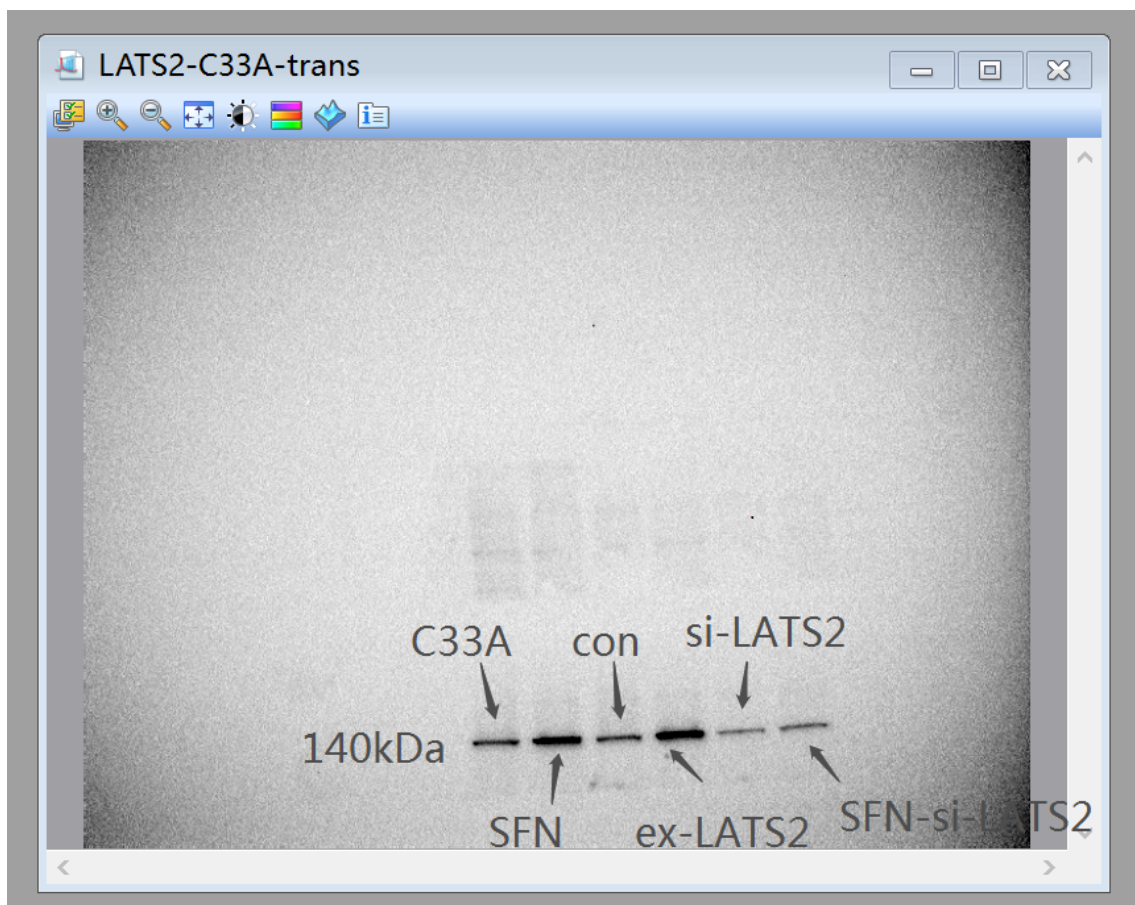

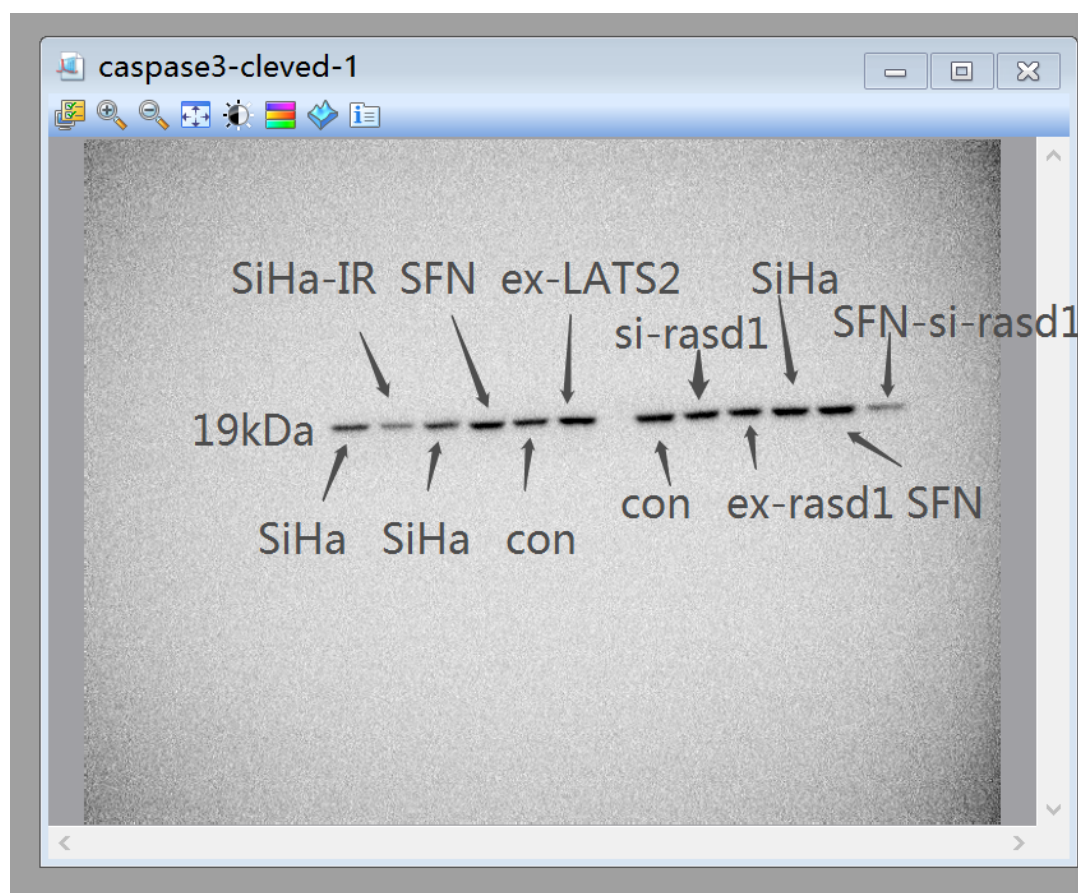



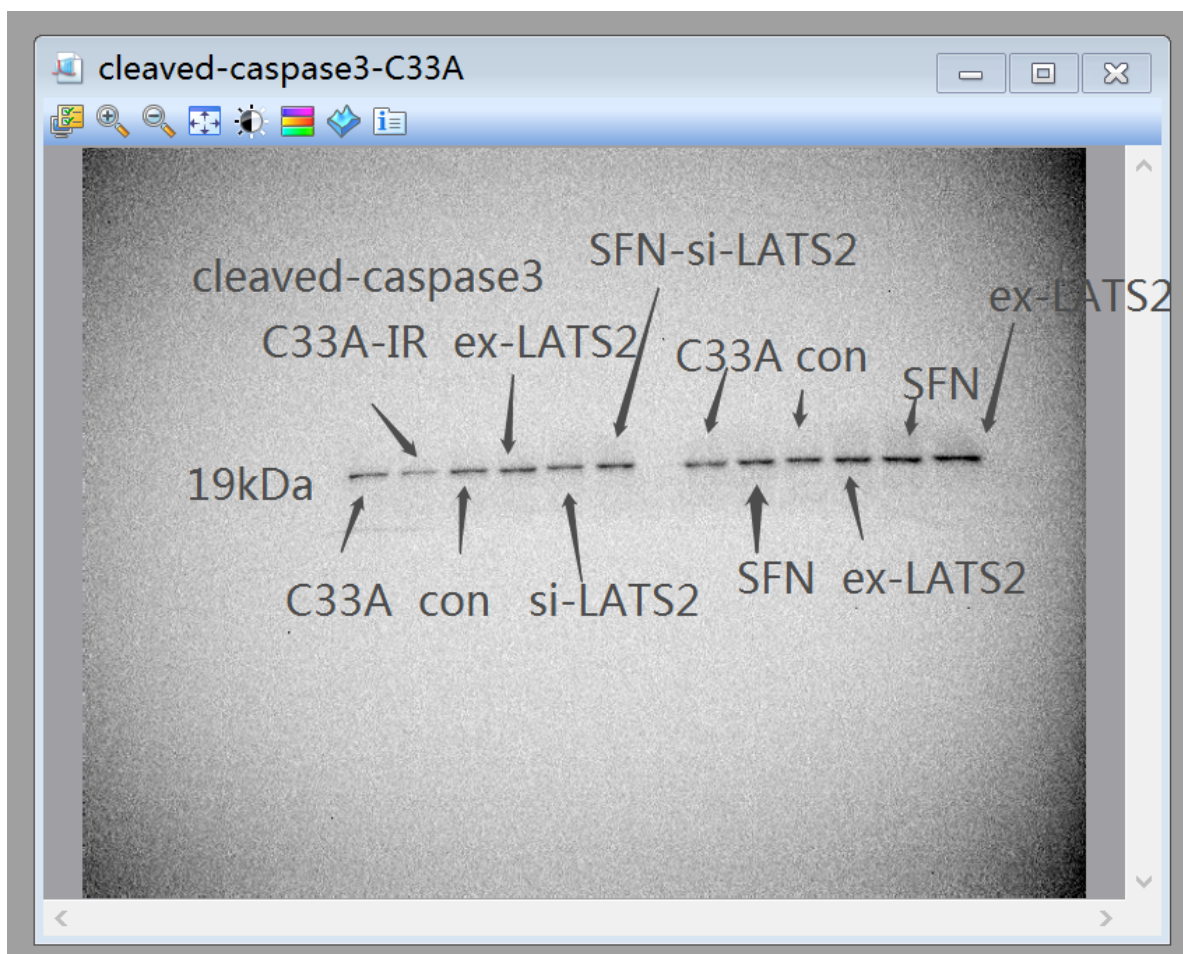

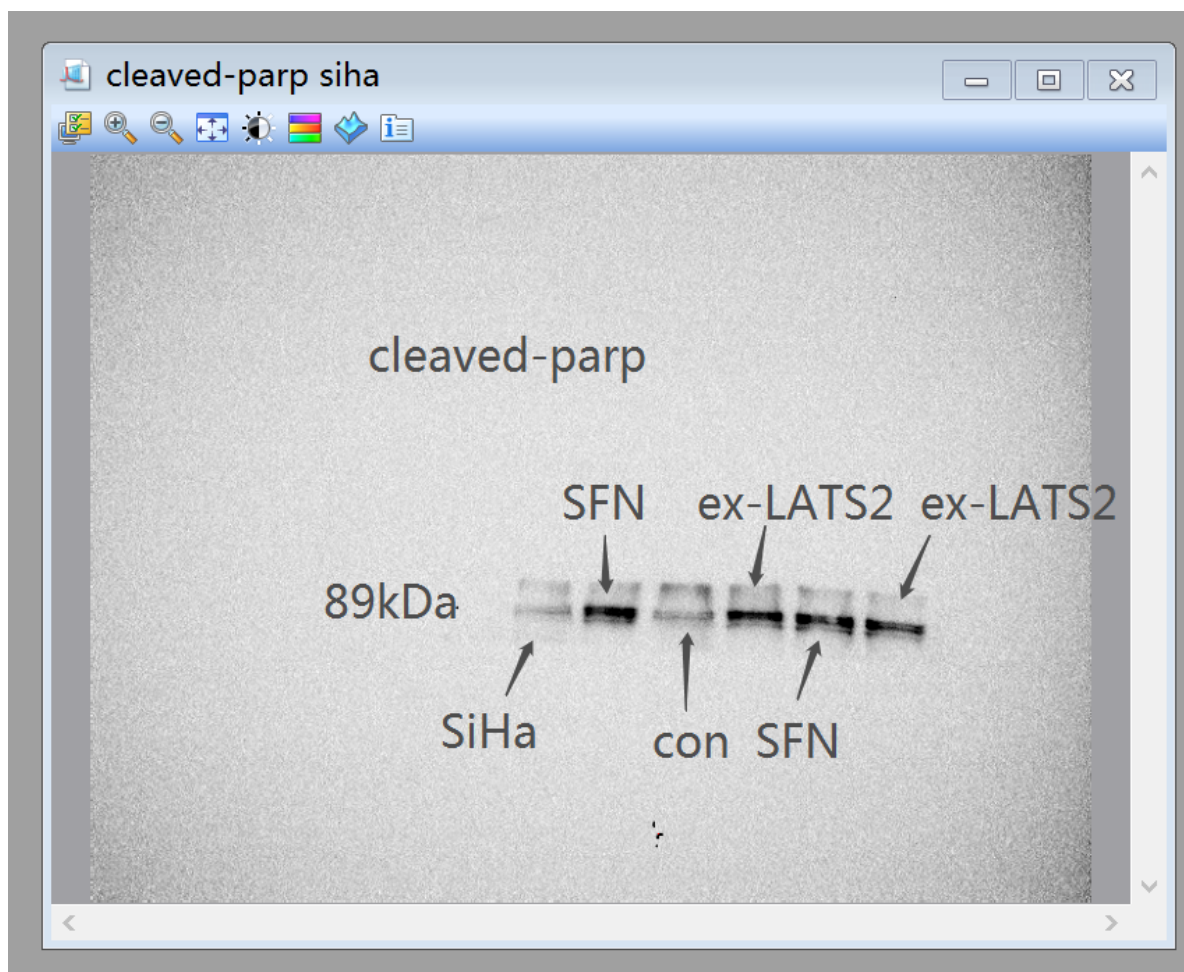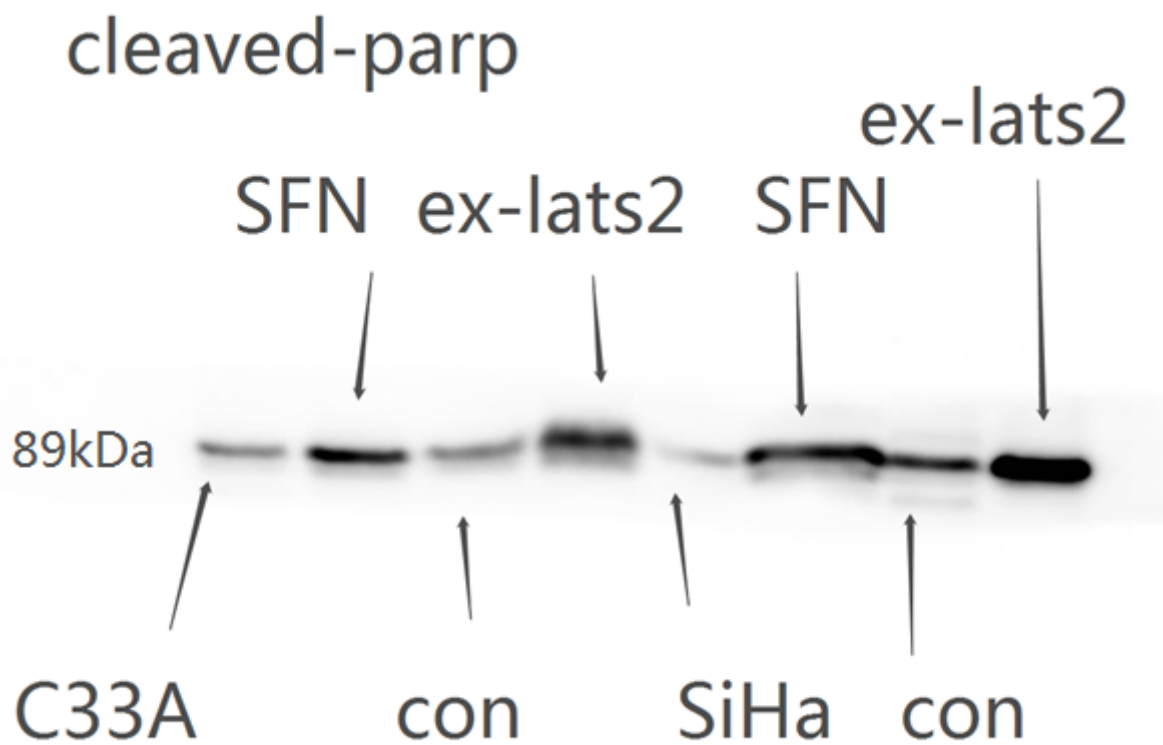



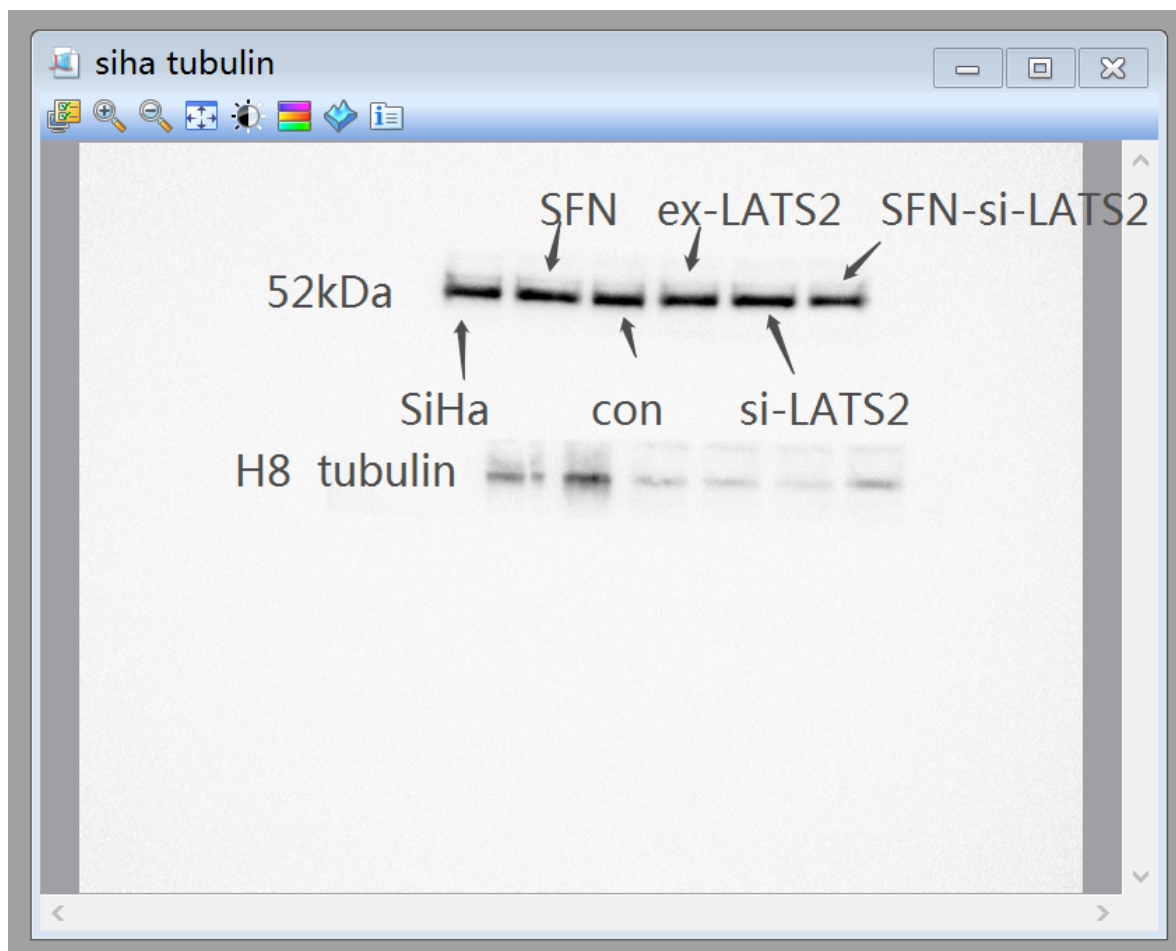

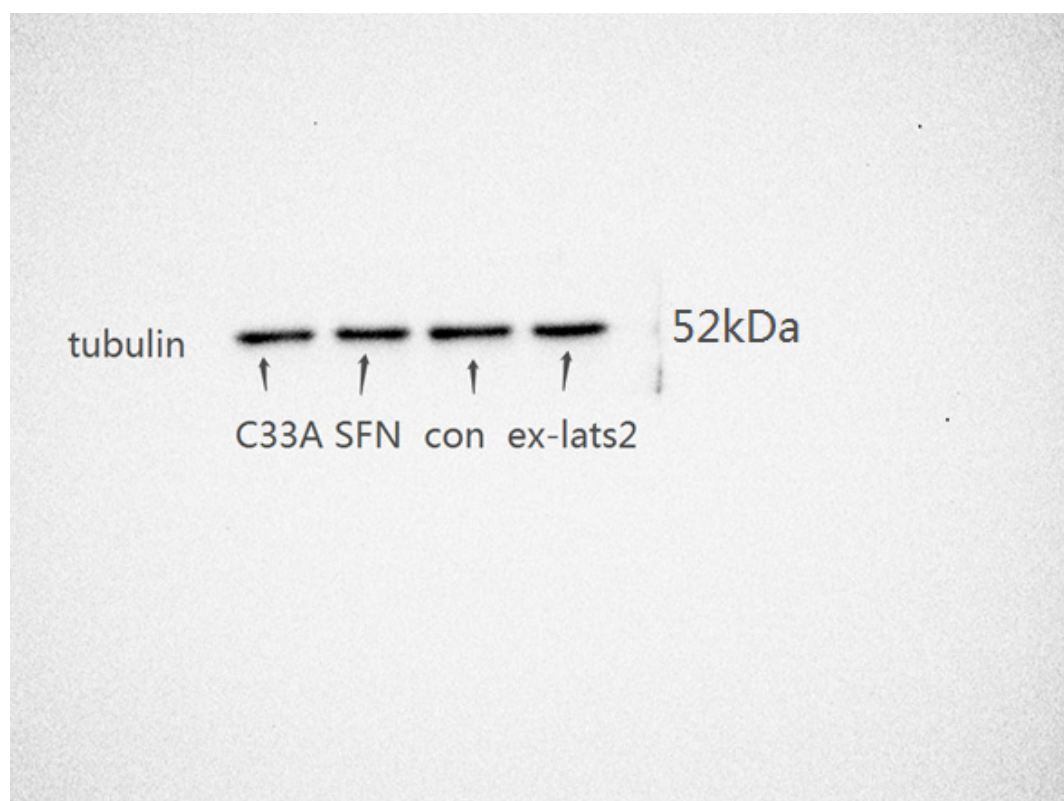

**Figure S2.** The original western blots for figure 2C.

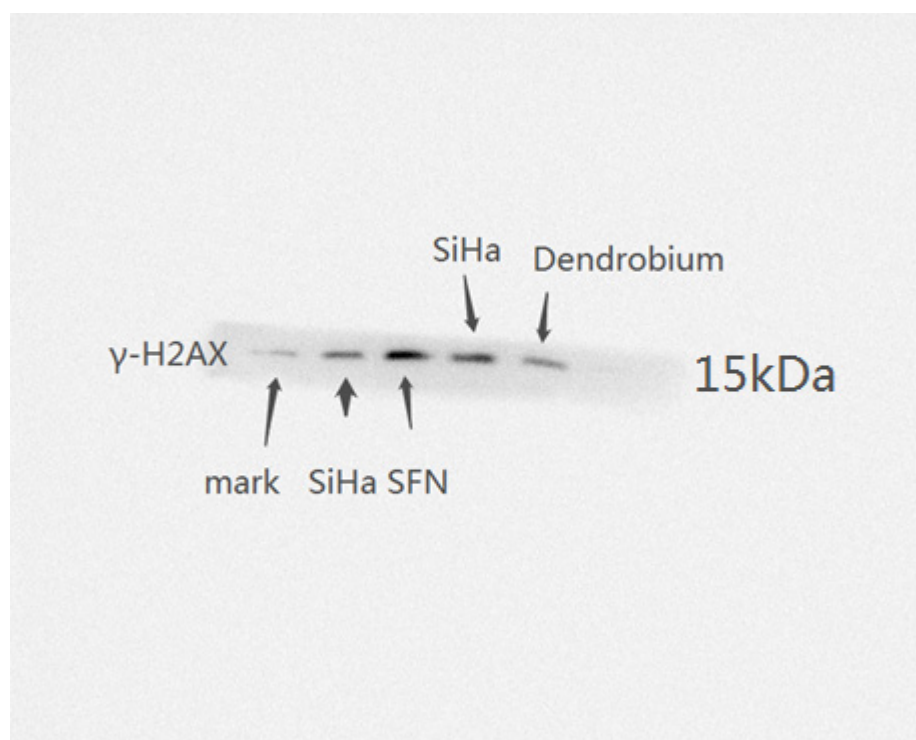

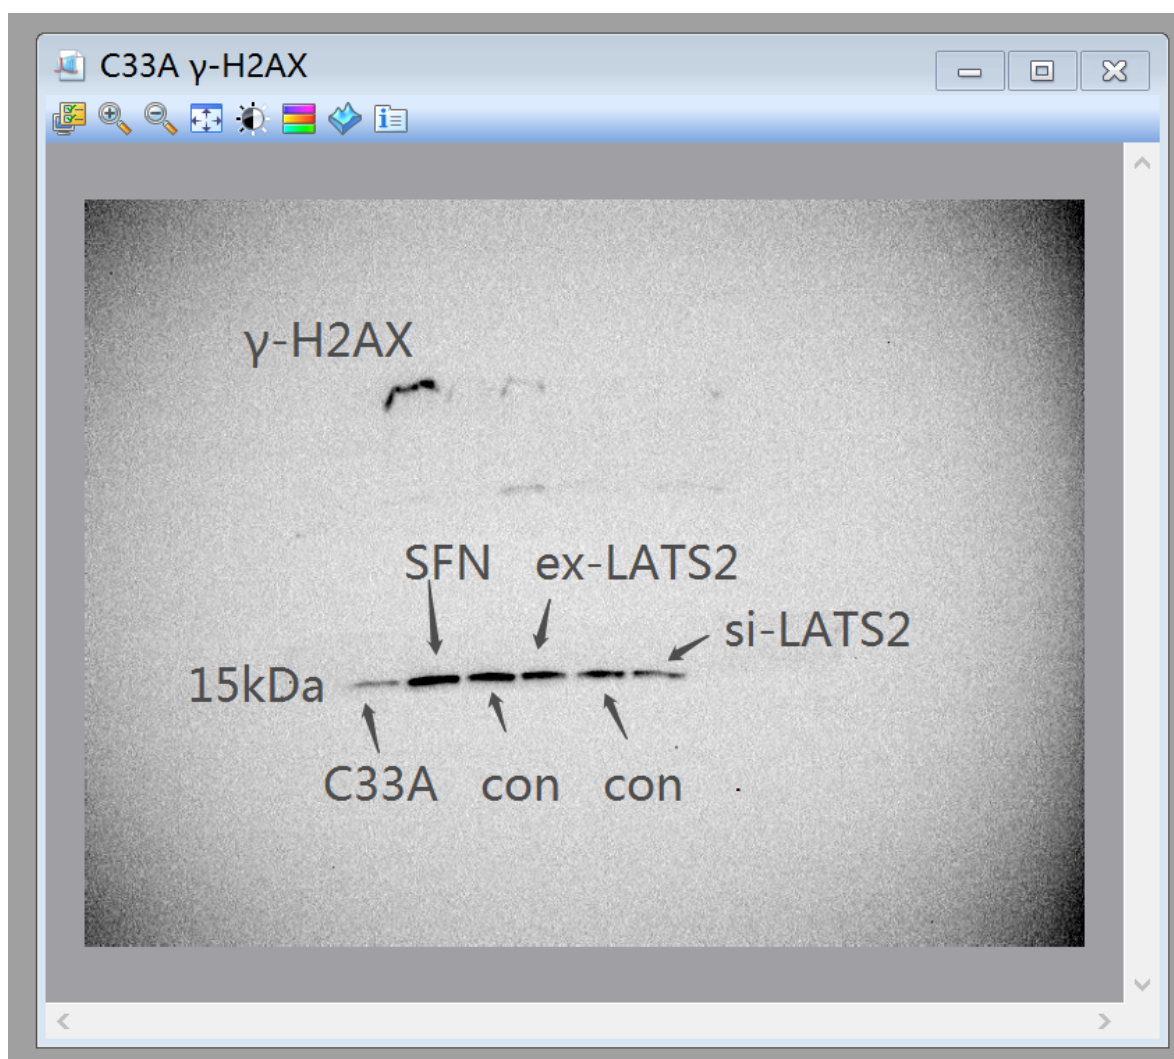



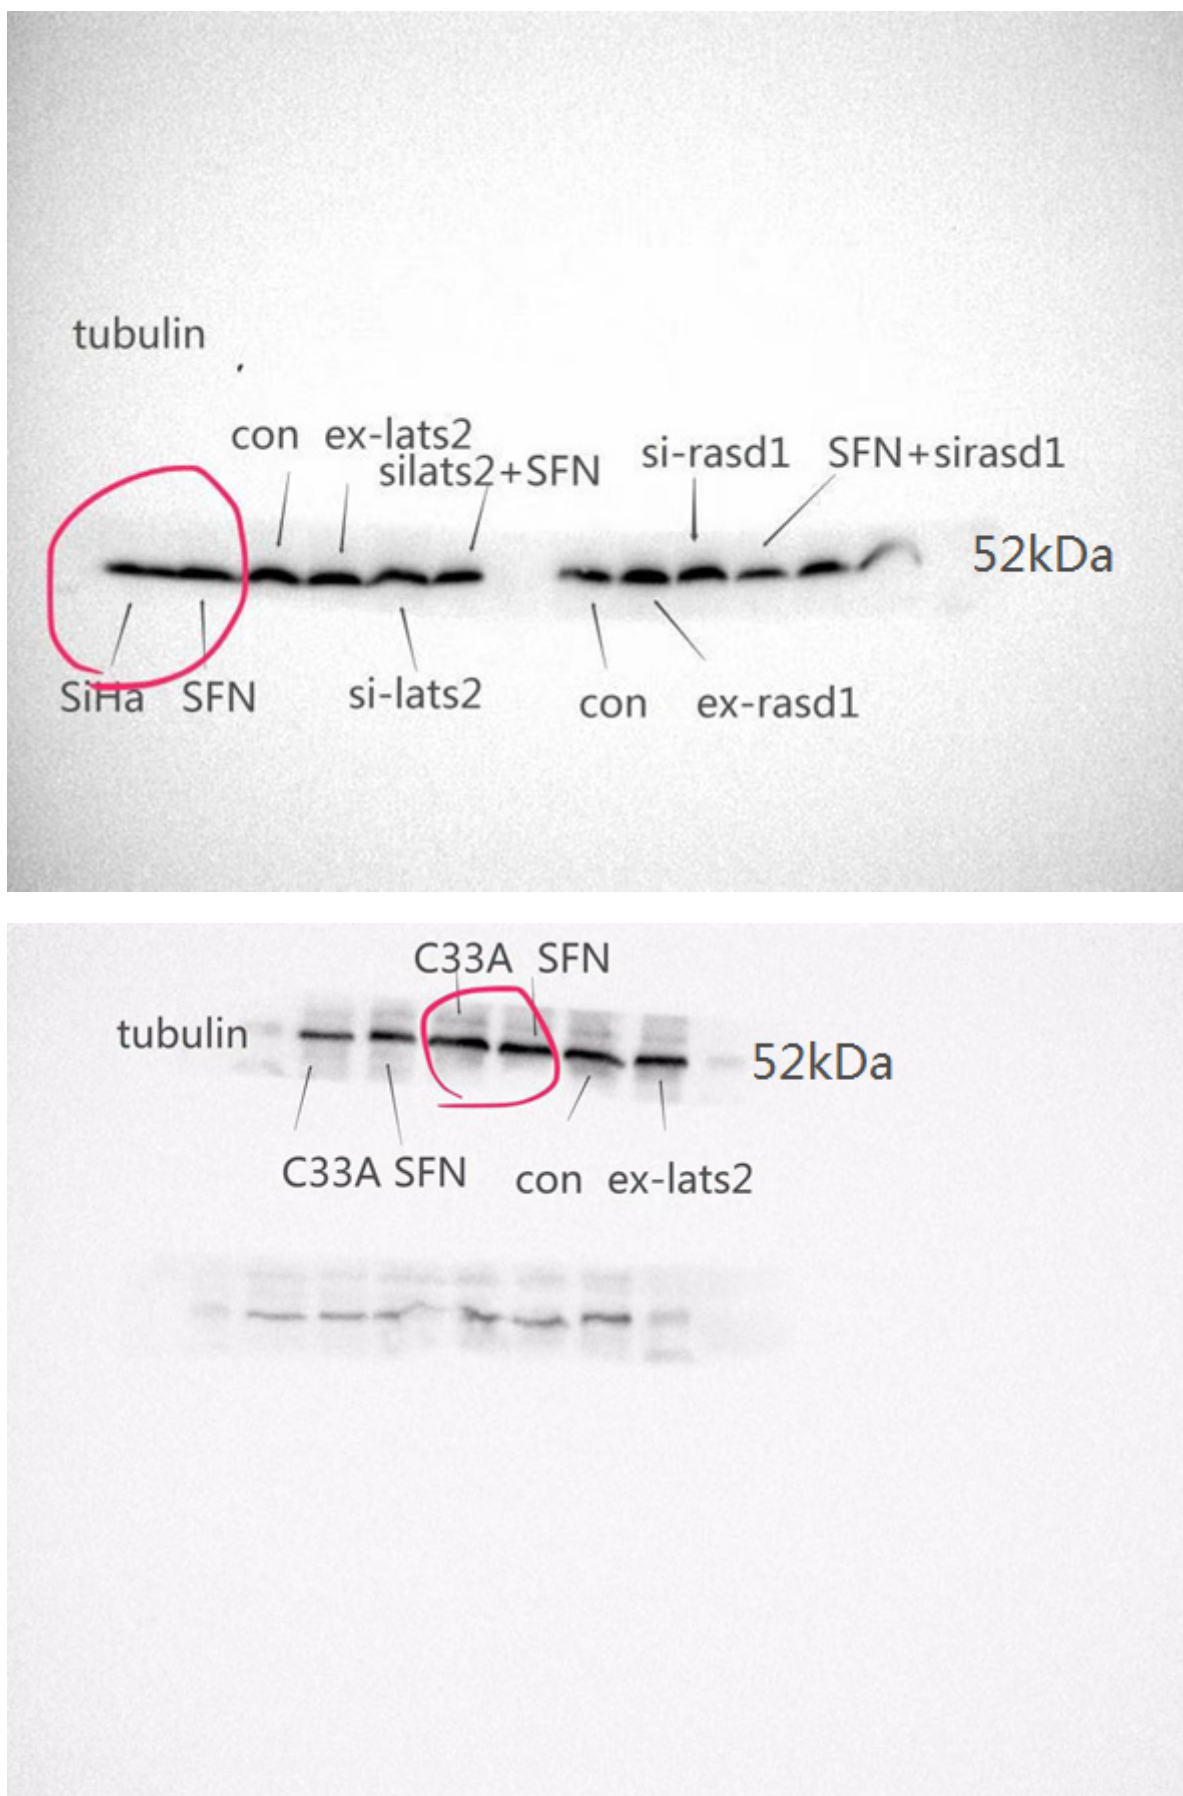

**Figure S3.** The original western blots for figure 3D.

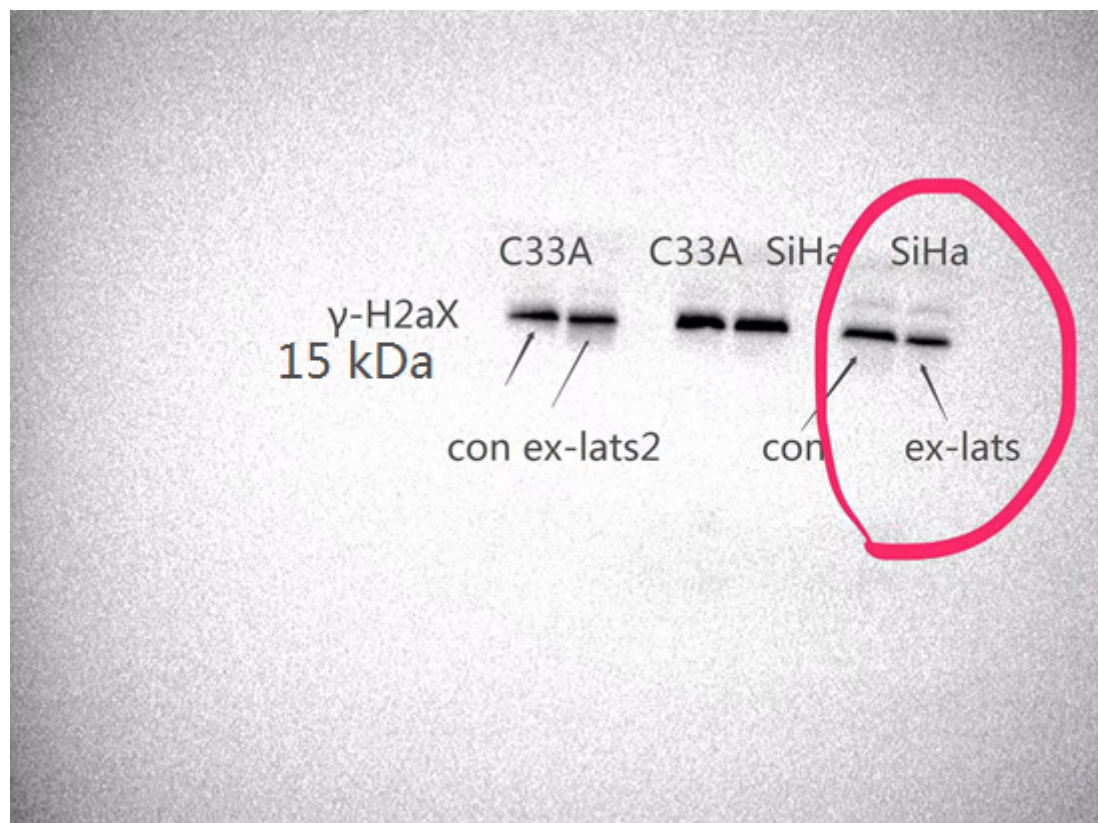

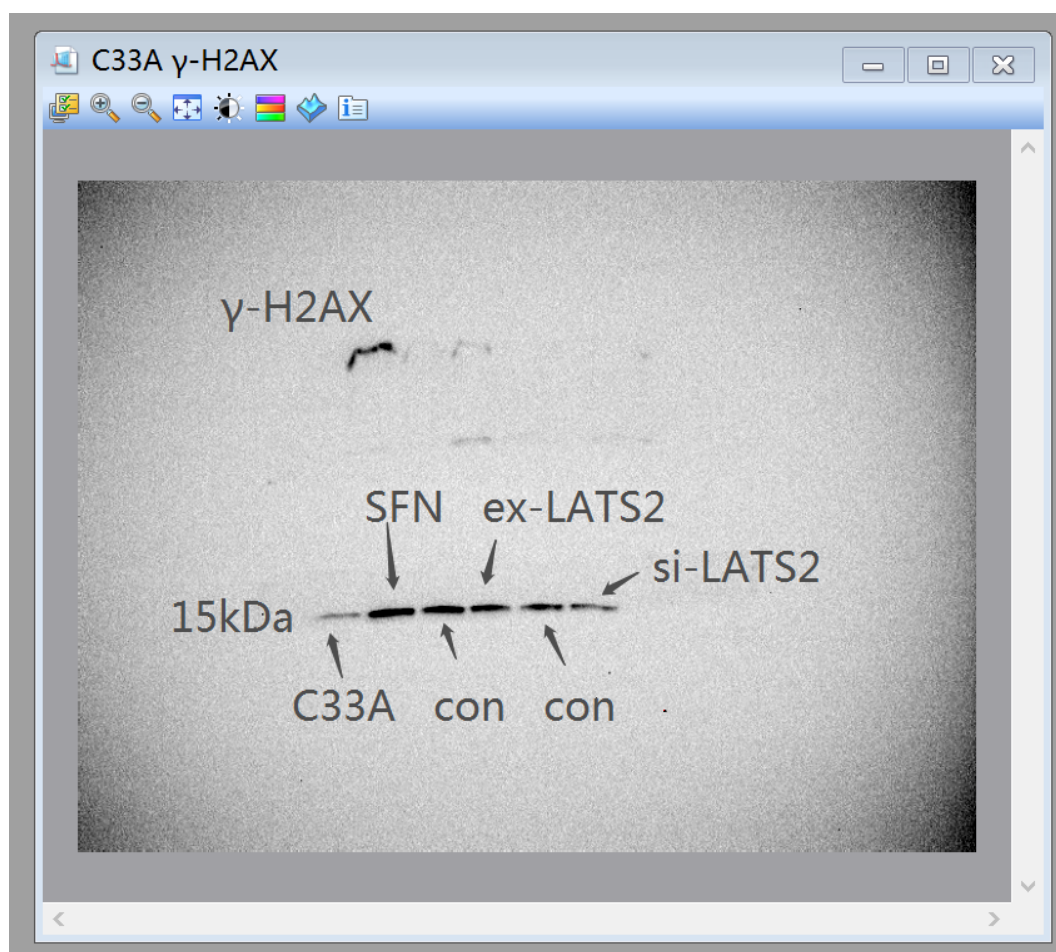



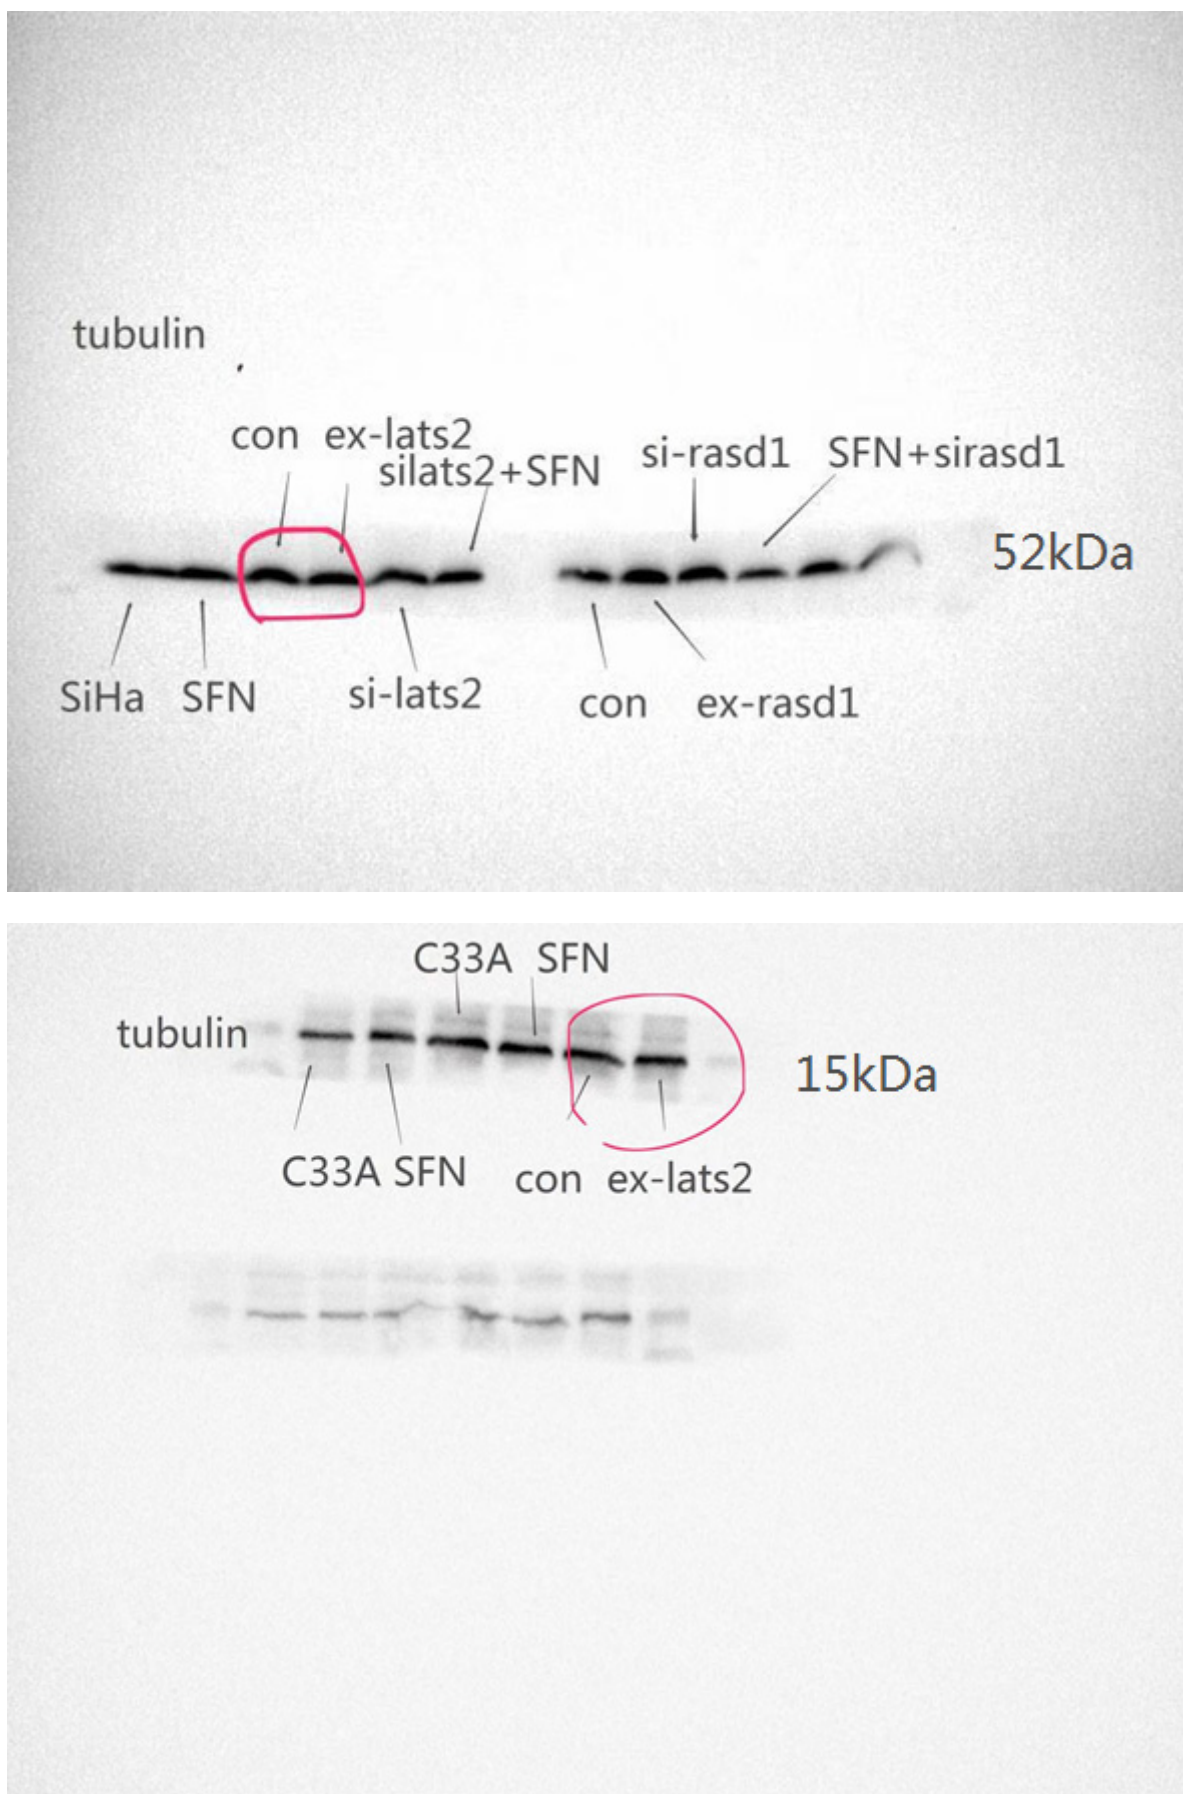

**Figure S4.** The original western blots for figure 4B.
