# Supplementary material for: SFN Enhanced the Radiosensitivity of Cervical Cancer Cells via Activating LATS2 and Blocking Rad51/MDC1 Recruitment to DNA Damage Site
Source: Cancers (Basel). 2022 Apr 8;14(8):1872. doi: 10.3390/cancers14081872 (PMC9026704; doi:10.3390/cancers14081872)
Supplement: Supplementary file 1 [file cancers-14-01872-s001.zip › Table S1.xlsx]

## Sheet: Supplementary File 1
Table S1: mRNA sequence difference between SFN treatment and the blank
seq_id	s_count	s_25_count	s_tpm	s_25_tpm	log2fc	pvalue	padjust	significant	regulate
ENSG00000204389	10834.5	250769	277.05	7704.91	4.63273	0	0	yes	up
ENSG00000260231	137	2072	3.7	67.21	4.01885	0	0	yes	up
ENSG00000129245	1905.47	5488.15	40.67	129.45	1.62625	0	0	yes	up
ENSG00000165280	9515	15830	155.4	297.48	0.834461	0	0	no	up
ENSG00000198408	4235	8933	62.18	146.61	1.17686	0	0	yes	up
ENSG00000141424	2114	5797	44.95	144.55	1.55541	0	0	yes	up
ENSG00000169375	3640	681	43.43	11.57	-2.31814	0	0	yes	down
ENSG00000069399	2202	135	102.27	5.24	-3.92771	0	0	yes	down
ENSG00000165029	2105	90	12.03	0.76	-4.44768	0	0	yes	down
ENSG00000178038	4296	991	80.05	25.34	-2.01596	0	0	yes	down
ENSG00000170852	910	3716.77	17.02	88.04	2.13019	0	0	yes	up
ENSG00000167526	50774.1	34808.9	7881.28	6542.87	-0.444562	0	0	no	down
ENSG00000160007	4096	906	28.22	7.62	-2.07656	0	0	yes	down
ENSG00000072110	15169	22516.4	273.84	479.91	0.669921	0	0	no	up
ENSG00000173559	4038.21	880.79	40.19	13.32	-2.09677	0	0	yes	down
ENSG00000275216	1302.54	4399.7	65.69	290.13	1.85615	0	0	yes	up
ENSG00000162783	1957	5462	28.22	94.72	1.58086	0	0	yes	up
ENSG00000113194	2801	6815	39.45	114.26	1.38285	0	0	yes	up
ENSG00000120948	5345.96	10313	214.15	588.11	1.04802	0	0	yes	up
ENSG00000248527	2712.27	291.72	412.29	51.95	-3.11677	0	0	yes	down
ENSG00000136636	3061	414	51.26	7.95	-2.78623	0	0	yes	down
ENSG00000024422	13585	6379	236.65	132.25	-0.990537	0	0	no	down
ENSG00000160886	7161.39	13078.9	564.91	1055.81	0.968999	0	0	no	up
ENSG00000152102	5207	10477	91.21	227.45	1.10878	0	0	yes	up
ENSG00000166888	5662	1582	117.23	39.97	-1.73949	0	0	yes	down
ENSG00000148730	3840	8558	30.89	82.91	1.25624	0	0	yes	up
ENSG00000272398	2633.95	235.15	79.31	9	-3.3855	0	0	yes	down
ENSG00000103978	1739.89	5344.88	51.42	164.76	1.71924	0	0	yes	up
ENSG00000152795	5578	1590	254.61	74.54	-1.71065	0	0	yes	down
ENSG00000197119	2903.36	331.23	87.92	11.92	-3.03174	0	0	yes	down
ENSG00000113742	289	2534	4.25	37.89	3.23235	0	0	yes	up
ENSG00000160888	2431.26	6422.38	73.92	232.67	1.50148	0	0	yes	up
ENSG00000165389	5063	1299	114.81	35.37	-1.86252	0	0	yes	down
ENSG00000101255	397	2782	10.89	86.81	2.90899	0	0	yes	up
ENSG00000117616	1185.87	4356.46	43.67	192.67	1.97729	0	0	yes	up
ENSG00000165678	6592	12204	202.96	450.49	0.988641	0	0	no	up
ENSG00000132003	453	2882	7.73	58.59	2.76956	0	0	yes	up
ENSG00000146242	1243	4487	24.98	108.33	1.952	0	0	yes	up
ENSG00000178927	3044.01	460.77	118.42	22.41	-2.62378	0	0	yes	down
ENSG00000088247	6593	11945	326.52	683.63	0.957475	0	0	no	up
ENSG00000197746	24434	32956	646.28	1033.74	0.531726	0	0	no	up
ENSG00000128731	5097.98	1488.08	55.35	22.21	-1.6764	0	0	yes	down
ENSG00000142192	47218	57519	899.15	1303.19	0.384777	0	0	no	up
ENSG00000172530	549	2861	31.96	135.08	2.48172	0	0	yes	up
ENSG00000255508	273.07	2244.51	6.05	44.52	3.13913	0	0	yes	up
ENSG00000102804	2346	233.96	46.39	5.11	-3.22579	0	0	yes	down
ENSG00000116044	7087.69	12394.7	162.79	329.67	0.906416	0	0	no	up
ENSG00000147274	6014.19	1996.48	187.16	74.55	-1.49084	0	0	yes	down
ENSG00000072736	3827.21	844.76	54.22	13.51	-2.0796	0	0	yes	down
ENSG00000132640	2897.89	445	38.54	6.77	-2.60305	0	0	yes	down
ENSG00000069956	2213	5718	30.6	109.35	1.46958	0	0	yes	up
ENSG00000121579	5304	10066	182.29	443.19	1.02441	0	0	yes	up
ENSG00000105401	5950	10913	274.36	580.07	0.975161	0	0	no	up
ENSG00000144579	2143.04	168.05	71.75	7.91	-3.57262	0	0	yes	down
ENSG00000204103	122	1844	2.21	40.2	4.01796	0	0	yes	up
ENSG00000163513	2183	183	28.35	2.86	-3.47632	0	0	yes	down
ENSG00000112096	14517.1	7485.99	378.27	276.78	-0.855409	0	0	no	down
ENSG00000196305	6379	11482	92.11	193.43	0.948047	0	0	no	up
ENSG00000104980	1488	4594.49	57.86	252.41	1.72661	0	0	yes	up
ENSG00000141401	5419	1649.02	265.17	93.89	-1.61634	0	0	yes	down
ENSG00000196700	3115.33	523.5	28.82	6.13	-2.47305	0	0	yes	down
ENSG00000118058	4497.36	1136.34	29.53	7.48	-1.88461	0	0	yes	down
ENSG00000132471	2751	6628	98.69	276.15	1.36869	0	0	yes	up
ENSG00000107984	1884	59	82.78	3.63	-4.89687	0	0	yes	down
ENSG00000137203	2245.14	180.17	60.62	6.88	-3.5393	0	0	yes	down
ENSG00000204673	2888.31	6819.96	102.18	239.7	1.33961	0	0	yes	up
ENSG00000125733	3016	469	111.05	21.68	-2.5849	0	0	yes	down
ENSG00000069011	3615	727	132.45	30.32	-2.21389	0	0	yes	down
ENSG00000113360	4505	1152	81.08	31.26	-1.86731	0	0	yes	down
ENSG00000107262	5776	1828.02	471.03	164.78	-1.55971	0	0	yes	down
ENSG00000136628	4360	8881	57.1	132.2	1.12647	0	0	yes	up
ENSG00000162736	3462	7626	87.96	220.57	1.2394	0	0	yes	up
ENSG00000115541	2591.45	6348.13	367.01	1135.96	1.39265	0	0	yes	up
ENSG00000021826	6509.61	2251.87	71.53	27.81	-1.43137	0	0	yes	down
ENSG00000073111	12533	6059	222.88	127.45	-0.948505	0	0	no	down
ENSG00000108551	13	1767	0.51	82.49	7.18672	0	0	yes	up
ENSG00000100941	5193	9975	92.15	210.71	1.04182	0	0	yes	up
ENSG00000109929	4877	1361	162.16	50.18	-1.74125	0	0	yes	down
ENSG00000065978	19585.9	28169	913.51	1577.83	0.624371	0	0	no	up
ENSG00000106245	1418.29	4433.38	111.01	425.65	1.74433	0	0	yes	up
ENSG00000179051	4915	10116.6	78.99	182.93	1.14153	0	0	yes	up
ENSG00000148339	1202.67	4466.24	23.58	98.43	1.9929	0	0	yes	up
ENSG00000143013	3869	595	120.93	20.63	-2.60092	0	0	yes	down
ENSG00000110619	1569	5383.11	42.01	173.84	1.87867	0	0	yes	up
ENSG00000117592	7491	13985	304.58	678.23	1.00073	0	0	yes	up
ENSG00000072210	6862	2030	159.64	53.63	-1.65707	0	0	yes	down
ENSG00000133401	3419	425	36.39	6.47	-2.90796	0	0	yes	down
ENSG00000118515	4995	1098	158.96	38.76	-2.08553	0	0	yes	down
ENSG00000111912	4528	886	91.27	16.86	-2.25342	0	0	yes	down
ENSG00000006652	1085.19	4514.48	29.63	100.64	2.15669	0	0	yes	up
ENSG00000123562	7771	14317	533.95	1167.64	0.981629	0	0	no	up
ENSG00000115484	3586.91	8553	95.44	272.98	1.35376	0	0	yes	up
ENSG00000160685	2655	162	49.25	6.83	-3.93457	0	0	yes	down
ENSG00000058668	10157	3946	84.99	41.36	-1.26394	0	0	yes	down
ENSG00000108557	2985.86	277	28.54	5.02	-3.33011	0	0	yes	down
ENSG00000117450	12878.3	20706.2	1030.21	1983.53	0.785199	0	0	no	up
ENSG00000135069	1806	5740	54.34	206.16	1.76833	0	0	yes	up
ENSG00000149115	5607	1412	117.64	30.7	-1.88941	0	0	yes	down
ENSG00000069275	11291	4632	102.44	50.55	-1.18539	0	0	yes	down
ENSG00000100823	4736	997	236.82	59.25	-2.14793	0	0	yes	down
ENSG00000111642	9065.6	3248.06	124.9	56.81	-1.38075	0	0	yes	down
ENSG00000175505	989	4345	36.29	192.41	2.23539	0	0	yes	up
ENSG00000154734	1504	5397	18.32	91.93	1.94343	0	0	yes	up
ENSG00000228265	179.12	2610.74	6.65	40.55	3.96554	0	0	yes	up
ENSG00000089280	13962	22336.9	464.36	960.45	0.778001	0	0	no	up
ENSG00000017260	3700.75	8888.96	64.85	186	1.36427	0	0	yes	up
ENSG00000103067	2746	159	63.42	5.65	-4.01016	0	0	yes	down
ENSG00000275052	1403	5172	20.03	89.8	1.98228	0	0	yes	up
ENSG00000162734	6337.99	12564.9	247.62	534.28	1.08738	0	0	yes	up
ENSG00000102580	1460	5216	15.45	67.05	1.93705	0	0	yes	up
ENSG00000140829	3387.4	8379.78	73.99	228.36	1.40681	0	0	yes	up
ENSG00000163468	7525	14146	236.26	556.02	1.01071	0	0	yes	up
ENSG00000122299	2832	7517	57.72	181.29	1.50841	0	0	yes	up
ENSG00000255112	2694	7295	54.92	178.65	1.53723	0	0	yes	up
ENSG00000100380	9744	16964	241.11	489.95	0.899965	0	0	no	up
ENSG00000105835	2045.77	6232.51	44.51	241.97	1.70724	0	0	yes	up
ENSG00000114270	11128	4481	139.3	69.8	-1.21223	0	0	yes	down
ENSG00000137494	520.99	3374.77	11.99	97.21	2.79554	0	0	yes	up
ENSG00000196313	2683.57	7298.31	28.09	104.55	1.54348	0	0	yes	up
ENSG00000143569	6414	12452	188.08	439.61	1.05716	0	0	yes	up
ENSG00000103064	9806.93	3771.51	158.21	84.17	-1.27858	0	0	yes	down
ENSG00000133056	2285.57	32.38	33.53	0.47	-6.04123	0	0	yes	down
ENSG00000115310	6427	12246	183.82	406.95	1.03017	0	0	yes	up
ENSG00000198959	14051	6610.98	191.32	103.47	-0.987662	0	0	no	down
ENSG00000163931	24932	14260	625.73	460.46	-0.705949	0	0	no	down
ENSG00000124201	4067	9000.15	32.86	91.58	1.24606	0	0	yes	up
ENSG00000131669	3057	359	176.62	24.61	-2.98999	0	0	yes	down
ENSG00000156273	627	3382	7.45	49.3	2.53141	0	0	yes	up
ENSG00000263001	7645.71	2624.26	141.35	50.99	-1.44266	0	0	yes	down
ENSG00000257529	3588	8329.28	101.64	281.71	1.31509	0	0	yes	up
ENSG00000124422	8549.08	14945	109.58	216.77	0.905897	0	0	no	up
ENSG00000110042	2136	48	24.52	0.61	-5.37566	0	0	yes	down
ENSG00000153187	19354.6	10309.1	338.01	211.59	-0.808673	0	0	no	down
ENSG00000135486	19139	10158.9	796.38	508.63	-0.8137	0	0	no	down
ENSG00000125657	1679	5302	69.4	262.23	1.75901	0	0	yes	up
ENSG00000128487	5132.36	1288.03	94.91	37.71	-1.89438	0	0	yes	down
ENSG00000124177	3409	507	20.48	4.75	-2.64922	0	0	yes	down
ENSG00000105856	1344.06	4722.2	34.24	134.78	1.91294	0	0	yes	up
ENSG00000111897	3030	7444	59.95	176.96	1.39684	0	0	yes	up
ENSG00000198840	2499	159	2405.8	165.91	-3.87418	0	0	yes	down
ENSG00000126524	2664.79	6954.98	113.48	353.06	1.4841	0	0	yes	up
ENSG00000080371	1543.15	5144.67	35.9	153.37	1.83728	0	0	yes	up
ENSG00000162073	2931.19	270.81	71.61	8.05	-3.33606	0	0	yes	down
ENSG00000196365	4517	9807	97.52	273.98	1.21852	0	0	yes	up
ENSG00000111142	3484	8315	91.61	307.4	1.35505	0	0	yes	up
ENSG00000172831	4331.24	832.1	76.13	17	-2.27988	0	0	yes	down
ENSG00000164190	5341	10933	36.71	91.97	1.13358	0	0	yes	up
ENSG00000186432	2402	6643.81	15.96	52.2	1.56785	0	0	yes	up
ENSG00000141101	5300.39	1291.61	219.43	76.71	-1.93685	0	0	yes	down
ENSG00000060491	3056	324	100.29	10.24	-3.1375	0	0	yes	down
ENSG00000197381	4816	1065	60.83	17.97	-2.07691	0	0	yes	down
ENSG00000110422	2665	7030	21.06	66.95	1.49946	0	0	yes	up
ENSG00000143384	5381	10950	90.8	207.71	1.12506	0	0	yes	up
ENSG00000167460	18461.7	27176.6	477.89	831.86	0.657908	0	0	no	up
ENSG00000215301	22179	31447	338.08	613.13	0.603803	0	0	no	up
ENSG00000166949	4446	913	54.55	14.95	-2.18375	0	0	yes	down
ENSG00000006194	958.51	4108.61	34.78	160.96	2.19986	0	0	yes	up
ENSG00000037474	8166	14587	181.67	416.7	0.937057	0	0	no	up
ENSG00000067369	3536.88	525.15	34.43	6.42	-2.6516	0	0	yes	down
ENSG00000167522	17488.8	25748.7	190.86	868.52	0.65814	0	0	no	up
ENSG00000224853	3750.05	499.53	58.71	9.4	-2.80819	0	0	yes	down
ENSG00000166848	3503	7591	109.09	284.56	1.21577	0	0	yes	up
ENSG00000204569	2621	6311	47.25	104.54	1.36783	0	0	yes	up
ENSG00000162613	3318	783	80.5	26.68	-1.98315	0	0	yes	down
ENSG00000172053	4010	1133	287.4	83.02	-1.72338	0	0	yes	down
ENSG00000103657	3204	730	41.13	14.35	-2.03383	0	0	yes	down
ENSG00000124067	5931.64	2215.05	143.82	52.11	-1.32102	0	0	yes	down
ENSG00000166902	1645	98	107.99	7.76	-3.96909	0	0	yes	down
ENSG00000144224	5396	9633	85.64	184.61	0.93617	0	0	no	up
ENSG00000143179	2239	313	75.66	15.84	-2.73854	0	0	yes	down
ENSG00000103264	2986.68	626.56	62.82	12.2	-2.15294	0	0	yes	down
ENSG00000151694	630.17	2688.02	8.94	46.4	2.19281	0	0	yes	up
ENSG00000169499	1464.41	44.14	24.29	0.64	-4.95201	0	0	yes	down
ENSG00000197961	353	2118.03	5.85	36.11	2.68506	0	0	yes	up
ENSG00000144354	1721	130	43.71	4.05	-3.62659	0	0	yes	down
ENSG00000092820	15947	9039	323.07	220.35	-0.718975	0	0	no	down
ENSG00000153443	795	2982	41.17	176.03	2.00733	0	0	yes	up
ENSG00000185324	2616.34	477	118.81	28.61	-2.35541	0	0	yes	down
ENSG00000130311	2028	4978	168.61	328.27	1.39558	0	0	yes	up
ENSG00000131504	8860	13899	122.66	224.91	0.749678	0	0	no	up
ENSG00000111641	2449	407	85.23	18.79	-2.48902	0	0	yes	down
ENSG00000100461	1784.34	4656.72	74.68	148.86	1.484	0	0	yes	up
ENSG00000051382	1757	132	28.77	4	-3.63443	0	0	yes	down
ENSG00000205542	18786	10933	3292.8	2233.29	-0.680895	0	0	no	down
ENSG00000169813	5522	9932	193.91	411.19	0.946969	0	0	no	up
ENSG00000177200	2163	253	27.11	3.11	-2.99575	0	0	yes	down
ENSG00000122966	2792	512	30.02	5.35	-2.34701	0	0	yes	down
ENSG00000138386	1909	168	46.47	6.38	-3.40621	0	0	yes	down
ENSG00000177383	1600	67	67.59	3.39	-4.47769	0	0	yes	down
ENSG00000278996	16882.6	23431.4	5072.97	8331.93	0.572982	0	0	no	up
ENSG00000089157	34423	23115.5	2526.31	1997.6	-0.474435	0	0	no	down
ENSG00000101654	1315	3963	14.76	53.72	1.69161	0	0	yes	up
ENSG00000160633	3415.41	7056.47	82.46	231.7	1.14696	0	0	yes	up
ENSG00000174010	793	3038	7.43	34.29	2.0378	0	0	yes	up
ENSG00000149016	483.87	2440.8	13.79	88.92	2.43474	0	0	yes	up
ENSG00000147130	2166	275	27	3.58	-2.87745	0	0	yes	down
ENSG00000095397	642	2741	14.37	79.53	2.19413	0	0	yes	up
ENSG00000075142	4665	1477	360.09	131.52	-1.55913	0	0	yes	down
ENSG00000117399	4545	1413	188.98	70.72	-1.58544	0	0	yes	down
ENSG00000213024	3705.66	956.72	79.09	26.67	-1.85349	0	0	yes	down
ENSG00000151012	802.38	2989	4.8	23.53	1.99738	0	0	yes	up
ENSG00000160113	1714	131	45.8	4.2	-3.60965	0	0	yes	down
ENSG00000136240	4741	8716	105.02	233.22	0.97855	0	0	no	up
ENSG00000168874	1602.02	105.76	32.26	1.27	-3.82095	0	0	yes	down
ENSG00000228253	1561	94	20612.4	1279.74	-3.95359	0	0	yes	down
ENSG00000136830	21279	13118	353.86	253.31	-0.597807	0	0	no	down
ENSG00000188636	1780	168	19.19	2.18	-3.30527	0	0	yes	down
ENSG00000168906	9068.37	4295.9	212.26	113.38	-0.977808	0	0	no	down
ENSG00000171786	4	1551	0.1	46.23	8.69906	0	0	yes	up
ENSG00000107779	1943.09	228.2	25.8	8.1	-2.98991	0	0	yes	down
ENSG00000124228	4329.28	8117.32	108.47	220.98	1.00695	0	0	yes	up
ENSG00000185658	2368.13	397.35	24.4	5.05	-2.47519	0	0	yes	down
ENSG00000114857	3637.53	998	41.52	15.06	-1.76577	0	0	yes	down
ENSG00000100097	7169	3066	1627.71	810.15	-1.12534	0	0	yes	down
ENSG00000073578	13137.6	7125.97	366.77	241.1	-0.782468	0	0	no	down
ENSG00000116062	3270.75	815.87	40.09	11.11	-1.90314	0	0	yes	down
ENSG00000150991	43015	30344	1328.25	1118.67	-0.403353	0	0	no	down
ENSG00000276293	2497	459	37.57	9.87	-2.34355	0	0	yes	down
ENSG00000205250	7344	3195	278.99	145.85	-1.10067	0	0	yes	down
ENSG00000171848	7136	3044	251.53	96.74	-1.12907	0	0	yes	down
ENSG00000113645	2601	490	45.43	9.2	-2.30814	0	0	yes	down
ENSG00000264230	2969.47	657.46	79.3	28.04	-2.07516	0	0	yes	down
ENSG00000063244	6912	11411	244.13	439.26	0.823325	0	0	no	up
ENSG00000173227	3704.01	1001	69.19	24.35	-1.78757	0	0	yes	down
ENSG00000165997	634	2670	5.15	26.1	2.17436	0	0	yes	up
ENSG00000174564	2274	5326	71.75	197.4	1.3279	0	0	yes	up
ENSG00000177106	5769.59	2160.47	149.91	69.42	-1.31705	0	0	yes	down
ENSG00000101367	7035	11611	170.17	337.16	0.822945	0	0	no	up
ENSG00000182446	6130	10480	86.65	184.33	0.873755	0	0	no	up
ENSG00000125691	7227	3059	1186.71	575.98	-1.14026	0	0	yes	down
ENSG00000074800	52891	38237	2031.74	1762.02	-0.367978	0	0	no	down
ENSG00000163655	3632	972	61.25	24.13	-1.80166	0	0	yes	down
ENSG00000102100	1259	3751	50.03	133.27	1.67507	0	0	yes	up
ENSG00000128016	345	2068	13.23	95.01	2.68364	0	0	yes	up
ENSG00000135919	1149.02	3563.7	38.77	151.92	1.73305	0	0	yes	up
ENSG00000068323	3648	7233	70.09	163.66	1.08756	0	0	yes	up
ENSG00000107957	2332.75	370.27	9.68	1.79	-2.55531	0	0	yes	down
ENSG00000135334	511	2408	22.58	119.88	2.33652	0	0	yes	up
ENSG00000131323	1834	181	18.55	3.27	-3.24086	0	0	yes	down
ENSG00000132356	5985.38	2308.01	117.44	52.48	-1.27472	0	0	yes	down
ENSG00000156970	2204	267	49.44	5.44	-2.94514	0	0	yes	down
ENSG00000221963	2282.03	218.16	13	1.5	-3.28678	0	0	yes	down
ENSG00000205765	2113	5255	24.43	75.87	1.41447	0	0	yes	up
ENSG00000243725	724.73	2975.37	22.24	97.69	2.13763	0	0	yes	up
ENSG00000177084	4858	1417	65.54	26.18	-1.67745	0	0	yes	down
ENSG00000116871	5198	1600	131.56	47.51	-1.59981	0	0	yes	down
ENSG00000132824	5957.99	10797	103.4	198.81	0.957808	0	0	no	up
ENSG00000162063	2005	146.74	29.48	2.6	-3.67219	0	0	yes	down
ENSG00000167658	54222	64522	1068.31	1522.57	0.350988	0	0	no	up
ENSG00000154874	2960.88	510	17.74	3.5	-2.43738	0	0	yes	down
ENSG00000168137	3496	7465	59.32	147.84	1.19451	0	0	yes	up
ENSG00000118898	18583	10471	181.93	120.29	-0.727509	0	0	no	down
ENSG00000137962	2380	280	24.71	3.39	-2.98739	0	0	yes	down
ENSG00000119138	1716	56	19.72	0.77	-4.8374	0	0	yes	down
ENSG00000255302	4521	1265	127.27	42.72	-1.73743	0	0	yes	down
ENSG00000130985	22437	30152	409.24	678.13	0.526449	0	0	no	up
ENSG00000256525	168.26	1879.73	7.93	77.16	3.58184	0	0	yes	up
ENSG00000090061	1307.1	4133.39	34.67	148.85	1.76103	0	0	yes	up
ENSG00000143337	2671.38	6241.13	46.61	136.08	1.3243	0	0	yes	up
ENSG00000056586	2989	6701	35.98	84.37	1.26479	0	0	yes	up
ENSG00000173548	2406.57	290.06	20.03	3.36	-2.95248	0	0	yes	down
ENSG00000125817	3584.86	806.87	79.27	21.43	-2.05143	0	0	yes	down
ENSG00000116161	2263	5707	148.98	456.25	1.43457	0	0	yes	up
ENSG00000144746	3678	818	116.98	30.65	-2.06867	0	0	yes	down
ENSG00000138434	10171	4568	137.13	70.76	-1.05475	0	0	yes	down
ENSG00000172534	4517	8975	37.49	93.83	1.09062	0	0	yes	up
ENSG00000155096	2160.96	5604.88	36.52	124.77	1.47509	0	0	yes	up
ENSG00000131746	2322	238	49.87	4.41	-3.18626	0	0	yes	down
ENSG00000165417	2119	5521	29.73	103.61	1.48162	0	0	yes	up
ENSG00000117500	2234.37	5688.69	40.98	123.51	1.4483	0	0	yes	up
ENSG00000229117	17597.9	9722.54	5980.07	3763.81	-0.755925	0	0	no	down
ENSG00000126464	1938	118	23.09	1.43	-3.93763	0	0	yes	down
ENSG00000155363	4831	1391	139.52	47.66	-1.69612	0	0	yes	down
ENSG00000171992	2698	388	29.03	5.08	-2.69769	0	0	yes	down
ENSG00000137504	3085	548	54.87	14.15	-2.39295	0	0	yes	down
ENSG00000248109	3157.15	580	42.46	8.99	-2.34442	0	0	yes	down
ENSG00000197461	1801	72	57.13	2.52	-4.54458	0	0	yes	down
ENSG00000126012	8962	14617	132.02	226.51	0.80583	0	0	no	up
ENSG00000270757	253.6	2139.13	20.42	208.14	3.17647	0	0	yes	up
ENSG00000244879	1398.88	4345.9	23.73	98.58	1.73546	0	0	yes	up
ENSG00000177971	1742.11	49.36	103.69	3.52	-5.04127	0	0	yes	down
ENSG00000106144	3306	677.49	52.33	12.67	-2.18674	0	0	yes	down
ENSG00000124193	10347.4	4805	168.2	108.57	-1.00658	0	0	yes	down
ENSG00000215154	491.96	2613	4.5	21.88	2.50917	0	0	yes	up
ENSG00000162522	6232	2286	79.22	35.01	-1.34679	0	0	yes	down
ENSG00000157657	2093	212	17.03	2.74	-3.20336	0	0	yes	down
ENSG00000067955	4927	9230	128.56	287.68	1.0057	0	0	yes	up
ENSG00000174197	2736	464	15.64	3.68	-2.4598	0	0	yes	down
ENSG00000099875	4319	8419	99.05	211.55	1.06303	0	0	yes	up
ENSG00000156802	6827	11666.7	75.85	152.25	0.873152	0	0	no	up
ENSG00000204387	1003.19	3505.2	89.58	160.26	1.90498	0	0	yes	up
ENSG00000197077	3183	657	21.71	5.11	-2.17635	0	0	yes	down
ENSG00000113580	4188	1157	43.6	13.42	-1.7558	0	0	yes	down
ENSG00000143578	192.13	1854.31	11.3	86.67	3.3708	0	0	yes	up
ENSG00000113070	60	1506	1.62	48.95	4.74969	0	0	yes	up
ENSG00000147459	2674	443	25.08	4.88	-2.49355	0	0	yes	down
ENSG00000090905	2672	445	32.95	4.88	-2.48597	0	0	yes	down
ENSG00000233276	6601.64	2530.38	444.66	202.52	-1.2834	0	0	yes	down
ENSG00000155097	1193	3812	24.64	102.4	1.77603	0	0	yes	up
ENSG00000104738	23137	14148	548.3	340.65	-0.609528	0	0	no	down
ENSG00000141526	10277	4862.48	365.07	210.42	-0.979578	0	0	no	down
ENSG00000134815	952	3426	15.93	76.86	1.94757	0	0	yes	up
ENSG00000122958	1991	5127	48.52	167.28	1.4647	0	0	yes	up
ENSG00000170004	13179	6817	163.97	101.65	-0.850957	0	0	no	down
ENSG00000027697	2071	182	68.33	6.68	-3.40824	0	0	yes	down
ENSG00000130707	16776	9275	758.85	498.83	-0.754904	0	0	no	down
ENSG00000102901	4851	1458	201.52	74.21	-1.63422	0	0	yes	down
ENSG00000156030	2473	331	30.8	4.82	-2.80128	0	0	yes	down
ENSG00000188486	5776	10449	254.75	542.28	0.955297	0	0	no	up
ENSG00000187164	3806.07	923	28.77	13.36	-1.94382	0	0	yes	down
ENSG00000177706	2802	466	54.94	8.98	-2.48798	0	0	yes	down
ENSG00000002549	1683	4706	61.05	205.06	1.58354	0	0	yes	up
ENSG00000221869	4176	1112	125.12	39.95	-1.80889	0	0	yes	down
ENSG00000140939	3308	691	157.07	39.73	-2.15913	0	0	yes	down
ENSG00000196639	280	2123	4.32	33.87	3.02268	0	0	yes	up
ENSG00000047634	1252	3993	15.87	69.35	1.77331	0	0	yes	up
ENSG00000100285	8758	14160	141.75	275.63	0.793224	0	0	no	up
ENSG00000149177	2234	249	21.58	2.82	-3.06534	0	0	yes	down
ENSG00000122705	2180.61	5444.97	160.08	476.76	1.42027	0	0	yes	up
ENSG00000139725	2026.04	183.59	48.42	9.95	-3.36403	0	0	yes	down
ENSG00000126773	2161	231.9	33.44	3.19	-3.12005	0	0	yes	down
ENSG00000107372	4256	8290.95	100.25	220.91	1.06211	0	0	yes	up
ENSG00000088888	4232	691.03	20.76	4.08	-2.51444	0	0	yes	down
ENSG00000049618	2882.12	597	29.89	7.82	-2.17125	0	0	yes	down
ENSG00000106636	2883	7712	87.82	324.78	1.51961	0	0	yes	up
ENSG00000124762	3406	13368	106.61	504	2.07271	0	0	yes	up
ENSG00000166598	17234	34264	446.18	1003.78	1.09151	0	0	yes	up
ENSG00000120438	6425.6	18312.9	184.49	689.81	1.61103	0	0	yes	up
ENSG00000197976	1601	9566	33.09	235.46	2.67902	0	0	yes	up
ENSG00000013588	10914.9	1768	158.69	22.66	-2.52604	0	0	yes	down
ENSG00000172292	1518.44	9201.48	12.54	91.49	2.69935	0	0	yes	up
ENSG00000113013	12932	27591	256.09	655.52	1.19333	0	0	yes	up
ENSG00000075785	5259	16705	153.22	596.5	1.76749	0	0	yes	up
ENSG00000050344	224.88	5945.73	1.5	29.23	4.8247	0	0	yes	up
ENSG00000142871	13262	2969	384.43	101.55	-2.05917	0	0	yes	down
ENSG00000170027	9607	22697	156.17	443.61	1.34042	0	0	yes	up
ENSG00000120742	2534.03	11125.2	110.68	572.81	2.2344	0	0	yes	up
ENSG00000134684	2892	11800	76.22	409.01	2.12872	0	0	yes	up
ENSG00000176788	19166	6083	684.42	260.25	-1.55562	0	0	yes	down
ENSG00000184009	92221.1	121319	6225.01	8592.97	0.495711	0	0	no	up
ENSG00000142798	21602.2	7470.05	124.45	57	-1.43192	0	0	yes	down
ENSG00000070495	575	6858.85	22.34	349.73	3.67641	0	0	yes	up
ENSG00000087086	73357	100092	7260.82	11722.5	0.548395	0	0	no	up
ENSG00000117318	14002	2973	845.49	212.43	-2.13557	0	0	yes	down
ENSG00000136802	3079	12987	42.84	217.94	2.17661	0	0	yes	up
ENSG00000140961	1175	9877	43.19	427.93	3.17149	0	0	yes	up
ENSG00000170345	234	7428	9.71	293.84	5.08847	0	0	yes	up
ENSG00000023909	1861	11429	29.58	228.51	2.71862	0	0	yes	up
ENSG00000150753	24010.8	45174.2	925.99	1821.54	1.01189	0	0	yes	up
ENSG00000171867	3124	13926	79.62	432.75	2.25639	0	0	yes	up
ENSG00000168374	6637	20142.9	276.9	1008.46	1.70174	0	0	yes	up
ENSG00000156304	1845	11256	28.91	200.04	2.70908	0	0	yes	up
ENSG00000134531	9486	23551	160.6	480.37	1.41199	0	0	yes	up
ENSG00000124145	8851	23575	215.03	687.54	1.51342	0	0	yes	up
ENSG00000198695	9452	797	2479.48	240.36	-3.46789	0	0	yes	down
ENSG00000100345	43565	69241	343.44	671.76	0.768532	0	0	no	up
ENSG00000139644	15835	33550	360.43	916.56	1.18327	0	0	yes	up
ENSG00000111799	72258	39582	582.19	384.59	-0.768238	0	0	no	down
ENSG00000173706	14781	3106	165.76	39.68	-2.15054	0	0	yes	down
ENSG00000076108	4756.6	16149.8	58.51	197.63	1.86358	0	0	yes	up
ENSG00000142528	545	7447	8.2	135.23	3.87241	0	0	yes	up
ENSG00000162772	125	7087	4.64	302.32	5.92525	0	0	yes	up
ENSG00000120885	2412	10712	248.69	1450.06	2.251	0	0	yes	up
ENSG00000198900	4332	14136	71.23	283.11	1.80634	0	0	yes	up
ENSG00000176014	12802.3	2894.73	483.13	131.63	-2.04482	0	0	yes	down
ENSG00000132823	2221	9506	67.01	273.69	2.1977	0	0	yes	up
ENSG00000280441	22747.2	38590.9	327.57	667.44	0.862645	0	0	no	up
ENSG00000152137	156	4797	4.74	174.77	5.04259	0	0	yes	up
ENSG00000168005	1158	7231	43.01	309.16	2.74264	0	0	yes	up
ENSG00000114019	7557	18052.9	106.11	309.2	1.35642	0	0	yes	up
ENSG00000178913	2072	9022	57.29	299.26	2.2225	0	0	yes	up
ENSG00000185883	5830	15374.9	378.85	1188.31	1.49908	0	0	yes	up
ENSG00000131051	6596	16871	226.93	587.28	1.45496	0	0	yes	up
ENSG00000174437	9614	20902	129.81	350.09	1.22051	0	0	yes	up
ENSG00000124216	550	5619	22.39	273.69	3.45289	0	0	yes	up
ENSG00000178381	172	4610	17.08	556.97	4.84436	0	0	yes	up
ENSG00000189060	8725	1571	240.05	51.85	-2.3734	0	0	yes	down
ENSG00000126777	7195	17284	120.02	361.55	1.36445	0	0	yes	up
ENSG00000141905	11674	2975	201.15	58.79	-1.87226	0	0	yes	down
ENSG00000130702	26124.1	11449	337.71	203.45	-1.09008	0	0	yes	down
ENSG00000251562	13926	4163	319.88	119.53	-1.64201	0	0	yes	down
ENSG00000183260	223.6	4762.38	5.65	40.22	4.51277	0	0	yes	up
ENSG00000059728	595	6033	6.41	84.36	3.44199	0	0	yes	up
ENSG00000108256	3831.38	12547	29.87	172.05	1.81148	0	0	yes	up
ENSG00000162923	4135	13067	46.85	171.12	1.76004	0	0	yes	up
ENSG00000120705	6765	17984	128.96	397.67	1.51063	0	0	yes	up
ENSG00000182095	3785	12986	38.96	157.61	1.87867	0	0	yes	up
ENSG00000141458	1431.08	8450.04	24.76	191.27	2.66193	0	0	yes	up
ENSG00000110172	1176	7867.85	55.66	419.29	2.84216	0	0	yes	up
ENSG00000196924	37250	57529	462.07	996.25	0.727124	0	0	no	up
ENSG00000104695	1049	7549	34.68	300.91	2.94735	0	0	yes	up
ENSG00000127954	14722.1	3981.16	160.03	48.67	-1.78665	0	0	yes	down
ENSG00000044574	17810	33248	276.79	621.35	1.00066	0	0	yes	up
ENSG00000212907	6586.25	470.36	11186.5	877.29	-3.70754	0	0	yes	down
ENSG00000163660	2732	10904	86.88	450.47	2.0969	0	0	yes	up
ENSG00000214517	3460	12216	98.75	521.67	1.92	0	0	yes	up
ENSG00000165494	1560.97	8474.97	26.61	137.58	2.54084	0	0	yes	up
ENSG00000065911	1955.87	9250.53	52.71	310.04	2.3418	0	0	yes	up
ENSG00000100221	2570.03	10434	65.25	265.94	2.12151	0	0	yes	up
ENSG00000183864	4089.9	13131.5	77.31	303.07	1.78297	0	0	yes	up
ENSG00000253352	5502	15433.3	108.4	345	1.58809	0	0	yes	up
ENSG00000141682	168	5036	5.84	208.9	5.00582	0	0	yes	up
ENSG00000125740	45	8027	0.85	176.8	7.57887	0	0	yes	up
ENSG00000167977	2940	10410	75.96	333.38	1.92416	0	0	yes	up
ENSG00000100591	2628	13351	151.15	909.95	2.44499	0	0	yes	up
ENSG00000170525	1491	11099	23.39	185.59	2.99615	0	0	yes	up
ENSG00000198431	23026	66157	411.64	1410.3	1.62271	0	0	yes	up
ENSG00000138061	22143.4	396.89	264.31	6.52	-5.70192	0	0	yes	down
ENSG00000178209	80859	28454	321.11	137.2	-1.4067	0	0	yes	down
ENSG00000175592	212	20866	10.63	1186.64	6.72102	0	0	yes	up
ENSG00000198763	31972.8	4085.7	2452.12	372.36	-2.86811	0	0	yes	down
ENSG00000127022	16368	51108	240.27	901.34	1.74275	0	0	yes	up
ENSG00000140941	5771.24	31482.1	157.13	1042.64	2.54766	0	0	yes	up
ENSG00000148248	10805	45101	227.29	1155.57	2.16154	0	0	yes	up
ENSG00000204256	7191	34286	159.91	867.21	2.35343	0	0	yes	up
ENSG00000140403	1857	21362	49.12	678.81	3.62408	0	0	yes	up
ENSG00000114251	20123	1092	448.4	30.83	-4.10373	0	0	yes	down
ENSG00000245532	26720	3454	454.06	20.14	-2.8515	0	0	yes	down
ENSG00000260032	8334.57	33059	92.65	442.27	2.08794	0	0	yes	up
ENSG00000106105	2603	20962	84.4	744.68	3.1096	0	0	yes	up
ENSG00000075624	97339.9	153875	3423.79	6525.83	0.760731	0	0	no	up
ENSG00000179335	2123.65	19100.6	99.74	421.21	3.26908	0	0	yes	up
ENSG00000197063	1483	20811	20.04	316.89	3.91083	0	0	yes	up
ENSG00000103257	177844	244913	2428.2	3994.84	0.56173	0	0	no	up
ENSG00000198888	36530	4271	3176.72	440.51	-2.99636	0	0	yes	down
ENSG00000198899	35091.3	2624.27	5334.15	467.3	-3.64105	0	0	yes	down
ENSG00000198804	158936	7802.81	7227.81	424.22	-4.24824	0	0	yes	down
ENSG00000204388	5405.29	118657	136.79	3604.01	4.55636	0	0	yes	up
ENSG00000080824	38524	158241	707.91	3482.19	2.13837	0	0	yes	up
ENSG00000198712	84243	3299	12702.1	582.83	-4.57438	0	0	yes	down
ENSG00000151929	2113	66281	52.3	1969.29	5.07131	0	0	yes	up
ENSG00000198886	83795.9	7494.38	4397.87	469.59	-3.38292	0	0	yes	down
ENSG00000120694	3104	60786	54.04	1280.72	4.39161	0	0	yes	up
ENSG00000198727	33903	2948	2289.03	236.94	-3.42353	0	0	yes	down
ENSG00000198938	61737.4	1980.01	7367.78	279.85	-4.86249	0	0	yes	down
ENSG00000096384	19460	89685	481.33	2699.24	2.30443	0	0	yes	up
ENSG00000109971	35853	117920	1293.98	5033.79	1.81772	0	0	yes	up
ENSG00000087074	1878	35699	51.58	1166.65	4.34869	0	0	yes	up
ENSG00000125968	34812	727	2792.58	69.33	-5.48141	0	0	yes	down
ENSG00000116285	800	32298	17	838.36	5.43538	0	0	yes	up
ENSG00000162231	2824.09	36789.7	69.37	1009.93	3.80352	0	0	yes	up
ENSG00000086061	8171	48302	222.98	1567.43	2.66357	0	0	yes	up
ENSG00000198786	69159.9	5385.26	3465.35	314.42	-3.58277	0	0	yes	down
ENSG00000168439	7020	29112	210.26	1045.22	2.15215	0	0	yes	up
ENSG00000125977	7462.75	29274.6	177.97	838.16	2.07195	0	0	yes	up
ENSG00000161011	19060.2	48069.1	533.63	1593.55	1.43462	0	0	yes	up
ENSG00000273237	121.21	9803.05	0.99	134.8	6.43773	0	0	yes	up
ENSG00000168802	3822.9	17841.6	149.62	626.11	2.32258	0	0	yes	up
ENSG00000159140	15938.7	37591.4	241.26	773.44	1.33795	0	0	yes	up
ENSG00000196230	30681.6	9436.92	727.34	268.54	-1.60091	0	0	yes	down
ENSG00000011304	14378	34921	342.57	922.1	1.38031	0	0	yes	up
ENSG00000101150	8937	26307	247.34	811.58	1.65766	0	0	yes	up
ENSG00000144381	16951.1	38187.1	476.82	1237.58	1.27178	0	0	yes	up
ENSG00000234127	1839	13861	38.01	307.43	3.01411	0	0	yes	up
ENSG00000185215	27756	8354	712.87	281.48	-1.63219	0	0	yes	down
ENSG00000111011	2332	13834	74.02	424.01	2.66865	0	0	yes	up
ENSG00000127481	11757.9	30251.7	128.95	418.98	1.46347	0	0	yes	up
ENSG00000109814	1598	11934	34.36	297.92	3.00081	0	0	yes	up
ENSG00000186174	9490	393.75	86.46	3.55	-4.49098	0	0	yes	down
ENSG00000169504	6149	20583	86.6	353.5	1.8431	0	0	yes	up
ENSG00000265972	10870	947	233.23	24.61	-3.42077	0	0	yes	down
ENSG00000204516	468.03	8627	15.21	283.1	4.30426	0	0	yes	up
ENSG00000170606	5593	20189	76.48	356.52	1.95195	0	0	yes	up
ENSG00000124942	37645	12888	176.87	77.22	-1.44635	0	0	yes	down
ENSG00000058262	9868.24	29346	167.66	611.83	1.67237	0	0	yes	up
ENSG00000181222	12542	33670	128.5	418.83	1.52477	0	0	yes	up
ENSG00000105887	6232.44	12532.9	148.62	343.67	1.10792	0	0	yes	up
ENSG00000100292	3001	19935	111.89	885.89	2.83186	0	0	yes	up
ENSG00000168003	42521	80419	1478.19	3402.37	1.01944	0	0	yes	up
ENSG00000105993	3515.56	20778	194.64	1167.13	2.66331	0	0	yes	up
ENSG00000116560	11093	34831	219.4	810.5	1.7508	0	0	yes	up
ENSG00000135480	114826	60057.6	4773.05	2861.84	-0.834954	0	0	no	down
ENSG00000100201	23595	4212	333.79	87.09	-2.38583	0	0	yes	down
ENSG00000130066	2749	18022	169.26	1272.13	2.81286	0	0	yes	up
ENSG00000175602	1163	14073	53.56	690.82	3.69708	0	0	yes	up
ENSG00000130766	470	12117	8.36	259.15	4.7883	0	0	yes	up
ENSG00000271303	2316	16807.1	54.26	472.77	2.95944	0	0	yes	up
ENSG00000035403	9241.03	30085.5	81.29	289.39	1.80302	0	0	yes	up
ENSG00000173530	438	11576	7.59	241.08	4.82414	0	0	yes	up
ENSG00000112972	2717.86	17072.5	57	404.95	2.75121	0	0	yes	up
ENSG00000173812	5886	23281	396.09	1756.06	2.08387	0	0	yes	up
ENSG00000113407	6419	24087	173.37	863.21	2.00791	0	0	yes	up
ENSG00000146731	6841	24453	171.52	739.54	1.93781	0	0	yes	up
ENSG00000110958	5858	19593	206.85	899.53	1.84193	0	0	yes	up
ENSG00000128595	12829	25038	267.71	580.39	1.06479	0	0	yes	up
ENSG00000101608	6416.81	18630.3	452.87	1592.62	1.6378	0	0	yes	up
ENSG00000197102	24320	10400	208.68	131.98	-1.12548	0	0	yes	down
ENSG00000131149	8214	2356	102.62	36.54	-1.70167	0	0	yes	down
ENSG00000090273	3642	9415	138.58	426.85	1.47031	0	0	yes	up
ENSG00000145604	6107.96	1319.99	136.5	37.6	-2.11009	0	0	yes	down
ENSG00000185624	17872.6	28061	500.94	1024.67	0.75089	0	0	no	up
ENSG00000164609	1421	5702.7	51.82	257.22	2.10481	0	0	yes	up
ENSG00000173110	4	3864.12	0.11	125.88	10.016	0	0	yes	up
ENSG00000196576	15435	6683	225.49	112.64	-1.10756	0	0	yes	down
ENSG00000135018	6799	14029	116.58	305.89	1.14509	0	0	yes	up
ENSG00000136068	27659.9	15059.7	225.05	153.26	-0.777029	0	0	no	down
ENSG00000197603	4792	790	43.51	15.73	-2.50063	0	0	yes	down
ENSG00000142168	8930	16625	761.66	1684.38	0.996697	0	0	no	up
ENSG00000084652	3836	9541	46.77	138.96	1.41461	0	0	yes	up
ENSG00000179119	1085	4938	12.27	69.19	2.28631	0	0	yes	up
ENSG00000148303	23488.8	12206.7	2266.63	1390.39	-0.844226	0	0	no	down
ENSG00000102554	5031	904	88.07	20.93	-2.37638	0	0	yes	down
ENSG00000137947	588	3880	32.67	255.7	2.82224	0	0	yes	up
ENSG00000130164	2050.09	6722.68	31.81	120.15	1.81342	0	0	yes	up
ENSG00000149480	3461	8943	80.72	249.41	1.46965	0	0	yes	up
ENSG00000178252	5792.93	1153.21	126.4	26.61	-2.22856	0	0	yes	down
ENSG00000173575	6175.85	13208.1	63.45	180	1.19679	0	0	yes	up
ENSG00000164292	12193.5	4328.55	166.71	67.79	-1.39408	0	0	yes	down
ENSG00000119669	3332.21	28	48.43	0.49	-6.79483	0	0	yes	down
ENSG00000176994	1186.57	5595.94	8.32	47.27	2.33766	0	0	yes	up
ENSG00000182944	10653	19644	287.18	612.26	0.982904	0	0	no	up
ENSG00000106366	420	3857	8.16	90.01	3.29909	0	0	yes	up
ENSG00000143153	6479.32	1353.6	195.69	49.75	-2.15897	0	0	yes	down
ENSG00000054967	1113	5367	13.35	85.94	2.36974	0	0	yes	up
ENSG00000156860	1259	5457	22.98	113.61	2.2159	0	0	yes	up
ENSG00000146834	2940	8548.96	58.8	199.07	1.64001	0	0	yes	up
ENSG00000125505	3926.94	10018.8	114.99	325.08	1.4513	0	0	yes	up
ENSG00000130706	4247.92	10498.9	212.63	650	1.40549	0	0	yes	up
ENSG00000154803	667.1	4304.23	14.32	125.35	2.78986	0	0	yes	up
ENSG00000101447	4333	10618	115.39	340.51	1.39315	0	0	yes	up
ENSG00000272391	2570.22	7822.97	31.4	118.44	1.7059	0	0	yes	up
ENSG00000006831	1756	6415	27.35	118.88	1.96923	0	0	yes	up
ENSG00000085662	88459.8	106327	4630.66	6488.66	0.365485	0	0	no	up
ENSG00000186594	1344	5764	44.69	304.99	2.20061	0	0	yes	up
ENSG00000196139	9259.83	3047.42	536.79	213.54	-1.50332	0	0	yes	down
ENSG00000161960	19693.6	29907	847.39	1450.73	0.70283	0	0	no	up
ENSG00000115524	10661.1	18817	212.71	510.71	0.91975	0	0	no	up
ENSG00000108946	4962	10935.5	132.18	296.03	1.24011	0	0	yes	up
ENSG00000070669	531	3594	20.44	233.68	2.85888	0	0	yes	up
ENSG00000277443	2777	126	39.16	2.14	-4.36196	0	0	yes	down
ENSG00000186260	2630	26	24.3	0.76	-6.56033	0	0	yes	down
ENSG00000113615	1232.37	5016.43	11.66	56.77	2.1253	0	0	yes	up
ENSG00000149639	5250	1107	23.2	5.91	-2.14559	0	0	yes	down
ENSG00000161547	10894.5	4180.64	539.3	237.58	-1.28173	0	0	yes	down
ENSG00000005486	3001	8047	116.03	378.34	1.52308	0	0	yes	up
ENSG00000168488	2774.08	7598.69	68.52	216.46	1.55382	0	0	yes	up
ENSG00000106351	3451	365	80.21	12.48	-3.14097	0	0	yes	down
ENSG00000276043	3313.3	316.55	53.64	6.41	-3.28769	0	0	yes	down
ENSG00000088367	4258	677	89.4	16.2	-2.55287	0	0	yes	down
ENSG00000172270	25656	36295	1114	1875.56	0.60055	0	0	no	up
ENSG00000114416	3530	8734	115.59	304.19	1.40705	0	0	yes	up
ENSG00000013441	766	4029	26.82	165.79	2.49508	0	0	yes	up
ENSG00000125730	48450.1	31336.7	878.77	647.26	-0.528574	0	0	no	down
ENSG00000247556	3253.04	294.44	51.01	10.07	-3.36567	0	0	yes	down
ENSG00000058673	4004.5	9579.89	52.55	140.29	1.35846	0	0	yes	up
ENSG00000146648	5433.99	1148	36.18	9.52	-2.14281	0	0	yes	down
ENSG00000106397	2527	9588.09	73.63	458.62	2.02389	0	0	yes	up
ENSG00000132510	738.11	4199.73	6.96	46.87	2.60846	0	0	yes	up
ENSG00000108846	6342.18	1516.04	124.01	27.36	-1.9646	0	0	yes	down
ENSG00000183421	3311	251	51.73	4.72	-3.62143	0	0	yes	down
ENSG00000155304	1493	5670	22.71	103.72	2.02521	0	0	yes	up
ENSG00000169242	3012	157	127.34	8.96	-4.16181	0	0	yes	down
ENSG00000120053	1327	5357	58.55	283.03	2.11333	0	0	yes	up
ENSG00000184575	3360	8745.62	38.36	122.78	1.48017	0	0	yes	up
ENSG00000088038	2319.06	7085.43	57.79	207.62	1.71139	0	0	yes	up
ENSG00000101782	2273	6997.03	59.67	235.51	1.72222	0	0	yes	up
ENSG00000118680	11960.2	20393.3	745.54	1523.08	0.869931	0	0	no	up
ENSG00000178607	427	3457	5.95	52.55	3.11729	0	0	yes	up
ENSG00000125726	8019.92	2408.34	612.38	253.63	-1.63547	0	0	yes	down
ENSG00000211448	3245	245	60.01	7.17	-3.62729	0	0	yes	down
ENSG00000154727	1603.32	5817	19.77	84.35	1.95929	0	0	yes	up
ENSG00000127399	7004.1	1881.18	218.33	77.44	-1.79649	0	0	yes	down
ENSG00000186350	4413	681	60.77	11.77	-2.59596	0	0	yes	down
ENSG00000136238	5493	11792	197.39	433.85	1.20222	0	0	yes	up
ENSG00000223764	4921	657	74.03	11.5	-2.80491	0	0	yes	down
ENSG00000113368	4070	348	89.32	9.07	-3.44779	0	0	yes	down
ENSG00000090861	13540	5724	249.95	127.18	-1.14206	0	0	yes	down
ENSG00000148344	9616	2876	367.25	131.57	-1.6413	0	0	yes	down
ENSG00000122257	2242	8624	43.67	169.03	2.04365	0	0	yes	up
ENSG00000159720	8637	18507.3	370.21	888.36	1.19957	0	0	yes	up
ENSG00000090060	4837	12899	82.18	290.17	1.51515	0	0	yes	up
ENSG00000196182	1156	6375	20.27	135.57	2.56336	0	0	yes	up
ENSG00000135046	9779	19962	459.74	1120.15	1.12957	0	0	yes	up
ENSG00000160570	587	5026	29.01	257.61	3.19805	0	0	yes	up
ENSG00000135111	603	5059	10.82	92.35	3.1687	0	0	yes	up
ENSG00000114867	16573	29185	288.28	624.64	0.916467	0	0	no	up
ENSG00000187514	20366	8570.93	1327.57	646.61	-1.14856	0	0	yes	down
ENSG00000197694	22585	10093	322.61	226.31	-1.06193	0	0	yes	down
ENSG00000019144	5501.56	635.16	116.88	17.13	-3.01457	0	0	yes	down
ENSG00000067334	1487.76	6858.54	31.03	202.18	2.30483	0	0	yes	up
ENSG00000170421	67882.8	43114.6	2428.47	1859.73	-0.554795	0	0	no	down
ENSG00000143761	9233	18766	337.98	932.16	1.12332	0	0	yes	up
ENSG00000198576	7	4745	0.15	135.91	9.50491	0	0	yes	up
ENSG00000109332	3711	10623.8	153.07	485.48	1.6175	0	0	yes	up
ENSG00000078246	1132	6229	28.7	171.76	2.5602	0	0	yes	up
ENSG00000197622	1487.5	6730.81	32.85	166.81	2.27797	0	0	yes	up
ENSG00000144597	990.26	6162.26	16	105.09	2.73766	0	0	yes	up
ENSG00000004478	3420	10735	58.46	219.85	1.75033	0	0	yes	up
ENSG00000156261	7771	17871	259.36	751.52	1.30152	0	0	yes	up
ENSG00000137497	11763.9	3121.92	162.64	56.94	-1.81379	0	0	yes	down
ENSG00000140943	10296	2420	154.86	44.87	-1.98893	0	0	yes	down
ENSG00000044115	19761	33727	347.95	707.71	0.871323	0	0	no	up
ENSG00000011426	6280	15493	93.45	263.85	1.40286	0	0	yes	up
ENSG00000137575	4122	12117	134.94	469.46	1.65569	0	0	yes	up
ENSG00000112335	2859	9932	116.92	483.16	1.89665	0	0	yes	up
ENSG00000150457	942	6059	10.12	79.02	2.78536	0	0	yes	up
ENSG00000187634	7342.81	1166.39	174.15	36.37	-2.55421	0	0	yes	down
ENSG00000072682	1010	6315	30.06	229.1	2.7445	0	0	yes	up
ENSG00000107581	9656	20210	103.62	265.64	1.16565	0	0	yes	up
ENSG00000268858	1462.11	7263.36	13.6	56.67	2.41266	0	0	yes	up
ENSG00000100906	4358	61	228.71	3.97	-6.05864	0	0	yes	down
ENSG00000065154	3432	10818	113.19	431.28	1.75639	0	0	yes	up
ENSG00000143819	10251	20963	465.11	1128.78	1.13216	0	0	yes	up
ENSG00000134333	32877	16458	1229.18	766.32	-0.898214	0	0	no	down
ENSG00000023287	597	5353	8.23	70.16	3.26462	0	0	yes	up
ENSG00000100401	6173	14340	125.81	353.91	1.31608	0	0	yes	up
ENSG00000135048	656.56	5140.53	11.98	127.21	3.06899	0	0	yes	up
ENSG00000166741	6342	1052	420.13	90.63	-2.49173	0	0	yes	down
ENSG00000128710	6780	1360.23	68.61	16.99	-2.21736	0	0	yes	down
ENSG00000110047	5538	842	92.65	18.02	-2.6174	0	0	yes	down
ENSG00000167996	242671	188875	24728	24296.3	-0.261491	0	0	no	down
ENSG00000148396	5767	13234.6	58.77	173.03	1.2985	0	0	yes	up
ENSG00000083896	2135	7512	42.45	178.76	1.91504	0	0	yes	up
ENSG00000100393	6075	13646	52.92	149.86	1.2676	0	0	yes	up
ENSG00000170540	8030.58	16343.2	219.86	551.57	1.12519	0	0	yes	up
ENSG00000104419	2933	9267	97.58	349.32	1.7598	0	0	yes	up
ENSG00000189067	6152	13705	183.3	494.64	1.25565	0	0	yes	up
ENSG00000131747	10763	3452	114.78	47.38	-1.5405	0	0	yes	down
ENSG00000122884	877	5030	20.15	138.09	2.61998	0	0	yes	up
ENSG00000056097	4280	10924	67.42	190	1.45189	0	0	yes	up
ENSG00000132600	4943.93	642.94	241.84	37.13	-2.84283	0	0	yes	down
ENSG00000185022	216.88	3426	5.57	106.61	4.08163	0	0	yes	up
ENSG00000132646	6160	1152	333.84	74.53	-2.31871	0	0	yes	down
ENSG00000165671	5572	906	30.16	6.61	-2.52054	0	0	yes	down
ENSG00000118496	1221	5696	7.84	44.08	2.32196	0	0	yes	up
ENSG00000188522	651	4657.99	7.43	66.37	2.93905	0	0	yes	up
ENSG00000116133	10883.9	3418.97	155.72	59.44	-1.57048	0	0	yes	down
ENSG00000131236	6639	14406	204.06	541.64	1.21771	0	0	yes	up
ENSG00000137409	5057	12294	171.71	501.47	1.38168	0	0	yes	up
ENSG00000134107	4498	386	83.13	7.94	-3.44254	0	0	yes	down
ENSG00000171345	4314	328	228.32	20.33	-3.61718	0	0	yes	down
ENSG00000137801	2574	8497	25.17	98.78	1.82302	0	0	yes	up
ENSG00000172943	1743	7009	22.6	98.59	2.10771	0	0	yes	up
ENSG00000082153	9024.9	18078	190.42	446.24	1.10233	0	0	yes	up
ENSG00000118523	290	3852	8	127.46	3.83156	0	0	yes	up
ENSG00000105321	835.07	4880.73	25.34	168.16	2.6472	0	0	yes	up
ENSG00000126838	3876.92	189.95	50.53	12.27	-4.25114	0	0	yes	down
ENSG00000162616	333	3948	11.6	115.48	3.6676	0	0	yes	up
ENSG00000164463	161	3476	2.03	57.35	4.53237	0	0	yes	up
ENSG00000119041	1509	6512	23.14	143.66	2.20958	0	0	yes	up
ENSG00000129474	5114	637	83.57	13.15	-2.90501	0	0	yes	down
ENSG00000068308	2131	7629	53.92	233.54	1.94004	0	0	yes	up
ENSG00000136205	9063	2435	76.46	23.59	-1.79599	0	0	yes	down
ENSG00000177606	575	4499	9.96	93.64	3.06805	0	0	yes	up
ENSG00000072364	5414	13036	35.74	102.82	1.36781	0	0	yes	up
ENSG00000099860	870	5333	47.17	338.92	2.71594	0	0	yes	up
ENSG00000136450	7810.59	3503.77	193.3	88.99	-1.05645	3.23662e-307	8.91545e-307	yes	down
ENSG00000229807	49211.8	35443.3	294.42	402.74	-0.373415	6.55079e-307	1.80167e-306	no	down
ENSG00000112984	5446	2033	118.47	51.99	-1.32151	9.46594e-306	2.59941e-305	yes	down
ENSG00000166813	2967.1	682	39.9	11.06	-2.02113	1.00352e-305	2.75151e-305	yes	down
ENSG00000112078	1790	186	24.16	3.22	-3.16651	2.19021e-304	5.99597e-304	yes	down
ENSG00000156508	132681	106274	4236.18	4015.04	-0.220101	3.35874e-304	9.1809e-304	no	down
ENSG00000167747	2494	469	116.16	26.02	-2.31073	7.92695e-304	2.16346e-303	yes	down
ENSG00000197451	6701.98	11031	264.38	533.13	0.818974	1.60767e-303	4.38101e-303	no	up
ENSG00000121774	5980	10118	141.96	289.41	0.858782	6.28183e-302	1.70923e-301	no	up
ENSG00000160208	2787	606	32.72	8.54	-2.10125	6.54159e-302	1.7772e-301	yes	down
ENSG00000115053	14437	20122	294.29	496.68	0.579078	6.1928e-301	1.67988e-300	no	up
ENSG00000197372	5670.55	2188.55	348.11	163.81	-1.27344	1.27184e-300	3.4448e-300	yes	down
ENSG00000006534	3800	1123	99.23	34.85	-1.65857	4.999e-299	1.35193e-298	yes	down
ENSG00000112297	2485	477	20.71	4.08	-2.28111	4.17715e-298	1.12796e-297	yes	down
ENSG00000138413	6528	2732	182.38	89.2	-1.15661	2.54356e-297	6.85798e-297	yes	down
ENSG00000184939	1335	45	35.27	3.26	-4.7907	5.20587e-296	1.4015e-295	yes	down
ENSG00000136560	807	2854	42.1	145.6	1.92242	3.69609e-295	9.93539e-295	yes	up
ENSG00000099849	1873	231	94.57	11.58	-2.91931	5.37192e-295	1.44184e-294	yes	down
ENSG00000276550	2534.28	505.76	28.14	6.56	-2.22498	6.04987e-295	1.62136e-294	yes	down
ENSG00000239306	2241.81	5101.75	59.72	176.53	1.2864	1.52195e-294	4.07269e-294	yes	up
ENSG00000181090	3116.99	785.24	73.46	25.23	-1.88887	9.35452e-294	2.49949e-293	yes	down
ENSG00000161204	1890	240	60.94	11.33	-2.8772	2.06633e-293	5.5129e-293	yes	down
ENSG00000114098	1774	197	43.51	5.45	-3.07066	2.43105e-293	6.47627e-293	yes	down
ENSG00000184916	1849	224.67	27.14	3.53	-2.94079	2.4465e-293	6.5077e-293	yes	down
ENSG00000176383	59.91	1264.29	4.16	33.25	4.49946	3.23965e-293	8.60461e-293	yes	up
ENSG00000166986	3469	6798.56	143.46	308.62	1.07078	4.3677e-293	1.15835e-292	yes	up
ENSG00000112159	2111	328	10.24	1.53	-2.58608	7.19701e-293	1.90587e-292	yes	down
ENSG00000214021	497.67	2264.52	12.44	54.56	2.28602	5.68781e-292	1.50398e-291	yes	up
ENSG00000110497	944	3076	12.31	52.26	1.80427	5.89576e-292	1.55665e-291	yes	up
ENSG00000110906	2366.09	5257.08	37.34	107.58	1.25183	6.54071e-291	1.72438e-290	yes	up
ENSG00000119333	7492	3381	331.99	170.17	-1.04783	7.0852e-291	1.86518e-290	yes	down
ENSG00000163349	2091	4857	17.16	54.87	1.31595	1.76266e-290	4.63335e-290	yes	up
ENSG00000173821	6919.43	3015.02	45.68	38.57	-1.09841	4.4271e-290	1.162e-289	yes	down
ENSG00000173218	1596	140	15.31	1.12	-3.41089	1.94621e-289	5.10079e-289	yes	down
ENSG00000185567	4351.95	1460.75	30.79	22.38	-1.47488	1.09376e-288	2.86241e-288	yes	down
ENSG00000104824	6970.97	11221	265.77	506.41	0.786844	2.6551e-288	6.9383e-288	no	up
ENSG00000128928	2883.25	685.13	80.66	24.8	-1.97317	5.02981e-288	1.31246e-287	yes	down
ENSG00000135679	1868.7	241.16	28.46	5.55	-2.8539	8.83379e-288	2.30169e-287	yes	down
ENSG00000180185	1618.26	151	106.05	7.82	-3.32175	4.36611e-287	1.13595e-286	yes	down
ENSG00000074071	3908	1220	316.41	115.25	-1.57947	9.74914e-287	2.53278e-286	yes	down
ENSG00000108448	1616.61	151.44	53.04	5.44	-3.31608	2.20526e-286	5.72084e-286	yes	down
ENSG00000064666	5378.87	9226.68	170.08	347.28	0.878584	2.62403e-286	6.79731e-286	no	up
ENSG00000176986	3628.43	6959.61	49.69	114.57	1.03974	5.35817e-286	1.38597e-285	yes	up
ENSG00000166925	3014.47	6125.41	96.82	226.36	1.12298	2.78573e-285	7.19525e-285	yes	up
ENSG00000205609	4525.65	8127.57	83.92	180.01	0.944774	5.1145e-285	1.31911e-284	no	up
ENSG00000147065	25145	31769	387.12	588.27	0.437423	5.34913e-285	1.37763e-284	no	up
ENSG00000087077	3048	775	126.69	40.4	-1.87552	1.37541e-284	3.53716e-284	yes	down
ENSG00000158286	1977.64	290.13	69.37	12.44	-2.66893	5.05936e-284	1.29925e-283	yes	down
ENSG00000110719	3645.87	1086.61	109.07	42.72	-1.64635	5.35954e-284	1.37435e-283	yes	down
ENSG00000138821	3808	1175	76.75	27.63	-1.5963	9.54345e-284	2.44372e-283	yes	down
ENSG00000173391	3966	1263	124.54	41.47	-1.55075	2.43717e-283	6.23175e-283	yes	down
ENSG00000170502	483	2197	20.97	122.02	2.28551	2.95913e-283	7.55552e-283	yes	up
ENSG00000160957	3167	840	91.02	36.07	-1.81458	1.0173e-282	2.59374e-282	yes	down
ENSG00000137834	1521	124	22.64	2.06	-3.51653	1.06957e-282	2.72311e-282	yes	down
ENSG00000157617	1792	221	23.27	8.77	-2.91938	2.44279e-282	6.21047e-282	yes	down
ENSG00000260342	38.18	1169.22	4.74	170.77	5.03666	3.82461e-282	9.7097e-282	yes	up
ENSG00000104064	966.11	3062.08	24.44	97.24	1.76433	7.38111e-282	1.87121e-281	yes	up
ENSG00000247315	703	2604	12.92	57.5	1.98921	7.69868e-282	1.94895e-281	yes	up
ENSG00000006744	3493.04	1013	82.54	31.53	-1.68577	1.99787e-281	5.05049e-281	yes	down
ENSG00000225807	1957.66	287.39	31.01	5.28	-2.66797	4.56766e-281	1.15304e-280	yes	down
ENSG00000112118	5023	1880	106.68	50.32	-1.31774	6.16673e-281	1.5545e-280	yes	down
ENSG00000172757	13680.5	19013.2	830.54	1375.11	0.574959	7.39693e-281	1.86198e-280	no	up
ENSG00000054523	2672.08	601.44	20.98	6.41	-2.0514	7.52939e-281	1.89265e-280	yes	down
ENSG00000110048	2315	5118	27.88	75.65	1.24464	9.5874e-281	2.40657e-280	yes	up
ENSG00000117479	378.43	1973	5.52	32	2.48237	2.59628e-280	6.50785e-280	yes	up
ENSG00000244462	2699.12	5655.31	43.74	134.21	1.16719	3.04268e-280	7.6161e-280	yes	up
ENSG00000147454	1891	263	40.33	11.12	-2.74594	6.15747e-280	1.53911e-279	yes	down
ENSG00000173905	2949	738	45.07	13.87	-1.89846	6.3756e-280	1.5914e-279	yes	down
ENSG00000138768	1480	3876	22.08	71.46	1.48905	1.35252e-279	3.37127e-279	yes	up
ENSG00000197019	404	2022	12.56	77.86	2.42343	1.88195e-279	4.68438e-279	yes	up
ENSG00000111276	1580	149	37.93	4.51	-3.30647	2.92832e-279	7.27874e-279	yes	down
ENSG00000140950	2120.04	358.41	28.87	6.52	-2.46433	1.06747e-278	2.64963e-278	yes	down
ENSG00000103342	12595	17743	245.69	457	0.594474	2.64464e-278	6.55532e-278	no	up
ENSG00000158470	5232	8970	66.3	136.76	0.877821	5.40346e-278	1.33751e-277	no	up
ENSG00000147162	16413	9792	176.7	123.74	-0.645088	6.87363e-278	1.69905e-277	no	down
ENSG00000090376	1504	125.07	11.38	1.1	-3.48792	8.72517e-278	2.15374e-277	yes	down
ENSG00000181649	995	3088	86.66	318.97	1.73398	1.73633e-277	4.28006e-277	yes	up
ENSG00000171456	6170	2602	110.17	60.23	-1.14557	6.97013e-277	1.71577e-276	yes	down
ENSG00000139496	1475	3852	20.49	60.46	1.48497	9.32456e-277	2.29217e-276	yes	up
ENSG00000166226	5250	8981	210.59	412.27	0.874634	1.23823e-276	3.03964e-276	no	up
ENSG00000189223	1876	264	61.64	10.13	-2.72897	6.0585e-276	1.48521e-275	yes	down
ENSG00000162695	852	2830.02	8.96	34.43	1.83196	2.11379e-274	5.17471e-274	yes	up
ENSG00000152818	3485	1032	21.06	8.34	-1.65564	9.85349e-274	2.4089e-273	yes	down
ENSG00000130635	8536	4173	67.21	38.23	-0.9324	2.86191e-273	6.98698e-273	no	down
ENSG00000188157	22566	14531	201.04	147.01	-0.534942	4.67201e-273	1.13905e-272	no	down
ENSG00000197183	1363	85	17.79	3.19	-3.9031	4.96688e-273	1.20929e-272	yes	down
ENSG00000103111	1971	4569	43.32	136.01	1.31303	1.87875e-272	4.56793e-272	yes	up
ENSG00000234616	3640	1123	55.72	20.71	-1.59651	2.25459e-271	5.47428e-271	yes	down
ENSG00000169217	2039	4658	42.43	104.09	1.29192	6.84913e-271	1.66075e-270	yes	up
ENSG00000157349	2532.54	559.24	72.04	21.52	-2.07897	7.29049e-271	1.76537e-270	yes	down
ENSG00000124882	2514	551	35.14	9.61	-2.08979	1.13754e-270	2.75077e-270	yes	down
ENSG00000109445	345	1861	13.08	87.38	2.53148	2.11344e-270	5.10375e-270	yes	up
ENSG00000186834	2983	5976	50.7	122.11	1.10249	2.75771e-270	6.6506e-270	yes	up
ENSG00000177311	5908	2468	77.23	35.51	-1.15925	2.92386e-270	7.04176e-270	yes	down
ENSG00000103187	13074	18192	493.41	811.49	0.576679	3.00473e-270	7.22674e-270	no	up
ENSG00000274917	954.99	2982.55	7.38	27.8	1.74306	4.93668e-270	1.18573e-269	yes	up
ENSG00000159658	3039	811	34.94	12.76	-1.80575	1.39544e-269	3.34717e-269	yes	down
ENSG00000135723	3026.47	805.18	70.01	31.57	-1.81018	2.23714e-269	5.3589e-269	yes	down
ENSG00000148700	4193	1440	86.01	26.89	-1.44184	4.96588e-269	1.18794e-268	yes	down
ENSG00000140464	2900	743	55.69	17.67	-1.86454	9.47892e-269	2.26452e-268	yes	down
ENSG00000182149	3911.7	7198.29	159.15	356.79	0.979934	2.13807e-268	5.10103e-268	no	up
ENSG00000160271	1670	199	32.12	3.82	-2.96893	1.32448e-267	3.15574e-267	yes	down
ENSG00000171566	1260	3464	39.42	112.3	1.55909	1.85742e-267	4.41961e-267	yes	up
ENSG00000125148	5890	2471	701.44	345.19	-1.1531	3.53871e-267	8.4089e-267	yes	down
ENSG00000171552	3880.35	1270.95	114.22	46.02	-1.5102	9.25521e-267	2.19635e-266	yes	down
ENSG00000257671	1187.19	36.44	48.08	1.77	-4.92581	8.75155e-266	2.07407e-265	yes	down
ENSG00000213585	5890.88	9684	214.58	431.3	0.817195	1.00361e-265	2.37535e-265	no	up
ENSG00000188242	1514.1	146.53	91.66	12.15	-3.26912	4.05255e-265	9.57884e-265	yes	down
ENSG00000181026	1688	211	35.41	6.06	-2.89992	2.46993e-264	5.83033e-264	yes	down
ENSG00000174307	1367	99	42.23	4.97	-3.68737	1.90189e-263	4.48352e-263	yes	down
ENSG00000131165	7444	3497	213.39	139.26	-0.989885	2.26193e-263	5.32525e-263	no	down
ENSG00000153048	2921.96	768.95	197.49	51.68	-1.8259	3.18872e-263	7.49728e-263	yes	down
ENSG00000175054	2546	584	21.72	8.92	-2.02412	3.86162e-263	9.06741e-263	yes	down
ENSG00000197555	2950	784	50.68	14.13	-1.81171	6.29047e-263	1.47511e-262	yes	down
ENSG00000159128	1792	255	65.99	10.72	-2.71293	4.6494e-262	1.08885e-261	yes	down
ENSG00000189091	18293.1	11364.9	407.32	274.34	-0.586646	1.56261e-261	3.65469e-261	no	down
ENSG00000187134	3388.51	1018.07	134.49	53.13	-1.63474	1.84885e-261	4.31851e-261	yes	down
ENSG00000067064	1290	3476.5	43.32	158.71	1.53034	2.96452e-261	6.91539e-261	yes	up
ENSG00000135476	1394	111	18.49	2.15	-3.55052	3.38331e-261	7.882e-261	yes	down
ENSG00000187742	813	2696	12.82	42.57	1.82957	4.80085e-261	1.11698e-260	yes	up
ENSG00000119285	2462.45	549.48	17.89	4.31	-2.06388	5.35636e-261	1.2446e-260	yes	down
ENSG00000215014	38.04	1086.15	1.19	40.7	4.93564	8.02842e-261	1.86305e-260	yes	up
ENSG00000006704	1362	101	28.97	2.05	-3.65322	9.81612e-261	2.27494e-260	yes	down
ENSG00000115091	7190	11209	195.98	357.03	0.740669	1.60865e-259	3.72329e-259	no	up
ENSG00000153395	1639	202	27.48	3.72	-2.92031	1.69563e-258	3.91952e-258	yes	down
ENSG00000166747	3914	7122.01	55.36	178.55	0.963716	2.30622e-258	5.32402e-258	no	up
ENSG00000062716	3588	1137	108.41	40.37	-1.55787	3.02804e-258	6.98132e-258	yes	down
ENSG00000128245	5531	2291	204.52	101.41	-1.17149	2.16637e-257	4.98825e-257	yes	down
ENSG00000072401	705	2484	16.97	72.1	1.91705	3.21004e-256	7.38185e-256	yes	up
ENSG00000171492	2620	637	63.73	19.32	-1.94013	3.45811e-256	7.94207e-256	yes	down
ENSG00000167995	1365.81	108.45	33.61	3.04	-3.55458	3.50941e-256	8.0495e-256	yes	down
ENSG00000136527	5010	1975	146.57	73.23	-1.24288	5.06185e-256	1.15954e-255	yes	down
ENSG00000106211	5806	9487.89	523.51	1007.62	0.808618	9.56049e-256	2.18725e-255	no	up
ENSG00000052850	1233	68	15.59	1.24	-4.08042	5.31011e-254	1.21329e-253	yes	down
ENSG00000103035	3766.15	6893.21	179.47	368.08	0.972161	9.30084e-254	2.1224e-253	no	up
ENSG00000176915	4080.49	7297.59	66.73	132.79	0.938753	2.0165e-253	4.59565e-253	no	up
ENSG00000111670	1855	296	20.77	3.89	-2.54767	2.10111e-253	4.78237e-253	yes	down
ENSG00000084234	32758.7	39379.1	719.91	1013	0.365626	2.3279e-253	5.29182e-253	no	up
ENSG00000099622	4306	1566	390.85	152.76	-1.35919	8.82457e-253	2.00346e-252	yes	down
ENSG00000168453	3064	873	52.94	13.45	-1.71129	2.27441e-252	5.15707e-252	yes	down
ENSG00000150782	1469	150	62.32	10.65	-3.19172	5.84401e-252	1.3234e-251	yes	down
ENSG00000164823	604	2280	10.56	40.32	2.01649	1.9658e-251	4.44599e-251	yes	up
ENSG00000124181	4216	1520	95.23	33.46	-1.37173	5.24889e-251	1.18562e-250	yes	down
ENSG00000185722	3352.24	1032.76	30.06	11.97	-1.59855	1.51437e-250	3.41635e-250	yes	down
ENSG00000108106	8029.4	12116	437.95	924.06	0.69362	3.82415e-250	8.61617e-250	no	up
ENSG00000090020	1381	3553	20.6	73	1.4634	5.57138e-250	1.2537e-249	yes	up
ENSG00000103479	3530.58	1133.98	52.61	17.32	-1.53843	1.4727e-249	3.30977e-249	yes	down
ENSG00000140350	3445	1087	158.87	72.34	-1.56408	1.81561e-249	4.07528e-249	yes	down
ENSG00000198826	2687.87	688.48	33.59	19	-1.8649	2.60269e-249	5.8346e-249	yes	down
ENSG00000047056	733.06	2499	7.8	21.55	1.86942	2.94278e-249	6.58872e-249	yes	up
ENSG00000125970	6428	10187	258.32	518.55	0.764363	3.27639e-249	7.32644e-249	no	up
ENSG00000188549	1251.98	81	19.79	1.41	-3.85007	9.66783e-249	2.15915e-248	yes	down
ENSG00000175224	1990.87	4445.82	46.95	105.12	1.25913	1.4185e-248	3.16401e-248	yes	up
ENSG00000103932	1077	3064	16.87	58.07	1.60847	1.10984e-247	2.47245e-247	yes	up
ENSG00000159593	5448	2285	220.07	112.51	-1.15346	2.08105e-247	4.63026e-247	yes	down
ENSG00000141258	2539	622	51.38	15.27	-1.9292	1.71909e-246	3.82015e-246	yes	down
ENSG00000091140	4531	1725	277.76	125.81	-1.29316	2.10667e-246	4.67559e-246	yes	down
ENSG00000184292	2026	383	55.55	12.6	-2.30314	2.98723e-246	6.62169e-246	yes	down
ENSG00000136807	1941	347	65.71	15.07	-2.38372	9.25885e-246	2.04983e-245	yes	down
ENSG00000178104	2963.09	840.26	35.49	14.82	-1.71812	1.73582e-245	3.83819e-245	yes	down
ENSG00000168994	627.11	2293.29	23.1	97.13	1.9707	1.84946e-245	4.08439e-245	yes	up
ENSG00000090520	1938.63	4349.96	78.04	197.6	1.26604	2.47924e-245	5.46843e-245	yes	up
ENSG00000165175	1440	150	39.23	4.26	-3.16296	4.82318e-245	1.06253e-244	yes	down
ENSG00000185033	1528	183	29.87	4.61	-2.96165	1.87868e-244	4.13355e-244	yes	down
ENSG00000008300	4542	1740	40.1	17.6	-1.28417	2.34652e-244	5.15655e-244	yes	down
ENSG00000134982	1750	270	21.81	2.96	-2.59625	3.38897e-244	7.4382e-244	yes	down
ENSG00000088280	1616	217	30.28	4.67	-2.79659	4.31665e-244	9.46264e-244	yes	down
ENSG00000189241	1727.66	4035.7	32.04	89.94	1.32407	5.26388e-244	1.15249e-243	yes	up
ENSG00000164327	2172	455	13.81	3.58	-2.15501	2.47904e-243	5.42104e-243	yes	down
ENSG00000179409	1410	142	23.88	3.07	-3.21166	2.93679e-243	6.41415e-243	yes	down
ENSG00000120889	3565	6547	80.18	148.78	0.977007	4.22021e-243	9.20593e-243	no	up
ENSG00000173933	2963.98	5749.83	158.05	286.96	1.05606	1.05561e-242	2.29989e-242	yes	up
ENSG00000275757	4817.75	8143.02	97.49	197.97	0.85728	1.11299e-242	2.42195e-242	no	up
ENSG00000179134	2736	5442.03	63.96	182	1.09215	1.26482e-242	2.74898e-242	yes	up
ENSG00000165527	2549.67	638.65	160.99	65.67	-1.89714	4.41578e-242	9.58562e-242	yes	down
ENSG00000112983	2260	4782	81.35	185.51	1.18137	7.39311e-242	1.60292e-241	yes	up
ENSG00000185024	1395.59	139.31	32.06	4.08	-3.22443	1.23804e-241	2.68097e-241	yes	down
ENSG00000108179	2780	5492	141.87	331.51	1.08232	2.68589e-241	5.80921e-241	yes	up
ENSG00000167173	1074	32	15.92	0.54	-4.9687	3.07612e-241	6.64516e-241	yes	down
ENSG00000181555	3153	955	26.48	10.21	-1.62308	5.73852e-241	1.23816e-240	yes	down
ENSG00000162496	2347	546	114.34	33.12	-2.00377	1.35639e-239	2.92304e-239	yes	down
ENSG00000264364	2750	748	23.72	7.75	-1.77825	4.43458e-239	9.54506e-239	yes	down
ENSG00000131100	4248	7390	221.56	464.08	0.898866	1.09319e-238	2.35017e-238	no	up
ENSG00000136870	657	2312.08	9.76	34.16	1.9153	2.40069e-238	5.15483e-238	yes	up
ENSG00000078304	2987	875	86.72	35.64	-1.67127	4.70578e-238	1.00922e-237	yes	down
ENSG00000100650	6293	2876	338.26	208.81	-1.02961	8.74837e-238	1.87396e-237	yes	down
ENSG00000206149	1259.83	98.62	24.39	3.57	-3.57513	1.6724e-237	3.57809e-237	yes	down
ENSG00000062822	2720	738	77.54	27.6	-1.78184	3.7745e-237	8.06584e-237	yes	down
ENSG00000105443	2502.98	5084.46	60.57	184.97	1.12252	5.2678e-237	1.12434e-236	yes	up
ENSG00000177303	1731	276	24.01	4.19	-2.54879	1.01136e-236	2.15603e-236	yes	down
ENSG00000158042	1585	218	93.45	13.83	-2.76201	2.0813e-236	4.43165e-236	yes	down
ENSG00000068028	1816.63	313	67.91	13.67	-2.43695	4.32446e-236	9.19696e-236	yes	down
ENSG00000120738	428	1879	8.47	44.65	2.23436	4.93874e-236	1.04908e-235	yes	up
ENSG00000077514	1536	200	33.48	5.04	-2.84103	7.4761e-236	1.58618e-235	yes	down
ENSG00000125835	8087.86	12029.9	572.4	979.51	0.67287	1.53013e-235	3.24256e-235	no	up
ENSG00000116752	1082	3005	61.44	210.92	1.57374	1.86329e-235	3.94388e-235	yes	up
ENSG00000185818	1343	130	14.08	1.64	-3.2688	2.21842e-235	4.69e-235	yes	down
ENSG00000101843	1855	4165	101.95	246	1.26697	2.94271e-235	6.21384e-235	yes	up
ENSG00000111057	23294	15545.4	1049.16	834.91	-0.483391	1.27948e-234	2.69857e-234	no	down
ENSG00000160094	1144	65	32.46	3.01	-4.03743	2.34204e-234	4.93378e-234	yes	down
ENSG00000140836	1109.94	54.49	4.1	0.26	-4.24827	5.19316e-234	1.09271e-233	yes	down
ENSG00000196074	2948	867	60.3	15.69	-1.66556	7.64638e-234	1.607e-233	yes	down
ENSG00000105281	3875.48	6871.41	100.83	208.21	0.926306	1.65897e-233	3.48247e-233	no	up
ENSG00000075856	2200	4641	43.55	103.93	1.17701	2.00942e-233	4.21316e-233	yes	up
ENSG00000168040	1022	23	37.38	1.01	-5.37354	2.06356e-233	4.32159e-233	yes	down
ENSG00000114573	4347	7469.59	57.78	118.72	0.881084	2.73236e-233	5.7155e-233	no	up
ENSG00000110911	1390	150	28.1	5.08	-3.11198	3.71506e-233	7.76198e-233	yes	down
ENSG00000151090	1336	131	15.51	3.42	-3.25021	5.14139e-233	1.07295e-232	yes	down
ENSG00000128590	287	1580	12.01	72.51	2.56088	7.50362e-233	1.56409e-232	yes	up
ENSG00000117222	745.01	2437.29	10.34	41.55	1.81002	8.82135e-233	1.83661e-232	yes	up
ENSG00000113712	6428.02	10026	142.93	290.97	0.741376	9.93031e-233	2.06508e-232	no	up
ENSG00000083223	833	2585	11.7	48.66	1.73385	1.31002e-232	2.7211e-232	yes	up
ENSG00000112658	1285	3305	18.46	57.11	1.46296	1.41792e-232	2.94181e-232	yes	up
ENSG00000147050	2443	4971	35.81	93.4	1.12496	1.44953e-232	3.00389e-232	yes	up
ENSG00000137699	14246	8584	380.55	282.62	-0.63076	4.32071e-232	8.9435e-232	no	down
ENSG00000008128	1886.19	4187.38	79.55	289.68	1.25065	8.33752e-232	1.72379e-231	yes	up
ENSG00000165792	1478.99	185	86.67	11.62	-2.89894	8.6476e-232	1.78583e-231	yes	down
ENSG00000135720	13234	7834.15	269.78	166.83	-0.656325	2.25092e-231	4.64304e-231	no	down
ENSG00000118762	2037.12	420	26.42	8.51	-2.17799	2.26887e-231	4.67466e-231	yes	down
ENSG00000011007	2195.14	494.01	36.34	12.48	-2.05163	3.91541e-231	8.05777e-231	yes	down
ENSG00000128159	1851.06	338.13	32.01	7.07	-2.35263	6.69317e-231	1.37584e-230	yes	down
ENSG00000132793	1312.98	126.32	36.01	2.74	-3.27761	1.06661e-230	2.18999e-230	yes	down
ENSG00000043143	2645	718	30.99	10.64	-1.78114	1.52143e-230	3.12025e-230	yes	down
ENSG00000163512	1383.19	3442.18	65.28	141.65	1.4154	1.59591e-230	3.26922e-230	yes	up
ENSG00000198355	3156	990	91.36	33.82	-1.57252	1.68229e-230	3.44222e-230	yes	down
ENSG00000161996	2860.09	831.03	67.4	27.28	-1.68301	2.76471e-230	5.65052e-230	yes	down
ENSG00000186185	1322	131	18.38	2.27	-3.23501	1.16687e-229	2.38212e-229	yes	down
ENSG00000198732	2160	481	50.3	14.77	-2.06685	1.27686e-229	2.60368e-229	yes	down
ENSG00000123384	5998	2726	29.19	16.4	-1.03762	1.30199e-229	2.65189e-229	yes	down
ENSG00000166847	3061.44	5779	35.58	99.44	1.01668	2.61532e-229	5.3208e-229	yes	up
ENSG00000237172	3530.09	1204.32	75.75	31.04	-1.45141	4.53508e-229	9.21598e-229	yes	down
ENSG00000040275	1571	226	51.19	10.46	-2.69721	1.33657e-228	2.71301e-228	yes	down
ENSG00000068745	3918	6877	209.46	385.87	0.911737	1.3272e-227	2.69093e-227	no	up
ENSG00000101224	5388	2342	121.02	63.72	-1.10193	1.65288e-227	3.34745e-227	yes	down
ENSG00000162591	2977	903	57.47	16.37	-1.62099	3.23374e-227	6.54162e-227	yes	down
ENSG00000087460	39419	45847	1637.8	2360.64	0.318011	3.79027e-227	7.65875e-227	no	up
ENSG00000066455	1467	3547	31.75	103.33	1.37381	4.53601e-227	9.15523e-227	yes	up
ENSG00000127870	1078	2949.9	23.89	74.54	1.55238	1.1686e-226	2.35597e-226	yes	up
ENSG00000182749	1761	308	33.74	7.05	-2.41532	1.3601e-226	2.73894e-226	yes	down
ENSG00000219481	1567.72	228.24	26.48	4.26	-2.67997	1.38681e-226	2.78958e-226	yes	down
ENSG00000048707	2982	908	16.92	7.15	-1.61544	1.7412e-226	3.49848e-226	yes	down
ENSG00000163808	1303	129	25.5	2.8	-3.23632	1.8094e-226	3.63142e-226	yes	down
ENSG00000130558	2550	5073	85.91	140.54	1.09242	2.11336e-226	4.23669e-226	yes	up
ENSG00000110321	27457	33255	556.55	798.28	0.376472	3.64972e-226	7.30846e-226	no	up
ENSG00000112304	423.58	1825.4	7.8	33.64	2.20758	5.15266e-226	1.03065e-225	yes	up
ENSG00000143418	3498.32	6324.18	117.1	253.09	0.954291	5.90491e-226	1.17979e-225	no	up
ENSG00000105538	2093	459	67.97	18.97	-2.08893	1.39393e-225	2.78193e-225	yes	down
ENSG00000149925	18620.3	23741	1124.55	1706.04	0.450576	2.47462e-225	4.93318e-225	no	up
ENSG00000089737	5361.04	8658	139.8	254.37	0.791596	3.15294e-225	6.2784e-225	no	up
ENSG00000204054	2419.18	618.46	49.99	11.56	-1.86769	4.74317e-225	9.43444e-225	yes	down
ENSG00000104731	2940	890.1	95.41	32.34	-1.6237	5.91566e-225	1.17535e-224	yes	down
ENSG00000103326	2473	646	44.53	17.05	-1.83658	7.1773e-225	1.42443e-224	yes	down
ENSG00000129493	5002.24	2110.71	54.87	24.4	-1.14477	1.26149e-224	2.5008e-224	yes	down
ENSG00000174353	1381.3	160.09	51.75	7.66	-3.009	1.44666e-224	2.86471e-224	yes	down
ENSG00000162819	1445.75	3494.92	26.62	69.25	1.37352	1.07415e-223	2.12469e-223	yes	up
ENSG00000145386	1928.87	387.98	43.39	10.48	-2.21363	1.34906e-223	2.6655e-223	yes	down
ENSG00000150712	2322	575	27.58	9.41	-1.91366	3.31123e-223	6.53518e-223	yes	down
ENSG00000270231	1308.54	135.8	11.66	1.6	-3.16833	3.32805e-223	6.56111e-223	yes	down
ENSG00000196352	2865	5472	109.81	255.45	1.03361	3.69829e-223	7.28297e-223	yes	up
ENSG00000148411	2240	535	18.88	5.84	-1.96581	3.76707e-223	7.41022e-223	yes	down
ENSG00000169855	2871	862	42.4	12.68	-1.63572	4.86736e-222	9.56406e-222	yes	down
ENSG00000106615	3732.87	6594.09	131.4	289.05	0.920964	5.10088e-222	1.00119e-221	no	up
ENSG00000141753	9953	14037	294.74	498.48	0.596106	1.14429e-221	2.24351e-221	no	up
ENSG00000158805	2368.67	602.31	45.06	15.32	-1.87542	1.28471e-221	2.51605e-221	yes	down
ENSG00000161526	1451	3489	66.3	187.02	1.36584	1.9457e-221	3.8064e-221	yes	up
ENSG00000243156	2570.69	706.92	37.27	14.85	-1.76246	6.60425e-221	1.29058e-220	yes	down
ENSG00000170458	1572	241	66.28	12.25	-2.60542	2.03787e-220	3.97797e-220	yes	down
ENSG00000143751	880	2598	13.43	47.67	1.6619	2.57605e-220	5.02301e-220	yes	up
ENSG00000175793	5770	2627	320.28	173.99	-1.03508	4.39012e-220	8.55089e-220	yes	down
ENSG00000140564	5232	8449	80.54	152.46	0.791493	8.60986e-220	1.67516e-219	no	up
ENSG00000107036	1390	171	13.36	2.21	-2.92294	9.66901e-220	1.87918e-219	yes	down
ENSG00000111206	2926.08	5525.93	62.44	141.56	1.01732	1.39187e-219	2.70217e-219	yes	up
ENSG00000173237	1015	6	64.75	0.46	-7.30223	1.59522e-219	3.09359e-219	yes	down
ENSG00000173599	4662	1921	105.05	62.64	-1.17902	1.7398e-219	3.37028e-219	yes	down
ENSG00000257093	1397.27	174.23	9.63	1.48	-2.90347	1.95154e-219	3.77637e-219	yes	down
ENSG00000150347	1177	96	10.41	1.11	-3.51586	3.28527e-219	6.35032e-219	yes	down
ENSG00000241839	490	1918.18	8.04	37.83	2.06896	6.03478e-219	1.16524e-218	yes	up
ENSG00000148926	2141	4458	119.71	264.41	1.15819	1.16344e-218	2.24402e-218	yes	up
ENSG00000276700	1148.99	3014.69	9.72	28.57	1.49172	1.65196e-218	3.18284e-218	yes	up
ENSG00000025772	3605	6399	115.18	245.07	0.927922	3.16196e-218	6.08556e-218	no	up
ENSG00000102871	2813.14	842.92	85.55	28.54	-1.63864	3.70301e-218	7.1192e-218	yes	down
ENSG00000115866	1972	4217	54.42	143.4	1.19663	6.97468e-218	1.33947e-217	yes	up
ENSG00000159840	5894	9235	228.19	485.84	0.74794	8.14611e-218	1.56275e-217	no	up
ENSG00000160949	2434.04	647	29.77	8.11	-1.81144	2.88712e-217	5.53271e-217	yes	down
ENSG00000136193	6704	3267	76.46	44.57	-0.936981	8.02583e-217	1.53637e-216	no	down
ENSG00000117625	1377	171	33.02	8.64	-2.90939	1.02357e-216	1.9573e-216	yes	down
ENSG00000170113	1978	427	27.43	7.96	-2.11166	3.13405e-216	5.98661e-216	yes	down
ENSG00000163960	2360	4741	13.84	42.99	1.10648	4.16927e-216	7.95553e-216	yes	up
ENSG00000121858	940	16	36.43	0.7	-5.77644	6.51413e-216	1.24165e-215	yes	down
ENSG00000215914	110	1103	2.8	32.06	3.42593	1.0235e-215	1.94881e-215	yes	up
ENSG00000204628	14172.2	8683.08	1646.23	1143.29	-0.606712	1.47027e-215	2.7965e-215	no	down
ENSG00000206560	1963	422	27.23	7.01	-2.11767	2.25551e-215	4.28546e-215	yes	down
ENSG00000198420	3063.45	989.96	41.45	13.97	-1.52964	5.11507e-215	9.70828e-215	yes	down
ENSG00000164111	10740	14852	427.28	693.88	0.567738	6.39403e-215	1.21228e-214	no	up
ENSG00000178921	1662	289	22.14	5.52	-2.4237	7.93161e-215	1.5022e-214	yes	down
ENSG00000107738	1900	395	42.57	9.85	-2.166	1.80187e-214	3.40901e-214	yes	down
ENSG00000101639	1648	285	20.71	4.13	-2.43161	7.83758e-214	1.48124e-213	yes	down
ENSG00000118503	1358	169	20.93	5.2	-2.90631	1.56014e-213	2.94542e-213	yes	down
ENSG00000104783	2660	776	105.98	31.15	-1.67722	2.75355e-213	5.19298e-213	yes	down
ENSG00000072310	5116.14	2240	139.13	60.82	-1.09148	7.43755e-213	1.40118e-212	yes	down
ENSG00000071127	9100	12941	194.63	326.41	0.608086	7.34332e-212	1.38197e-211	no	up
ENSG00000141380	4049	1577	117.87	57.63	-1.26031	7.7391e-212	1.45492e-211	yes	down
ENSG00000141098	1710.12	315.97	35.65	7.63	-2.33616	1.0039e-211	1.88529e-211	yes	down
ENSG00000100714	8849.64	4794	202.98	126.16	-0.784314	1.64205e-211	3.08048e-211	no	down
ENSG00000225246	590.15	2062.72	1.79	9.94	1.90547	2.02135e-211	3.78806e-211	yes	up
ENSG00000112146	1703	314	53.6	12.01	-2.33917	3.58983e-211	6.72037e-211	yes	down
ENSG00000163877	693	2236	10.36	52.79	1.79007	1.58759e-210	2.96894e-210	yes	up
ENSG00000134086	1604	273	31.87	8.5	-2.45463	1.97654e-210	3.69244e-210	yes	down
ENSG00000009954	5434	2459	55.33	30.31	-1.04387	2.96808e-210	5.53897e-210	yes	down
ENSG00000174695	1893	4053	31.51	63.11	1.19839	5.66355e-210	1.05581e-209	yes	up
ENSG00000105568	8796	12568	182.41	344.89	0.614911	6.43476e-210	1.19833e-209	no	up
ENSG00000083799	2614	5038	34	93.57	1.04667	7.42276e-210	1.38088e-209	yes	up
ENSG00000090686	2088	495	27.11	11.06	-1.97655	1.24015e-209	2.30468e-209	yes	down
ENSG00000116991	1492	231	15.81	2.6	-2.59121	4.59274e-208	8.52622e-208	yes	down
ENSG00000145901	2087	499	53.56	14.52	-1.96424	7.79311e-208	1.44525e-207	yes	down
ENSG00000085840	1428	206	28.1	4.9	-2.6932	1.17268e-207	2.17251e-207	yes	down
ENSG00000137337	884	2535	14.73	53.14	1.61994	2.26428e-207	4.19045e-207	yes	up
ENSG00000148343	1401	196	27.64	5.37	-2.73746	2.78776e-207	5.15389e-207	yes	down
ENSG00000145779	977	47	44.01	1.77	-4.27755	5.71712e-207	1.05586e-206	yes	down
ENSG00000224905	1013.59	58.85	9.92	1.3	-4.00621	6.46762e-207	1.19323e-206	yes	down
ENSG00000139746	1494	234	19.35	3.87	-2.57452	7.12099e-207	1.31241e-206	yes	down
ENSG00000119397	1346	176	16.16	2.29	-2.83496	1.71029e-206	3.14883e-206	yes	down
ENSG00000135624	5871	9091	222.34	409.85	0.730908	4.32374e-206	7.95228e-206	no	up
ENSG00000064419	2828	5293	40.21	90.61	1.00438	4.64298e-206	8.53062e-206	yes	up
ENSG00000115919	1852.38	392.27	68.97	19.2	-2.13939	5.80257e-206	1.06502e-205	yes	down
ENSG00000124151	6404	9726	50.92	102.73	0.702948	6.22075e-206	1.1406e-205	no	up
ENSG00000128274	1125	97	39.16	4.82	-3.43572	7.58322e-206	1.38898e-205	yes	down
ENSG00000138668	6548	3227	312.19	190.76	-0.920786	8.89133e-206	1.62691e-205	no	down
ENSG00000107223	4577	1932	728.27	335.43	-1.14423	1.49102e-205	2.72543e-205	yes	down
ENSG00000185896	6301	9599	147.25	276.62	0.707378	1.68043e-205	3.06851e-205	no	up
ENSG00000198890	919	30	22.3	0.87	-4.83696	4.43742e-205	8.09453e-205	yes	down
ENSG00000174306	1515	246	12.83	10.23	-2.52251	4.50345e-205	8.20659e-205	yes	down
ENSG00000163171	1344	178	20.41	4.51	-2.81651	7.80163e-205	1.42023e-204	yes	down
ENSG00000163257	1002	58	25.73	2.29	-4.01061	1.04014e-204	1.89157e-204	yes	down
ENSG00000105402	3485.74	6131.68	137.94	321.96	0.914893	2.4794e-204	4.50436e-204	no	up
ENSG00000136888	2987	5486	218	483.58	0.977133	4.40233e-204	7.98965e-204	no	up
ENSG00000101152	4933	2166	55.91	29.39	-1.08736	4.58567e-204	8.31391e-204	yes	down
ENSG00000100354	1656	309	7.27	1.89	-2.32195	1.28332e-203	2.32432e-203	yes	down
ENSG00000144476	1729	342	61.67	15.89	-2.23779	2.60391e-203	4.71135e-203	yes	down
ENSG00000164070	770.18	2327.52	9.47	42.69	1.6956	3.05577e-203	5.52331e-203	yes	up
ENSG00000144821	59	920	0.24	4.99	4.06292	4.75101e-203	8.57876e-203	yes	up
ENSG00000100105	1098	92	22.9	2.21	-3.47703	7.15589e-203	1.29081e-202	yes	down
ENSG00000100813	7761.22	11287.1	201.89	373.24	0.6404	9.66282e-203	1.74126e-202	no	up
ENSG00000185219	1030	70	6.71	0.37	-3.77907	1.81283e-202	3.26017e-202	yes	down
ENSG00000197256	7465.47	3880.28	208.21	145.53	-0.843997	1.81258e-202	3.26017e-202	no	down
ENSG00000059145	1158.29	2935.69	28.1	70.69	1.44178	2.12008e-202	3.80888e-202	yes	up
ENSG00000168016	1210	132	7.17	1.12	-3.09632	2.66617e-202	4.78514e-202	yes	down
ENSG00000143157	2113	526	21.53	6.44	-1.90608	3.07191e-202	5.5078e-202	yes	down
ENSG00000105821	1109.41	2859.87	35.88	116.14	1.46623	3.37232e-202	6.04034e-202	yes	up
ENSG00000108375	126	1090.54	1.81	21.72	3.21362	3.97629e-202	7.115e-202	yes	up
ENSG00000079691	1926	436	23.65	6.56	-2.04313	5.5887e-202	9.99015e-202	yes	down
ENSG00000179163	1851	401	59.65	15.49	-2.10656	7.23919e-202	1.29275e-201	yes	down
ENSG00000132694	2274	608	21.03	7.34	-1.80301	7.79806e-202	1.39116e-201	yes	down
ENSG00000077312	2439.57	4744.88	139.14	292.15	1.05982	8.39873e-202	1.49682e-201	yes	up
ENSG00000179115	2724	848	105.76	37.99	-1.58352	3.05943e-201	5.44707e-201	yes	down
ENSG00000108953	15290.9	19735.6	611.72	844.34	0.468208	3.16184e-201	5.62377e-201	no	up
ENSG00000187147	1613.05	295.64	61.51	15.1	-2.3478	5.36847e-201	9.53905e-201	yes	down
ENSG00000087448	1145	111	17.53	2.49	-3.26664	7.12058e-201	1.26397e-200	yes	down
ENSG00000139436	1381.35	199.72	22.7	3.86	-2.68995	1.09881e-200	1.94856e-200	yes	down
ENSG00000198830	14704	9236	1006.77	738.66	-0.570791	1.39905e-200	2.47852e-200	no	down
ENSG00000138604	1357	191	21.48	3.82	-2.7287	3.62019e-200	6.40705e-200	yes	down
ENSG00000166900	248	1359.69	6.17	39.75	2.55494	3.65705e-200	6.46585e-200	yes	up
ENSG00000070614	2970	989	26.07	12.51	-1.48635	5.9925e-200	1.05846e-199	yes	down
ENSG00000122140	1836.99	399	91.59	24.39	-2.10281	6.60513e-200	1.16551e-199	yes	down
ENSG00000126822	935.8	43	14.56	0.57	-4.34372	7.3557e-200	1.29667e-199	yes	down
ENSG00000132481	1049.54	79.99	33.94	3.39	-3.61372	8.35093e-200	1.47065e-199	yes	down
ENSG00000095787	2234.35	4453.11	48.33	120.05	1.09503	9.37606e-200	1.64956e-199	yes	up
ENSG00000184436	1090.36	94	56.72	5.12	-3.43592	1.39425e-199	2.45052e-199	yes	down
ENSG00000101236	1877.96	419.02	18.17	4.42	-2.064	1.46241e-199	2.56778e-199	yes	down
ENSG00000156232	946	2590.76	11.17	36.3	1.55354	1.56392e-199	2.74333e-199	yes	up
ENSG00000140983	4271	1768	183.01	81.51	-1.17238	1.807e-199	3.1666e-199	yes	down
ENSG00000117713	4047	1631	38.05	16.59	-1.21102	5.41237e-199	9.47536e-199	yes	down
ENSG00000275832	5782.72	2751.35	82	52.63	-0.971533	7.52539e-199	1.31617e-198	no	down
ENSG00000142627	6631	9920	121.25	185.09	0.681189	8.3259e-199	1.45475e-198	no	up
ENSG00000100281	1260	156	24.64	4.32	-2.91373	9.02688e-199	1.57568e-198	yes	down
ENSG00000101849	1914	438	22.29	6.47	-2.02751	9.04828e-199	1.57787e-198	yes	down
ENSG00000130254	2861.61	5280.53	73.16	205.84	0.983931	9.10996e-199	1.58707e-198	no	up
ENSG00000103365	2592	784.2	34.21	10.64	-1.6247	9.53305e-199	1.65916e-198	yes	down
ENSG00000107854	2713	5085	25.94	58.52	1.00643	1.04921e-198	1.82429e-198	yes	up
ENSG00000142937	12116	7294	1204.14	857.41	-0.632056	2.08792e-198	3.6268e-198	no	down
ENSG00000130816	8066.74	4334	134.26	78.79	-0.796211	5.26158e-198	9.13066e-198	no	down
ENSG00000206527	10236	5903	148.66	103.96	-0.694057	8.17264e-198	1.41685e-197	no	down
ENSG00000103150	1127.44	109.7	6.06	0.83	-3.26134	1.50376e-197	2.60447e-197	yes	down
ENSG00000180964	929	44	58.74	3.38	-4.30003	1.98549e-197	3.43547e-197	yes	down
ENSG00000076604	3035.63	1037	138.48	39.02	-1.4495	6.82766e-197	1.18024e-196	yes	down
ENSG00000141002	9551.81	5410.42	355.87	254.51	-0.719958	7.40626e-197	1.27901e-196	no	down
ENSG00000175105	497	1825	5.03	22.04	1.97665	1.55501e-196	2.6828e-196	yes	up
ENSG00000067225	106056	112416	3081.74	4038.55	0.184096	2.27519e-196	3.9215e-196	no	up
ENSG00000095261	2828	922	54.12	21.05	-1.51687	3.06157e-196	5.27182e-196	yes	down
ENSG00000167468	8248	4476	973.41	623.34	-0.781759	3.58064e-196	6.15966e-196	no	down
ENSG00000143390	2123	547	63.13	18.78	-1.85642	3.72844e-196	6.40773e-196	yes	down
ENSG00000163435	898.65	36	28.12	1.68	-4.54162	6.03961e-196	1.03697e-195	yes	down
ENSG00000104093	2007	490	21.57	7.99	-1.93411	6.14723e-196	1.05444e-195	yes	down
ENSG00000013573	2043.32	508.18	63.25	16.89	-1.90743	8.03677e-196	1.37722e-195	yes	down
ENSG00000158545	4921	7842	98.39	188.7	0.772345	9.0276e-196	1.54553e-195	no	up
ENSG00000092841	26770.3	18850.3	4136.12	3488.53	-0.405969	9.8806e-196	1.68994e-195	no	down
ENSG00000137812	1673	333.29	17.88	4.54	-2.22751	1.07057e-195	1.8293e-195	yes	down
ENSG00000185262	451	1737	34.96	98.04	2.04547	1.34286e-195	2.29237e-195	yes	up
ENSG00000173545	1732	3728	69.84	179.89	1.20604	3.08362e-195	5.25896e-195	yes	up
ENSG00000085872	1889.44	3946.95	31.11	76.18	1.16285	4.55971e-195	7.76894e-195	yes	up
ENSG00000082068	2285	634	51.96	21.35	-1.74956	1.30558e-194	2.22235e-194	yes	down
ENSG00000137177	1376	209	15.81	3.45	-2.61883	2.84251e-194	4.83388e-194	yes	down
ENSG00000162244	11574.9	6927.99	1576.97	1110.28	-0.64041	4.55351e-194	7.73618e-194	no	down
ENSG00000106723	3917	1573	71.96	31.56	-1.21616	6.04741e-194	1.02645e-193	yes	down
ENSG00000097046	1257	163	27.47	3.81	-2.84697	8.46977e-194	1.43623e-193	yes	down
ENSG00000188064	1282	172.96	20.12	3.22	-2.78981	1.35045e-193	2.2878e-193	yes	down
ENSG00000182670	5831.62	2814.74	83.59	44.38	-0.95082	1.63626e-193	2.76936e-193	no	down
ENSG00000082213	2203	595	48.36	18.13	-1.78843	1.91238e-193	3.23363e-193	yes	down
ENSG00000125450	2004	495	77.56	26.53	-1.91731	2.07199e-193	3.50018e-193	yes	down
ENSG00000198736	885	35	46.5	2.1	-4.56018	2.49026e-193	4.20278e-193	yes	down
ENSG00000140450	988	2621	14.68	46.85	1.50761	3.21561e-193	5.42181e-193	yes	up
ENSG00000185189	3245	1172.24	63.82	26.39	-1.36888	4.5377e-193	7.64375e-193	yes	down
ENSG00000100226	2403.41	4630.97	42.91	79.21	1.04631	5.84122e-193	9.83022e-193	yes	up
ENSG00000196504	4626	7454	74.8	141.84	0.788325	8.01521e-193	1.34761e-192	no	up
ENSG00000134294	11138	6613	179.47	108.6	-0.652038	8.08165e-193	1.3575e-192	no	down
ENSG00000124104	1354.12	203.02	59.19	11.93	-2.63759	1.08158e-192	1.81506e-192	yes	down
ENSG00000119986	1599	307	78.17	17.93	-2.28078	1.53467e-192	2.57298e-192	yes	down
ENSG00000100353	4254	6993	220.52	410.98	0.817167	1.91843e-192	3.21336e-192	no	up
ENSG00000126804	1581.37	299.43	29.41	6.54	-2.30081	1.94845e-192	3.26059e-192	yes	down
ENSG00000124160	1570	295	32.55	6.82	-2.3119	3.66277e-192	6.12363e-192	yes	down
ENSG00000119537	953	2559	23.01	136.05	1.52511	6.70952e-192	1.12068e-191	yes	up
ENSG00000106299	1716	3683	23.26	60.05	1.20191	7.15065e-192	1.19325e-191	yes	up
ENSG00000198060	1519	3403	33.69	91.9	1.26376	7.64438e-192	1.27444e-191	yes	up
ENSG00000184840	3797	6418	183.23	371.96	0.857339	9.97201e-192	1.66094e-191	no	up
ENSG00000116604	1771	3759	22.09	54.95	1.18586	1.05621e-191	1.75758e-191	yes	up
ENSG00000205413	866	31	7.41	0.32	-4.70395	1.56599e-191	2.60346e-191	yes	down
ENSG00000110237	3014.44	1044.87	43.28	16.31	-1.42849	2.44967e-191	4.06878e-191	yes	down
ENSG00000125124	3331.27	1230.04	112.27	44.97	-1.33729	2.89962e-191	4.81164e-191	yes	down
ENSG00000280987	518.94	1836.88	7.13	32.26	1.92369	6.90632e-191	1.14497e-190	yes	up
ENSG00000180263	1378	216	10.35	3.63	-2.5734	6.99883e-191	1.15923e-190	yes	down
ENSG00000165891	1279	177	16.52	3.33	-2.75312	1.54906e-190	2.56335e-190	yes	down
ENSG00000183049	1997.94	499.58	17.21	4.72	-1.89965	1.74847e-190	2.89065e-190	yes	down
ENSG00000135521	1197	146	43.61	6.37	-2.93531	2.66262e-190	4.39788e-190	yes	down
ENSG00000173334	1057	96	17.5	2.02	-3.36072	4.35951e-190	7.194e-190	yes	down
ENSG00000167513	3304.17	1219.03	72.39	31.51	-1.33848	5.56574e-190	9.176e-190	yes	down
ENSG00000152894	3796	1516	46.37	26.19	-1.22414	6.04472e-190	9.95646e-190	yes	down
ENSG00000137942	2350	682	29.92	11.58	-1.68474	7.37452e-190	1.21356e-189	yes	down
ENSG00000071794	3225.01	1173	45.71	18.88	-1.35903	8.23182e-190	1.35339e-189	yes	down
ENSG00000139645	6429	3244	43.87	27.14	-0.886745	9.19045e-190	1.5096e-189	no	down
ENSG00000196411	1115	117	17.8	2.78	-3.15239	1.21295e-189	1.99052e-189	yes	down
ENSG00000172239	5103	2354	155.68	90.96	-1.01616	4.05265e-189	6.64455e-189	yes	down
ENSG00000183569	215.92	1244.77	4.99	37.59	2.62739	4.2731e-189	6.99955e-189	yes	up
ENSG00000253729	31190	22565	244.89	236.01	-0.366922	6.22673e-189	1.01903e-188	no	down
ENSG00000140650	1660.42	343.49	50.68	21.82	-2.17313	1.87786e-188	3.07038e-188	yes	down
ENSG00000176974	3699	1463	105.5	52.29	-1.23813	1.90062e-188	3.10476e-188	yes	down
ENSG00000167113	2864.82	969.87	90.09	47.87	-1.46251	2.11599e-188	3.4534e-188	yes	down
ENSG00000131459	3376	1268	69.38	31.23	-1.31268	2.13987e-188	3.48918e-188	yes	down
ENSG00000158985	1462	256	26.73	5.76	-2.41365	2.52113e-188	4.10709e-188	yes	down
ENSG00000134874	1942.64	478	26.15	10.82	-1.92286	2.86842e-188	4.66858e-188	yes	down
ENSG00000170315	20018.1	13529.4	1703.4	1353.21	-0.465126	2.93848e-188	4.77824e-188	no	down
ENSG00000158773	1390	226	63.23	12.29	-2.52062	3.63043e-188	5.89804e-188	yes	down
ENSG00000164587	7851	4251	502.52	391.34	-0.784999	3.74258e-188	6.0747e-188	no	down
ENSG00000103037	1297.77	188.58	65.99	11.72	-2.68271	3.93417e-188	6.37987e-188	yes	down
ENSG00000258017	931.7	3.13	89.67	0.57	-8.11748	5.03219e-188	8.15306e-188	yes	down
ENSG00000146670	1747	3699	46.56	120.28	1.18233	8.56562e-188	1.38652e-187	yes	up
ENSG00000132549	2032	524	12.54	4.23	-1.85519	1.14212e-187	1.84709e-187	yes	down
ENSG00000233765	94.63	955.25	0.62	11.23	3.43558	1.59922e-187	2.58397e-187	yes	up
ENSG00000148218	1918	469	42.6	12.23	-1.93187	4.69385e-187	7.57733e-187	yes	down
ENSG00000163320	2015	4062	35.8	78.14	1.11149	8.57239e-187	1.3826e-186	yes	up
ENSG00000159461	5876	8897	141.52	243.5	0.69856	1.64111e-186	2.64447e-186	no	up
ENSG00000135829	10635	6295	188.77	143.09	-0.656467	2.11638e-186	3.40723e-186	no	down
ENSG00000112877	2227	628	22.28	5.89	-1.72619	3.14567e-186	5.05976e-186	yes	down
ENSG00000143164	3293	1227.32	65.16	31.47	-1.32382	3.37361e-186	5.42149e-186	yes	down
ENSG00000139178	1650.5	344.27	45.62	15.45	-2.16122	4.52068e-186	7.25833e-186	yes	down
ENSG00000164402	2580	818.45	48.48	16.19	-1.55633	5.13842e-186	8.24275e-186	yes	down
ENSG00000135924	1008	2610	27.27	81.32	1.47263	6.6763e-186	1.07001e-185	yes	up
ENSG00000160613	3845.97	1565.45	63.53	29.18	-1.19669	1.01741e-185	1.62913e-185	yes	down
ENSG00000172830	2626	845	74.46	27.2	-1.53577	1.10007e-185	1.75992e-185	yes	down
ENSG00000023734	3526	6023	129.47	263.45	0.872525	1.90709e-185	3.04826e-185	no	up
ENSG00000170365	437	1663	16.19	70.31	2.02816	2.51112e-185	4.01013e-185	yes	up
ENSG00000101040	904	52	11.07	0.74	-4.01966	3.8385e-185	6.12441e-185	yes	down
ENSG00000132952	208	1211	3.31	22.79	2.64162	4.29629e-185	6.84869e-185	yes	up
ENSG00000138018	879.99	2406	6.32	23.45	1.55115	4.87525e-185	7.76467e-185	yes	up
ENSG00000142864	11555	6996.01	278.84	215.2	-0.623838	5.37839e-185	8.55836e-185	no	down
ENSG00000153406	1631	338	105.21	27.89	-2.17059	6.97706e-185	1.10923e-184	yes	down
ENSG00000205918	124.37	1018.29	3.38	33.09	3.13351	1.12166e-184	1.78166e-184	yes	up
ENSG00000125630	972	75	14.36	1.26	-3.59592	1.61201e-184	2.55826e-184	yes	down
ENSG00000161654	1093.23	116.92	33.7	5.64	-3.12493	1.6145e-184	2.55993e-184	yes	down
ENSG00000189423	1438.16	253.45	12.49	4.56	-2.40438	1.81519e-184	2.87559e-184	yes	down
ENSG00000169851	1022	92	11.58	1.4	-3.37354	1.93924e-184	3.06937e-184	yes	down
ENSG00000275835	921	59	19.82	1.22	-3.86434	5.5389e-184	8.75902e-184	yes	down
ENSG00000142089	11136.1	6691.54	1260.41	895.26	-0.634756	6.75689e-184	1.06756e-183	no	down
ENSG00000131435	1293	195	56.54	14.91	-2.6291	1.88219e-183	2.97116e-183	yes	down
ENSG00000078403	1040	100	31.84	6.14	-3.27844	3.30009e-183	5.20479e-183	yes	down
ENSG00000225697	1799	421	66.18	18.82	-1.99523	3.99233e-183	6.29101e-183	yes	down
ENSG00000148773	12577	7789	71.9	57.54	-0.591203	6.27084e-183	9.87268e-183	no	down
ENSG00000141076	5084.32	2376	155.38	94.18	-0.997445	8.39915e-183	1.32118e-182	no	down
ENSG00000149257	9153	12649	281.1	460.75	0.566782	8.72116e-183	1.37062e-182	no	up
ENSG00000185304	700.65	2105.1	9.76	41.19	1.6872	9.6105e-183	1.50906e-182	yes	up
ENSG00000111907	3595.28	1426	293.1	136.84	-1.23405	2.76429e-182	4.33672e-182	yes	down
ENSG00000153561	1057.86	2663.96	9.87	30.03	1.4325	4.20615e-182	6.59296e-182	yes	up
ENSG00000111530	5763	2836	71.54	43.59	-0.922887	4.8422e-182	7.58327e-182	no	down
ENSG00000054654	7275.48	3886.05	64.85	40.12	-0.804663	5.02132e-182	7.85689e-182	no	down
ENSG00000132300	1675	365	150.04	39.87	-2.09812	5.98607e-182	9.35821e-182	yes	down
ENSG00000162520	943.72	69.41	28.69	3.05	-3.66507	9.88807e-182	1.54448e-181	yes	down
ENSG00000268388	809	25	22.09	0.71	-4.91606	1.10795e-181	1.72906e-181	yes	down
ENSG00000163161	2229	643	59.81	19.67	-1.69343	1.72355e-181	2.68741e-181	yes	down
ENSG00000170779	2287	674	58.22	19.67	-1.66256	2.03868e-181	3.17599e-181	yes	down
ENSG00000167880	2365	716	22.13	9.27	-1.62373	2.27496e-181	3.54098e-181	yes	down
ENSG00000129003	2280	671	13.37	4.52	-1.66457	3.54856e-181	5.51853e-181	yes	down
ENSG00000137076	8171	11508.9	79.34	142.32	0.594242	4.27196e-181	6.63774e-181	no	up
ENSG00000115966	1502	3308.89	32.14	83.66	1.23954	4.37568e-181	6.79297e-181	yes	up
ENSG00000154582	699	2092.98	57.12	264.82	1.68227	5.83037e-181	9.04341e-181	yes	up
ENSG00000162664	1568	3401	26.91	82.52	1.21711	7.43632e-181	1.15243e-180	yes	up
ENSG00000183309	1512.06	293.32	20.31	5.45	-2.26589	9.2622e-181	1.43415e-180	yes	down
ENSG00000096433	7205.6	3849.14	45.95	29.43	-0.804507	3.08311e-180	4.76972e-180	no	down
ENSG00000184207	1585	328	41.24	12.45	-2.17264	6.16869e-180	9.53498e-180	yes	down
ENSG00000187764	354	1483.05	7.35	40.68	2.16682	7.45821e-180	1.15182e-179	yes	up
ENSG00000176853	2602	4792.99	36.25	82.86	0.98138	7.75717e-180	1.19695e-179	no	up
ENSG00000078399	882.17	52	50.12	2.07	-3.9844	9.28057e-180	1.43078e-179	yes	down
ENSG00000178184	132.01	1017	2.19	9.15	3.04568	1.08837e-179	1.67648e-179	yes	up
ENSG00000173581	659.78	2021.44	16.53	74.07	1.7154	1.14605e-179	1.76381e-179	yes	up
ENSG00000006459	240	1256	1.71	64.42	2.48781	1.18974e-179	1.82947e-179	yes	up
ENSG00000134215	1059	112	29.38	3.25	-3.14106	1.2221e-179	1.87761e-179	yes	down
ENSG00000160216	3560	1416	43.03	22.47	-1.22998	1.36789e-179	2.09978e-179	yes	down
ENSG00000160299	6034	3037	55.2	32.64	-0.890393	1.86078e-179	2.85394e-179	no	down
ENSG00000189306	1524.07	3328.73	26.38	69.38	1.22712	2.49457e-179	3.82271e-179	yes	up
ENSG00000099812	2304	690	50.34	18.14	-1.6394	3.62781e-179	5.55453e-179	yes	down
ENSG00000082805	4046	1721	31.79	13.72	-1.13317	3.66827e-179	5.61165e-179	yes	down
ENSG00000126461	3118	5451	44.38	100.8	0.905975	6.20453e-179	9.48345e-179	no	up
ENSG00000183337	2127	597	26.4	8.29	-1.73294	6.35664e-179	9.70763e-179	yes	down
ENSG00000196712	3981	1681.04	25.54	15.07	-1.1437	6.36298e-179	9.70898e-179	yes	down
ENSG00000150961	924	2439	14.82	47.2	1.5004	1.09039e-178	1.66125e-178	yes	up
ENSG00000070018	1592	334	20.78	5.28	-2.15285	1.0906e-178	1.66125e-178	yes	down
ENSG00000110514	1948	506	34.45	11.94	-1.84471	1.24318e-178	1.89205e-178	yes	down
ENSG00000102977	3108	1148	162.79	76.67	-1.33679	1.76053e-178	2.67714e-178	yes	down
ENSG00000165288	1180	159	10.09	0.99	-2.79161	1.78408e-178	2.71064e-178	yes	down
ENSG00000183054	658.91	2013.73	6.82	34.06	1.71179	1.81917e-178	2.76161e-178	yes	up
ENSG00000239305	805.11	2250.09	16.43	48.62	1.5828	2.72534e-178	4.1337e-178	yes	up
ENSG00000162607	3011	1092	45.92	20.48	-1.36319	3.56818e-178	5.40749e-178	yes	down
ENSG00000188177	233	1235	2.79	6.81	2.50618	3.80513e-178	5.76168e-178	yes	up
ENSG00000237973	856.5	46.19	38.92	2.51	-4.11273	6.95598e-178	1.05237e-177	yes	down
ENSG00000151458	959	80	6.32	0.63	-3.48338	1.04687e-177	1.58246e-177	yes	down
ENSG00000149596	1628	353	19.38	4.95	-2.10529	1.1613e-177	1.75396e-177	yes	down
ENSG00000148297	1557.69	320.6	30.9	6.56	-2.18049	1.17037e-177	1.76615e-177	yes	down
ENSG00000131471	11	722.89	0.34	16.14	6.13828	1.18729e-177	1.79017e-177	yes	up
ENSG00000132405	1184.45	162.3	17.18	2.68	-2.76741	1.50526e-177	2.26769e-177	yes	down
ENSG00000160293	4122	1779	51.6	26.7	-1.1122	3.85303e-177	5.79971e-177	yes	down
ENSG00000076351	2490.46	799.03	24.82	14.26	-1.54002	6.49388e-177	9.76657e-177	yes	down
ENSG00000083857	3229	1227	25.58	11.72	-1.29588	9.20737e-177	1.38359e-176	yes	down
ENSG00000173451	70.29	850.1	2.62	18.88	3.69632	1.32908e-176	1.99552e-176	yes	up
ENSG00000125901	998	95	68.54	7.77	-3.29297	1.48174e-176	2.22286e-176	yes	down
ENSG00000008710	6975.39	3714.4	161.07	98.1	-0.80907	3.13745e-176	4.70274e-176	no	down
ENSG00000124496	842	44	6.81	0.41	-4.15817	5.48371e-176	8.21266e-176	yes	down
ENSG00000080200	1546.65	319.4	10.18	3.51	-2.17564	6.24816e-176	9.34967e-176	yes	down
ENSG00000129071	1443	273	56.37	12.66	-2.30202	6.87167e-176	1.02741e-175	yes	down
ENSG00000141013	1851.23	465.38	68.4	15.61	-1.89193	1.07428e-175	1.60484e-175	yes	down
ENSG00000116237	4394	1962	71.49	32.98	-1.06313	1.62465e-175	2.425e-175	yes	down
ENSG00000138834	4677	2148	98.24	48.1	-1.02251	2.85152e-175	4.25269e-175	yes	down
ENSG00000121104	158	1058.87	4.3	53.98	2.8446	4.93484e-175	7.35357e-175	yes	up
ENSG00000115840	918	70	21.37	6.46	-3.61299	5.36961e-175	7.99474e-175	yes	down
ENSG00000188130	2320.51	712.39	48.61	16.69	-1.60363	7.24901e-175	1.0784e-174	yes	down
ENSG00000175216	7641	4198	78.62	52.68	-0.763984	7.32095e-175	1.08819e-174	no	down
ENSG00000095002	1723	405	32.15	9.26	-1.98885	9.45653e-175	1.40445e-174	yes	down
ENSG00000188153	6385	3314	80.57	45.87	-0.846038	3.62183e-174	5.37454e-174	no	down
ENSG00000180357	3052	1132	20.19	8.95	-1.33081	4.12542e-174	6.11674e-174	yes	down
ENSG00000169045	15919	10469	704.93	749.39	-0.504551	6.61331e-174	9.79736e-174	no	down
ENSG00000185920	948	82	10.42	0.8	-3.43112	1.33892e-173	1.98192e-173	yes	down
ENSG00000016864	1286.26	210.49	77.01	12.38	-2.51128	1.47413e-173	2.18025e-173	yes	down
ENSG00000143442	1641	369	20.14	4.44	-2.05281	1.94142e-173	2.86899e-173	yes	down
ENSG00000188493	894.43	2363.12	18.82	55.78	1.50173	2.03687e-173	3.00754e-173	yes	up
ENSG00000128335	955	85	28.59	3.52	-3.38989	3.63409e-173	5.36147e-173	yes	down
ENSG00000205937	6745	9770.02	327.62	477.35	0.634618	5.57606e-173	8.21972e-173	no	up
ENSG00000123104	2634	894	14.55	5.56	-1.45883	9.59173e-173	1.41276e-172	yes	down
ENSG00000128309	1167.44	163.97	52.3	9.82	-2.73177	1.07017e-172	1.57494e-172	yes	down
ENSG00000182810	1294.11	216	38.96	7.8	-2.48278	2.19801e-172	3.23208e-172	yes	down
ENSG00000103415	1248	197	64.81	10.09	-2.56328	2.53808e-172	3.72907e-172	yes	down
ENSG00000087266	2092	598	42.92	14.7	-1.70659	2.60604e-172	3.82576e-172	yes	down
ENSG00000100888	3607	1478	50.86	24.09	-1.18708	4.0875e-172	5.99566e-172	yes	down
ENSG00000198954	1402	263	35.82	8.54	-2.31428	4.97622e-172	7.29327e-172	yes	down
ENSG00000164252	1130	151	15.55	3.27	-2.80363	9.49719e-172	1.39079e-171	yes	down
ENSG00000176624	683	2017	11.98	42.48	1.66233	1.43218e-171	2.09558e-171	yes	up
ENSG00000164404	11	696.88	0.26	21.76	6.08541	1.65725e-171	2.42293e-171	yes	up
ENSG00000177732	867	58	11.22	0.9	-3.80183	1.88456e-171	2.753e-171	yes	down
ENSG00000120899	1493	305	25.02	5.4	-2.19126	2.12587e-171	3.10297e-171	yes	down
ENSG00000151914	2975	1098	37.35	13.33	-1.33794	3.7412e-171	5.45626e-171	yes	down
ENSG00000205726	2989	1106.43	47.29	29.6	-1.33368	4.05594e-171	5.91046e-171	yes	down
ENSG00000141543	3695	6107	228.39	513.56	0.824965	4.75978e-171	6.93045e-171	no	up
ENSG00000164543	1043	2576	27.41	93.73	1.40447	4.8066e-171	6.9929e-171	yes	up
ENSG00000129422	1458	290	21.98	5.18	-2.22979	5.03446e-171	7.31844e-171	yes	down
ENSG00000114346	3094	1170.4	50.93	25.13	-1.3024	9.16219e-171	1.33079e-170	yes	down
ENSG00000239900	2410.26	775.16	103.22	38.01	-1.53655	1.00556e-170	1.45937e-170	yes	down
ENSG00000136827	2462	804	81.14	31.32	-1.51449	1.0192e-170	1.47797e-170	yes	down
ENSG00000033100	2953	5172	48.62	102.05	0.908616	1.05177e-170	1.52396e-170	no	up
ENSG00000102878	1444.06	285.14	117.63	20.16	-2.24031	2.23503e-170	3.23579e-170	yes	down
ENSG00000198363	11705	7251.52	210.75	157.16	-0.590694	4.0005e-170	5.78708e-170	no	down
ENSG00000186603	746	19	31.68	0.97	-5.19503	5.5816e-170	8.06773e-170	yes	down
ENSG00000259583	1253.07	203.5	22.99	4.5	-2.52229	5.85999e-170	8.46326e-170	yes	down
ENSG00000141503	5250.96	2560.92	86.29	41.45	-0.935844	6.2758e-170	9.05645e-170	no	down
ENSG00000115594	1049	124	14.09	2.13	-2.98053	1.67023e-169	2.40832e-169	yes	down
ENSG00000015568	476.34	1656.28	8.3	31.33	1.89796	2.78504e-169	4.01253e-169	yes	up
ENSG00000140853	2110	617	36.64	11.95	-1.67383	3.93433e-169	5.66378e-169	yes	down
ENSG00000121749	1267.31	2894.59	33.96	103.63	1.29166	4.51356e-169	6.49239e-169	yes	up
ENSG00000179604	1388	263	27.95	6.4	-2.2998	4.54254e-169	6.52879e-169	yes	down
ENSG00000010322	4770	2244	56.12	33.49	-0.987841	6.23013e-169	8.94707e-169	no	down
ENSG00000242110	947.12	89	30.62	3.84	-3.31159	1.84528e-168	2.64787e-168	yes	down
ENSG00000157227	9149	12462	162.34	246.01	0.545925	1.89665e-168	2.71939e-168	no	up
ENSG00000262814	1896.61	508.98	148.31	47.28	-1.79767	5.31679e-168	7.61701e-168	yes	down
ENSG00000125166	9089	5308	243.98	165.91	-0.675878	6.26271e-168	8.96497e-168	no	down
ENSG00000184697	5	720	0.17	33.15	7.27	8.66159e-168	1.2389e-167	yes	up
ENSG00000185201	4480.24	2060.2	654.44	346.95	-1.02072	1.67159e-167	2.38902e-167	yes	down
ENSG00000162378	1500.02	317	12.78	3.72	-2.14235	1.82442e-167	2.60536e-167	yes	down
ENSG00000118985	4444	2037	59.08	32.2	-1.02534	2.17413e-167	3.10227e-167	yes	down
ENSG00000038382	6627	3530	74.56	51.02	-0.808613	2.28223e-167	3.25391e-167	no	down
ENSG00000130305	1029.05	120.05	42.54	5.87	-2.99953	2.50175e-167	3.56404e-167	yes	down
ENSG00000180817	3727	1576	217.1	115.52	-1.14167	3.635e-167	5.17436e-167	yes	down
ENSG00000143398	4478	7027	76.89	146.47	0.75013	4.64997e-167	6.61386e-167	no	up
ENSG00000143367	1473	3175	30.29	78.53	1.20807	5.09065e-167	7.23489e-167	yes	up
ENSG00000139697	1836	3677	14.49	37.05	1.10204	5.43995e-167	7.72515e-167	yes	up
ENSG00000269713	1819.52	473.39	27.5	8.68	-1.84238	1.05739e-166	1.50038e-166	yes	down
ENSG00000105723	1964	3846.99	59.55	138.88	1.07001	1.50671e-166	2.13625e-166	yes	up
ENSG00000115825	1394.98	272	19.92	6.31	-2.25849	2.87653e-166	4.07516e-166	yes	down
ENSG00000184445	3601	1501	58.24	37.7	-1.1624	3.03381e-166	4.29456e-166	yes	down
ENSG00000103091	1736	433.09	41.28	15.66	-1.90295	3.67133e-166	5.19289e-166	yes	down
ENSG00000186166	1580.98	3320.12	62.23	128.24	1.17049	4.06415e-166	5.74396e-166	yes	up
ENSG00000153989	1468.82	305.91	19.02	4.75	-2.1634	5.05474e-166	7.13831e-166	yes	down
ENSG00000138166	122	939	3.04	28.07	3.04432	5.36816e-166	7.57492e-166	yes	up
ENSG00000139116	721	2048	11.2	32.65	1.60622	6.57957e-166	9.27697e-166	yes	up
ENSG00000167264	1227.89	201	44.84	9.48	-2.51084	9.64588e-166	1.35896e-165	yes	down
ENSG00000185950	152.9	1009.57	1.09	8.68	2.82316	1.03007e-165	1.45006e-165	yes	up
ENSG00000127616	5123	2502	78.7	48.9	-0.933832	3.0133e-165	4.2386e-165	no	down
ENSG00000004142	5383	8089	166.38	299.94	0.687626	3.65263e-165	5.13384e-165	no	up
ENSG00000106404	343.93	1396.71	7.73	29.81	2.12192	3.74325e-165	5.25706e-165	yes	up
ENSG00000117632	7690.02	4309.03	455.29	297.15	-0.735549	7.31255e-165	1.02617e-164	no	down
ENSG00000136261	1351	2987	50.37	129.19	1.24474	9.81391e-165	1.37611e-164	yes	up
ENSG00000197153	43.64	732.97	0.52	7.65	4.17011	1.33904e-164	1.87613e-164	yes	up
ENSG00000133119	1139	167	30.72	5.36	-2.66977	1.59952e-164	2.23933e-164	yes	down
ENSG00000071894	5359	2667	162.37	88.57	-0.906671	1.67483e-164	2.34292e-164	no	down
ENSG00000001629	2117	635	23.2	8.78	-1.63712	1.81707e-164	2.5399e-164	yes	down
ENSG00000061676	8981	12218.1	142.35	222.83	0.544145	3.15159e-164	4.40185e-164	no	up
ENSG00000163125	2215	689	22.22	8.39	-1.58466	3.43278e-164	4.79083e-164	yes	down
ENSG00000271254	1356.98	259.68	24.33	5.32	-2.28552	4.08788e-164	5.70064e-164	yes	down
ENSG00000175376	684	1978.08	32.27	105.3	1.63211	5.36627e-164	7.47752e-164	yes	up
ENSG00000128829	2778	1010	42.79	18.88	-1.35962	6.81622e-164	9.49051e-164	yes	down
ENSG00000166979	768	36	32.8	14.84	-4.31496	7.43814e-164	1.03484e-163	yes	down
ENSG00000280071	3122.2	1216.45	128.81	52.85	-1.25981	1.01668e-163	1.41336e-163	yes	down
ENSG00000182481	4631	2181	138.73	78.77	-0.986259	1.22563e-163	1.7025e-163	no	down
ENSG00000196839	1125	163	56.28	10.21	-2.68691	1.25051e-163	1.73571e-163	yes	down
ENSG00000137876	1105	2622	36.28	112.97	1.3467	2.11568e-163	2.93428e-163	yes	up
ENSG00000204682	725	22	11.61	0.42	-4.94233	2.78767e-163	3.86328e-163	yes	down
ENSG00000114646	76.01	814	1.95	8.85	3.52084	3.30944e-163	4.58281e-163	yes	up
ENSG00000088812	2280	728	18.81	12.14	-1.54695	3.41487e-163	4.72513e-163	yes	down
ENSG00000196535	3335.78	1350.02	34.01	18.94	-1.20497	4.22471e-163	5.84117e-163	yes	down
ENSG00000111676	6061	8862.19	86.13	148.24	0.648183	4.94801e-163	6.83592e-163	no	up
ENSG00000131480	22	672	0.54	19.33	5.03296	5.0727e-163	7.00276e-163	yes	up
ENSG00000163719	923	2347	23.49	44.67	1.44649	5.20112e-163	7.17447e-163	yes	up
ENSG00000137710	7303	4046	143.08	79.55	-0.751918	1.03776e-162	1.43039e-162	no	down
ENSG00000170265	1530	342	25.67	6.81	-2.06139	1.05024e-162	1.44648e-162	yes	down
ENSG00000141298	1247	215	39.25	14.72	-2.43598	1.2275e-162	1.6893e-162	yes	down
ENSG00000004487	8127	4647	168.19	115.59	-0.706348	2.43416e-162	3.34734e-162	no	down
ENSG00000164151	4543	2131	32.14	17.63	-0.99204	4.13772e-162	5.68562e-162	no	down
ENSG00000168813	909	85	8.13	0.92	-3.31867	4.71698e-162	6.47657e-162	yes	down
ENSG00000206053	5357.51	2681.44	98.12	80.39	-0.898479	5.45819e-162	7.48851e-162	no	down
ENSG00000146858	1040.98	133.38	14.91	3.63	-2.86425	8.03701e-162	1.10181e-161	yes	down
ENSG00000198585	1071	145	13.24	2.02	-2.78476	9.0111e-162	1.2344e-161	yes	down
ENSG00000100504	4678	2223	125.08	65.07	-0.973309	9.80554e-162	1.3422e-161	no	down
ENSG00000077721	3706	6034	143.05	291.09	0.803327	1.41432e-161	1.93446e-161	no	up
ENSG00000141367	10837	14251	95.28	140.25	0.495173	2.16755e-161	2.96242e-161	no	up
ENSG00000075643	2389	795	25.21	9.89	-1.4873	2.1787e-161	2.97539e-161	yes	down
ENSG00000184863	2285	4234	25.31	55.46	0.989902	2.28436e-161	3.11729e-161	no	up
ENSG00000257704	192.93	1079.27	11.45	76.36	2.58398	2.7255e-161	3.71643e-161	yes	up
ENSG00000103550	715.69	22	15.12	0.74	-4.92368	4.90197e-161	6.67912e-161	yes	down
ENSG00000143344	710	20	8.87	0.3	-5.04967	7.36881e-161	1.00326e-160	yes	down
ENSG00000103319	805.47	52	7.03	0.95	-3.85317	7.40439e-161	1.00734e-160	yes	down
ENSG00000197323	1577	369	14.92	5.57	-1.99541	8.45319e-161	1.14914e-160	yes	down
ENSG00000197182	805.18	52.04	23.48	3.3	-3.85154	9.36038e-161	1.2715e-160	yes	down
ENSG00000113739	474	1610	10.88	37.96	1.86418	1.01463e-160	1.37721e-160	yes	up
ENSG00000107554	823	58	8.71	0.88	-3.72669	1.2287e-160	1.66651e-160	yes	down
ENSG00000092098	1214.71	205.31	52.59	12.03	-2.46466	1.33652e-160	1.81137e-160	yes	down
ENSG00000105974	10106	6133	249.7	186.45	-0.620472	1.64514e-160	2.22794e-160	no	down
ENSG00000005007	5379	8034	62.77	116.63	0.678856	1.98454e-160	2.68553e-160	no	up
ENSG00000119403	2613	927	105.52	40.41	-1.39499	2.37366e-160	3.20966e-160	yes	down
ENSG00000177733	4904	7470	159.88	323.87	0.707224	2.62075e-160	3.54108e-160	no	up
ENSG00000119596	2894	1093	34.24	16.42	-1.3047	2.73719e-160	3.69562e-160	yes	down
ENSG00000205220	1667.04	414.41	118.77	35.6	-1.90808	3.27372e-160	4.41667e-160	yes	down
ENSG00000141738	878	77	39.32	3.71	-3.41122	3.50773e-160	4.7288e-160	yes	down
ENSG00000169925	2200.67	694.33	24.45	14.46	-1.56417	4.01787e-160	5.41243e-160	yes	down
ENSG00000139719	1557	361.31	23.53	9.95	-2.00738	5.1413e-160	6.92055e-160	yes	down
ENSG00000115963	1790	3563	43.97	101.66	1.09321	8.29987e-160	1.11638e-159	yes	up
ENSG00000105298	1658.09	3382.78	33.3	75.31	1.12876	9.00261e-160	1.20999e-159	yes	up
ENSG00000086544	334	1353	6.07	29.58	2.11832	1.04085e-159	1.39789e-159	yes	up
ENSG00000020256	800	52	19.74	1.76	-3.84334	1.64551e-159	2.2083e-159	yes	down
ENSG00000197312	1683.75	424.88	10.98	2.84	-1.88648	2.25638e-159	3.02583e-159	yes	down
ENSG00000225151	1107.66	163.69	29.88	4.85	-2.6584	2.50755e-159	3.36011e-159	yes	down
ENSG00000133030	14690	9678	227.28	228.73	-0.501981	3.68287e-159	4.93134e-159	no	down
ENSG00000157978	1115	167	24.52	4.19	-2.63905	4.01567e-159	5.37291e-159	yes	down
ENSG00000134574	1421	299.58	60.94	16.01	-2.14582	4.5386e-159	6.06803e-159	yes	down
ENSG00000037749	1114	2607	24.49	59.3	1.32672	7.79552e-159	1.04147e-158	yes	up
ENSG00000173402	8692	5092	105.11	79.14	-0.671381	8.02714e-159	1.07161e-158	no	down
ENSG00000181904	2444.14	835.7	37.8	14.91	-1.44819	1.02756e-158	1.37075e-158	yes	down
ENSG00000166794	8297.14	11374.5	606.19	985.67	0.555194	1.2834e-158	1.71075e-158	no	up
ENSG00000100852	2599	4619.03	27.69	58.62	0.929708	1.35368e-158	1.80309e-158	no	up
ENSG00000107672	921.39	95	51.13	6.39	-3.17774	3.40263e-158	4.52888e-158	yes	down
ENSG00000137124	766	43	16	1.05	-4.05486	5.23734e-158	6.96565e-158	yes	down
ENSG00000176155	1064.42	149.18	57.1	21.25	-2.73487	7.99881e-158	1.06305e-157	yes	down
ENSG00000036257	1465.64	3102	34.08	89.59	1.18174	1.08645e-157	1.44282e-157	yes	up
ENSG00000213853	2245.06	727	25.94	10.01	-1.52665	1.1189e-157	1.48481e-157	yes	down
ENSG00000176142	958	2368	22.22	66.57	1.40565	1.35355e-157	1.79487e-157	yes	up
ENSG00000111110	1068	151	9.88	2.07	-2.72222	1.38445e-157	1.83447e-157	yes	down
ENSG00000112855	1334.02	263.47	36.8	9.57	-2.23999	1.59938e-157	2.11769e-157	yes	down
ENSG00000159873	1201	2724	18.5	51.65	1.28157	2.53922e-157	3.35961e-157	yes	up
ENSG00000277053	1822.14	501.05	37.99	10.71	-1.76253	3.43541e-157	4.54198e-157	yes	down
ENSG00000198961	3940	1762	49.39	26.98	-1.06091	4.65236e-157	6.14634e-157	yes	down
ENSG00000049759	977	2393	16.87	57.6	1.39247	5.21405e-157	6.88331e-157	yes	up
ENSG00000109111	6235	8995	65.13	110.01	0.628809	7.35912e-157	9.70793e-157	no	up
ENSG00000068654	1750	465	8.21	2.91	-1.81198	7.53342e-157	9.9305e-157	yes	down
ENSG00000170759	5120	7689	51.41	92.94	0.686727	9.72963e-157	1.28161e-156	no	up
ENSG00000187079	5263	2650	41.85	25.07	-0.889818	1.2903e-156	1.69835e-156	no	down
ENSG00000198315	917	96	8.09	0.91	-3.15574	1.76641e-156	2.32331e-156	yes	down
ENSG00000159259	1781.01	482	24.85	7.91	-1.78552	1.96014e-156	2.57622e-156	yes	down
ENSG00000125944	6860	3776	190.68	133.78	-0.761275	3.06204e-156	4.02149e-156	no	down
ENSG00000099381	1770	477	21.54	8.47	-1.79161	3.33526e-156	4.3771e-156	yes	down
ENSG00000102699	2696	991.86	29.8	12.92	-1.34254	4.2038e-156	5.51288e-156	yes	down
ENSG00000184083	789	53	11.06	0.85	-3.79589	4.79705e-156	6.28624e-156	yes	down
ENSG00000101442	709	27	16.76	0.79	-4.61468	4.85991e-156	6.36393e-156	yes	down
ENSG00000213694	891.94	87.99	12.67	1.51	-3.24146	6.84438e-156	8.95598e-156	yes	down
ENSG00000161542	1043	144.39	45.05	6.43	-2.75262	9.9603e-156	1.30236e-155	yes	down
ENSG00000102870	965	115	9.24	1.32	-2.96882	1.65606e-155	2.16381e-155	yes	down
ENSG00000072571	1727	3446	38.95	113.33	1.09673	2.00946e-155	2.62363e-155	yes	up
ENSG00000163872	1059.57	151.51	11.05	1.66	-2.70592	2.22671e-155	2.90516e-155	yes	down
ENSG00000213918	520.63	1662.82	7.53	28.53	1.77538	2.48855e-155	3.2444e-155	yes	up
ENSG00000130312	703	26	83.76	4.06	-4.65687	2.76895e-155	3.60732e-155	yes	down
ENSG00000087586	3282	1352	118.04	65.61	-1.1794	3.34168e-155	4.35029e-155	yes	down
ENSG00000261613	33.87	670	1.12	26.58	4.40616	6.68818e-155	8.70049e-155	yes	up
ENSG00000104853	4028	6363	108.35	223.51	0.759719	8.47112e-155	1.10118e-154	no	up
ENSG00000112769	2646	968	34.53	15.42	-1.35066	1.19214e-154	1.54856e-154	yes	down
ENSG00000182831	3136.06	5262	20.82	49.24	0.846733	2.71219e-154	3.52051e-154	no	up
ENSG00000183856	2292	765	26.24	9.07	-1.483	2.92043e-154	3.78805e-154	yes	down
ENSG00000001084	1020	2439	20.61	43.79	1.3578	4.89662e-154	6.34673e-154	yes	up
ENSG00000123297	863.97	81	61.31	5.97	-3.31491	5.58641e-154	7.23553e-154	yes	down
ENSG00000087510	1166	198	25.9	5.2	-2.45792	9.16113e-154	1.18569e-153	yes	down
ENSG00000196227	833.18	71	10.29	1.65	-3.45266	1.38619e-153	1.7928e-153	yes	down
ENSG00000115295	1431	317	25.72	6.76	-2.07439	1.58505e-153	2.04849e-153	yes	down
ENSG00000131981	9678	5878	748.81	533.86	-0.619308	2.73959e-153	3.53804e-153	no	down
ENSG00000130764	1781	491	27.78	8.26	-1.75882	3.04287e-153	3.92687e-153	yes	down
ENSG00000115762	3167.59	5291.5	51.6	99.32	0.840366	3.47021e-153	4.47511e-153	no	up
ENSG00000067082	694	26	9.87	0.47	-4.63828	4.36201e-153	5.62109e-153	yes	down
ENSG00000167196	1716.31	458.3	51.49	17.36	-1.80487	4.72819e-153	6.08856e-153	yes	down
ENSG00000132466	4062	1863	30.45	20.55	-1.02449	5.73215e-153	7.37605e-153	yes	down
ENSG00000089050	1394	301	26.25	7.18	-2.11132	5.76068e-153	7.40742e-153	yes	down
ENSG00000101189	1109	176	25.11	4.78	-2.55554	7.56247e-153	9.71724e-153	yes	down
ENSG00000116830	1645.4	423	22.12	6.8	-1.85963	7.67433e-153	9.85387e-153	yes	down
ENSG00000183458	1726.74	464.29	12.21	4.09	-1.79488	8.1927e-153	1.05119e-152	yes	down
ENSG00000153201	3744.68	1657.26	20.58	12.78	-1.07597	8.50723e-153	1.09076e-152	yes	down
ENSG00000103266	3726.44	1645.63	209.35	103.34	-1.07908	9.05707e-153	1.16042e-152	yes	down
ENSG00000124313	1643	422	37.7	14.42	-1.86094	9.14892e-153	1.17135e-152	yes	down
ENSG00000172939	2557	923	34.82	15.53	-1.36997	9.42025e-153	1.20522e-152	yes	down
ENSG00000156587	1488	346	80.08	22.11	-2.00446	9.99517e-153	1.27786e-152	yes	down
ENSG00000168246	881	89	16.47	2	-3.20719	1.38481e-152	1.76918e-152	yes	down
ENSG00000204520	537	1676	25.56	104.03	1.7421	1.5581e-152	1.98915e-152	yes	up
ENSG00000168291	2019.44	620.04	93.03	34.04	-1.60345	2.03425e-152	2.59516e-152	yes	down
ENSG00000108819	1881	546	27.88	9.72	-1.68445	2.44081e-152	3.1116e-152	yes	down
ENSG00000024048	1068	2499	7.9	22.35	1.32651	2.6508e-152	3.37687e-152	yes	up
ENSG00000066933	1475	341	12.01	2.85	-2.0128	3.20218e-152	4.07637e-152	yes	down
ENSG00000175066	1437	322.92	17.16	4.68	-2.05374	3.22299e-152	4.09994e-152	yes	down
ENSG00000082701	2579	938	26.7	23.19	-1.35908	3.31077e-152	4.2086e-152	yes	down
ENSG00000280184	37.82	670.29	0.97	20.92	4.24764	3.45561e-152	4.38958e-152	yes	up
ENSG00000134077	1241.64	2748.71	36.67	58.13	1.24658	4.22019e-152	5.357e-152	yes	up
ENSG00000148019	1394	303	29.64	10.07	-2.10177	4.23968e-152	5.3779e-152	yes	down
ENSG00000166886	915	102	23.01	3.52	-3.06513	4.66452e-152	5.91259e-152	yes	down
ENSG00000124782	1599	402	11.64	3.49	-1.89183	5.04327e-152	6.38813e-152	yes	down
ENSG00000129083	5518.2	8106.16	104.03	176.3	0.654896	5.20218e-152	6.58474e-152	no	up
ENSG00000106608	2546.97	920	46.75	19.14	-1.369	5.34576e-152	6.76167e-152	yes	down
ENSG00000117528	2663	989	49	23.19	-1.32893	7.46733e-152	9.43849e-152	yes	down
ENSG00000153786	4246	1991	89.84	54.89	-0.992536	9.09948e-152	1.14933e-151	no	down
ENSG00000175931	1599	403	23.01	5.96	-1.88824	1.21564e-151	1.53436e-151	yes	down
ENSG00000165410	2332.82	798	78.68	36.94	-1.44754	1.77762e-151	2.24209e-151	yes	down
ENSG00000117000	580	1741	5.47	19.84	1.68587	2.53797e-151	3.19885e-151	yes	up
ENSG00000134287	5601.61	2919	89.82	56.94	-0.840292	2.68012e-151	3.37562e-151	no	down
ENSG00000105355	3530	1527	112.28	57.78	-1.10889	2.85573e-151	3.59426e-151	yes	down
ENSG00000013364	2409	843	54.83	22.22	-1.41475	3.9446e-151	4.96123e-151	yes	down
ENSG00000175283	1096	174	34.47	6.56	-2.55501	4.7937e-151	6.02491e-151	yes	down
ENSG00000070444	1044.16	153.17	20.58	2.58	-2.66906	5.97674e-151	7.5065e-151	yes	down
ENSG00000135250	1595	403	40.98	10.11	-1.88463	6.97321e-151	8.75186e-151	yes	down
ENSG00000270641	234.37	1120.13	0.36	2.06	2.35688	8.3575e-151	1.04819e-150	yes	up
ENSG00000119401	724	3	12.15	0.06	-7.81481	8.37661e-151	1.04984e-150	yes	down
ENSG00000108774	3363.53	5512.87	145.45	285.65	0.812903	8.53174e-151	1.06853e-150	no	up
ENSG00000151632	1093.65	173.51	64.14	10.61	-2.55599	8.65314e-151	1.08298e-150	yes	down
ENSG00000117262	843.63	2154.49	28.95	92.42	1.45274	9.19793e-151	1.15035e-150	yes	up
ENSG00000084073	2052	3845.01	42.31	94.57	1.00603	1.1982e-150	1.49749e-150	yes	up
ENSG00000157500	1747.26	481.04	17.73	5.63	-1.76079	1.3083e-150	1.63395e-150	yes	down
ENSG00000130402	28338	32672	445.97	618.39	0.305393	1.4643e-150	1.82751e-150	no	up
ENSG00000104142	1441	329	22.96	6.17	-2.03084	1.806e-150	2.25238e-150	yes	down
ENSG00000117505	1669.87	3332.77	28.85	71.33	1.09706	1.86753e-150	2.32749e-150	yes	up
ENSG00000145623	5640.01	8231.06	72.59	132.4	0.645456	1.89959e-150	2.36579e-150	no	up
ENSG00000140443	775	56	7.05	1.11	-3.69062	2.36803e-150	2.94714e-150	yes	down
ENSG00000185238	1038	2442	26.29	75.86	1.33433	3.29152e-150	4.09361e-150	yes	up
ENSG00000100982	1175	209	34.89	7.39	-2.39101	4.05205e-150	5.03595e-150	yes	down
ENSG00000112029	928	110	29.23	4.26	-2.97655	5.38714e-150	6.69056e-150	yes	down
ENSG00000106683	1225	231	23.53	6.68	-2.30674	5.4705e-150	6.78936e-150	yes	down
ENSG00000182179	1029	149	47.07	4.82	-2.68778	6.84182e-150	8.48537e-150	yes	down
ENSG00000159079	2010	623	90.51	32.28	-1.58982	7.05913e-150	8.74879e-150	yes	down
ENSG00000146556	954.74	2316.76	15.01	30.6	1.379	7.14206e-150	8.84543e-150	yes	up
ENSG00000184007	5230	2670	131.41	97.59	-0.869896	7.31703e-150	9.05584e-150	no	down
ENSG00000158092	1459	340	53.62	13.67	-2.0013	1.74089e-149	2.1531e-149	yes	down
ENSG00000088682	3062	1241	141.24	63.37	-1.2029	1.77209e-149	2.19017e-149	yes	down
ENSG00000197037	865	88	15.34	1.96	-3.19705	1.9583e-149	2.41862e-149	yes	down
ENSG00000169136	2669.51	1002.54	97.13	41.99	-1.31284	2.00862e-149	2.47906e-149	yes	down
ENSG00000104131	2467	4371	77.31	164.24	0.925281	5.275e-149	6.50595e-149	no	up
ENSG00000060656	1571	396	24.61	6.07	-1.88804	5.32763e-149	6.56631e-149	yes	down
ENSG00000278540	3822	1727	39.93	24.24	-1.04598	5.6736e-149	6.98789e-149	yes	down
ENSG00000100412	6850.99	9611.17	163.15	278.08	0.588475	5.75259e-149	7.08029e-149	no	up
ENSG00000118482	1247	243	10.7	2.89	-2.25936	6.49354e-149	7.98674e-149	yes	down
ENSG00000174106	1177	2635	16.27	59.53	1.26276	7.95688e-149	9.77982e-149	yes	up
ENSG00000198799	707.01	36	4.8	0.36	-4.19559	7.97771e-149	9.79867e-149	yes	down
ENSG00000100413	2206.01	735.83	40.64	11.89	-1.48392	1.10199e-148	1.35259e-148	yes	down
ENSG00000198176	2955	1179	100.33	58.4	-1.22552	1.42015e-148	1.74191e-148	yes	down
ENSG00000221926	2319.72	801.44	64.87	27.1	-1.43321	1.95709e-148	2.39884e-148	yes	down
ENSG00000187951	870.32	91.51	30.14	3.34	-3.14947	2.36517e-148	2.89705e-148	yes	down
ENSG00000132436	666	23	13.07	0.52	-4.75574	2.39112e-148	2.92681e-148	yes	down
ENSG00000102910	3338.19	1419.8	40.43	22.65	-1.1333	3.35747e-148	4.10684e-148	yes	down
ENSG00000172216	2237.77	755.8	76.11	30.8	-1.46591	4.08088e-148	4.98829e-148	yes	down
ENSG00000084774	2876	1134	31.66	13.29	-1.24257	8.6785e-148	1.0601e-147	yes	down
ENSG00000141560	2046	650	76.16	29.31	-1.55422	1.1998e-147	1.46457e-147	yes	down
ENSG00000110925	1034	2420	23.32	62.6	1.32685	1.31327e-147	1.602e-147	yes	up
ENSG00000188707	911.51	107.82	19.44	2.76	-2.97956	1.65349e-147	2.01562e-147	yes	down
ENSG00000136045	1728	480	47.41	14.35	-1.74792	1.76769e-147	2.15337e-147	yes	down
ENSG00000197894	3131	1293	80.05	38.46	-1.17583	1.89311e-147	2.30458e-147	yes	down
ENSG00000079215	1132	196	31.9	5.89	-2.42987	2.10449e-147	2.56014e-147	yes	down
ENSG00000082482	790	65	18.95	2.3	-3.50327	2.11527e-147	2.57151e-147	yes	down
ENSG00000105011	2288	4127	92.7	212.84	0.951082	2.43448e-147	2.95755e-147	no	up
ENSG00000138496	1286	264	24.19	5.34	-2.18421	2.46825e-147	2.99654e-147	yes	down
ENSG00000179832	3572.86	1574	57.56	36.08	-1.08257	2.57462e-147	3.12354e-147	yes	down
ENSG00000181924	1291	267	128.66	31.33	-2.1735	5.20897e-147	6.31525e-147	yes	down
ENSG00000087365	6782.51	9508	172.73	279.78	0.587398	6.53519e-147	7.91775e-147	no	up
ENSG00000086598	5602.46	8147.7	139.73	244.67	0.640408	6.57778e-147	7.96393e-147	no	up
ENSG00000129347	1197.81	225.49	30.95	5.68	-2.30919	6.88884e-147	8.33489e-147	yes	down
ENSG00000133065	1300	2797	19.63	79.27	1.20544	7.09604e-147	8.57975e-147	yes	up
ENSG00000135686	2706	1035	46.38	19.89	-1.28646	8.2255e-147	9.93862e-147	yes	down
ENSG00000064687	2198	738	54.77	16.88	-1.47442	9.19275e-147	1.10998e-146	yes	down
ENSG00000160551	4909.03	2469.01	24.7	17.55	-0.89143	1.16726e-146	1.40845e-146	no	down
ENSG00000164104	3932	6167	229.38	425.84	0.749381	1.3177e-146	1.58891e-146	no	up
ENSG00000198700	4516.36	2202.06	33.39	20.84	-0.936232	1.54368e-146	1.86013e-146	no	down
ENSG00000100554	2041.7	3799.14	119.7	228.33	0.995977	1.86218e-146	2.24241e-146	no	up
ENSG00000144355	759	56	23.07	2.67	-3.66053	1.9855e-146	2.3893e-146	yes	down
ENSG00000141959	11343	7216	256.19	184.94	-0.552456	2.03027e-146	2.44153e-146	no	down
ENSG00000154518	4183	1979	310.6	176.42	-0.979691	2.15445e-146	2.58911e-146	no	down
ENSG00000204304	866	93	24.88	3.23	-3.11899	2.44553e-146	2.93694e-146	yes	down
ENSG00000244301	1162.18	211.09	31.82	7.2	-2.36083	2.49259e-146	2.99144e-146	yes	down
ENSG00000133657	4580	6938.9	70.03	108.82	0.699435	3.21031e-146	3.85021e-146	no	up
ENSG00000178919	697	3	12.37	0.06	-7.75998	5.82042e-146	6.97589e-146	yes	down
ENSG00000172037	11483	7330	381.44	243.17	-0.547539	7.41179e-146	8.8772e-146	no	down
ENSG00000112308	3377.89	1457	51.7	29.39	-1.11305	1.0536e-145	1.26107e-145	yes	down
ENSG00000172466	1556	3143	14.5	36.79	1.11438	1.36401e-145	1.6315e-145	yes	up
ENSG00000276073	34.12	635.3	0.62	13.94	4.31882	1.42098e-145	1.6985e-145	yes	up
ENSG00000130726	8352	4955	284.33	164.65	-0.653161	1.59171e-145	1.9013e-145	no	down
ENSG00000166938	1277.01	264	28.57	6.92	-2.17408	1.73804e-145	2.0747e-145	yes	down
ENSG00000100023	1914.31	585.02	51.91	12.28	-1.61019	1.87057e-145	2.23141e-145	yes	down
ENSG00000141564	1792	520	22.32	8.05	-1.68491	2.78395e-145	3.31876e-145	yes	down
ENSG00000116001	1782	515	36.56	14.59	-1.69078	3.48204e-145	4.14819e-145	yes	down
ENSG00000274276	356.22	1325.82	16.17	64.02	1.99612	3.6471e-145	4.34192e-145	yes	up
ENSG00000096063	2403	862	48.34	15.61	-1.379	4.24609e-145	5.05165e-145	yes	down
ENSG00000205746	1349.48	298.62	33.94	20.62	-2.07595	4.94347e-145	5.87741e-145	yes	down
ENSG00000126870	1261	258	24.58	6.03	-2.18905	6.67919e-145	7.93576e-145	yes	down
ENSG00000141985	5606	8129	144.11	251.94	0.636181	6.96977e-145	8.27549e-145	no	up
ENSG00000112992	4759.91	2378.82	72.16	39.9	-0.900613	1.02829e-144	1.22011e-144	no	down
ENSG00000225648	716.21	1923	57.84	187.74	1.52498	1.07587e-144	1.27573e-144	yes	up
ENSG00000137502	950	127	15.98	2.69	-2.80302	1.10557e-144	1.31007e-144	yes	down
ENSG00000111962	1000	147	20.48	4.27	-2.66604	1.77402e-144	2.10077e-144	yes	down
ENSG00000109787	1005.95	149.98	12.27	2.4	-2.64564	3.84123e-144	4.5457e-144	yes	down
ENSG00000135506	7823	10653	209.78	340.02	0.545542	4.21535e-144	4.98513e-144	no	up
ENSG00000172465	779	66	58.32	5.71	-3.46101	5.28395e-144	6.24473e-144	yes	down
ENSG00000091542	2126.79	707.59	51.38	20.87	-1.48762	6.10743e-144	7.21205e-144	yes	down
ENSG00000182253	1878.93	570.63	16.67	6.09	-1.61921	6.11054e-144	7.21205e-144	yes	down
ENSG00000157240	1032	161	8.67	1.63	-2.58024	6.98924e-144	8.24368e-144	yes	down
ENSG00000182704	1997	636	47.01	17.7	-1.55066	1.10291e-143	1.3e-143	yes	down
ENSG00000115415	6436	3566	97.2	64.14	-0.751782	1.38097e-143	1.62668e-143	no	down
ENSG00000108654	22556.5	16218.4	1057.67	628.64	-0.375836	2.29551e-143	2.70215e-143	no	down
ENSG00000090054	2959	4944	113.81	232.09	0.840644	2.45081e-143	2.88306e-143	no	up
ENSG00000166073	2377.05	853.89	43.31	19.07	-1.37697	3.08885e-143	3.63123e-143	yes	down
ENSG00000163430	18686.5	13071	353.43	255.45	-0.415551	3.42928e-143	4.02878e-143	no	down
ENSG00000265190	1751.01	504.61	62.34	20.84	-1.69487	3.54897e-143	4.16664e-143	yes	down
ENSG00000175215	5809	3122	90.21	52.59	-0.795744	5.23498e-143	6.14204e-143	no	down
ENSG00000070159	795	73	6.71	0.86	-3.34491	6.4291e-143	7.53811e-143	yes	down
ENSG00000173193	2005	643	19.27	8.45	-1.54064	6.59687e-143	7.72974e-143	yes	down
ENSG00000206538	1251	258	9.19	2.41	-2.17756	7.62186e-143	8.92488e-143	yes	down
ENSG00000089094	1387.75	322.35	30.79	7.09	-2.00597	1.03416e-142	1.21016e-142	yes	down
ENSG00000151612	623	15	6.82	0.14	-5.27612	1.0821e-142	1.26543e-142	yes	down
ENSG00000163346	1892	582	46.14	17.82	-1.60075	1.38887e-142	1.62311e-142	yes	down
ENSG00000168288	2758.08	4685.47	136.86	279.3	0.864605	1.61693e-142	1.88839e-142	no	up
ENSG00000113575	5623.49	8122.38	283.29	364.56	0.630512	1.64695e-142	1.92219e-142	no	up
ENSG00000089060	2104	700	43.48	17	-1.48763	2.01627e-142	2.35169e-142	yes	down
ENSG00000206337	626	17	17.31	0.73	-5.10248	2.03087e-142	2.36718e-142	yes	down
ENSG00000115275	906	114	20.21	3.11	-2.8904	2.24934e-142	2.62011e-142	yes	down
ENSG00000121864	711.37	46	32.41	1.13	-3.85082	3.03495e-142	3.53291e-142	yes	down
ENSG00000145425	8247.77	4907	745.9	525.17	-0.649088	3.61237e-142	4.20232e-142	no	down
ENSG00000189079	1413	336	13.04	5.2	-1.97215	4.08993e-142	4.75477e-142	yes	down
ENSG00000260708	79	740	12.38	135.71	3.32768	5.58198e-142	6.48514e-142	yes	up
ENSG00000148120	1305	285.01	99.31	19.74	-2.09489	6.22404e-142	7.22637e-142	yes	down
ENSG00000198556	417.13	1417.27	11.55	26.63	1.86462	9.09612e-142	1.05541e-141	yes	up
ENSG00000155329	247	1105	23.79	70.5	2.26154	1.06276e-141	1.2323e-141	yes	up
ENSG00000161638	3109	1306	96.78	49.68	-1.15122	1.2422e-141	1.43943e-141	yes	down
ENSG00000165102	2188.23	750.96	34.45	12.01	-1.44288	1.54715e-141	1.79164e-141	yes	down
ENSG00000170604	815	82	20.23	2.44	-3.21303	1.5704e-141	1.81738e-141	yes	down
ENSG00000115233	2450	4286	83.39	176.63	0.906925	2.28465e-141	2.64225e-141	no	up
ENSG00000116717	672	1835	36.98	107.25	1.54932	2.29462e-141	2.65205e-141	yes	up
ENSG00000196872	1615	439	35.76	11.87	-1.77917	2.36275e-141	2.72903e-141	yes	down
ENSG00000138385	3031.99	5016.83	125.77	265.33	0.826586	2.43251e-141	2.80779e-141	no	up
ENSG00000144647	701	44	17.56	1.32	-3.89376	3.26842e-141	3.77021e-141	yes	down
ENSG00000123975	1189	2602	221.61	564.55	1.22995	4.0103e-141	4.623e-141	yes	up
ENSG00000139154	1227.02	251	29.88	7.91	-2.18932	4.50362e-141	5.18832e-141	yes	down
ENSG00000197713	1604.78	434.77	56.85	16.61	-1.78398	5.46322e-141	6.28976e-141	yes	down
ENSG00000107164	3278	5317	73.7	174.23	0.797872	5.66428e-141	6.51703e-141	no	up
ENSG00000139182	2030	664	36.45	16.08	-1.51215	8.42351e-141	9.6854e-141	yes	down
ENSG00000101161	4533	2248	92.74	55.25	-0.911749	9.35055e-141	1.07444e-140	no	down
ENSG00000182405	105.04	798.75	0.93	8.53	3.02688	9.50682e-141	1.09169e-140	yes	up
ENSG00000167552	1112.55	200.97	42.25	11.27	-2.36874	1.02976e-140	1.18174e-140	yes	down
ENSG00000172725	3032.8	1262.53	110.21	53.91	-1.16426	1.10236e-140	1.26424e-140	yes	down
ENSG00000167112	2056.26	679.14	41.33	15.92	-1.49817	1.11577e-140	1.2788e-140	yes	down
ENSG00000135678	1941	615.04	29.17	8.85	-1.55797	1.16298e-140	1.33205e-140	yes	down
ENSG00000134744	1345.07	307	37.91	6.54	-2.0313	1.25607e-140	1.43774e-140	yes	down
ENSG00000135775	830	89	17.91	2.29	-3.12116	1.99352e-140	2.28039e-140	yes	down
ENSG00000132825	613	15	10.33	0.3	-5.25278	2.51219e-140	2.87185e-140	yes	down
ENSG00000253276	1091	193	20.27	5.37	-2.3989	4.61678e-140	5.27437e-140	yes	down
ENSG00000178685	2239	786	52.38	21.77	-1.41018	6.24981e-140	7.13542e-140	yes	down
ENSG00000278311	2665	1039	80.57	35.61	-1.25886	7.0535e-140	8.04785e-140	yes	down
ENSG00000028310	2375.52	866.32	64.9	30.75	-1.3552	9.41941e-140	1.07404e-139	yes	down
ENSG00000168495	526	1591	10.83	43.51	1.69687	1.01722e-139	1.15914e-139	yes	up
ENSG00000125676	4429.88	2185.9	90.96	49.74	-0.918965	2.07444e-139	2.36234e-139	no	down
ENSG00000136718	1569.26	421	90.07	29.02	-1.79812	2.11668e-139	2.40891e-139	yes	down
ENSG00000163602	1258	2687	10.18	26.19	1.19494	2.91424e-139	3.31446e-139	yes	up
ENSG00000197956	18757	13187	3012.59	2469.12	-0.408238	3.97165e-139	4.5142e-139	no	down
ENSG00000185721	1998	652	104.05	38.83	-1.51554	4.58823e-139	5.21168e-139	yes	down
ENSG00000121152	1067	185	36.11	8.35	-2.42789	6.32807e-139	7.18336e-139	yes	down
ENSG00000183696	1198	2600	66.86	174.37	1.21796	6.90517e-139	7.83347e-139	yes	up
ENSG00000186660	4094.65	1962.63	46.62	26.89	-0.960877	7.41074e-139	8.40165e-139	no	down
ENSG00000125834	1461	2964	12.55	30.27	1.12066	1.19728e-138	1.35651e-138	yes	up
ENSG00000075151	5059.62	2624.84	69.12	42.81	-0.846724	1.27949e-138	1.44873e-138	no	down
ENSG00000170043	1615	447	187.79	63.25	-1.75311	1.57536e-138	1.7826e-138	yes	down
ENSG00000108175	2252	799	18.14	8.14	-1.39486	1.85903e-138	2.10226e-138	yes	down
ENSG00000183207	3879	6021	218.02	342.23	0.734394	2.67684e-138	3.02515e-138	no	up
ENSG00000163739	601	14	56.24	1.19	-5.32379	6.35119e-138	7.17306e-138	yes	down
ENSG00000110880	4133	1994	69.49	46.82	-0.951449	6.95065e-138	7.84512e-138	no	down
ENSG00000130821	838	2069.97	18.86	69.07	1.40466	7.18949e-138	8.10956e-138	yes	up
ENSG00000140367	995	157	21.83	4.4	-2.56386	7.81943e-138	8.81453e-138	yes	down
ENSG00000138867	2921.76	4847.83	71.54	129.93	0.830577	9.23096e-138	1.03991e-137	no	up
ENSG00000061273	2741.33	1095.18	70.74	36.41	-1.22363	1.20266e-137	1.354e-137	yes	down
ENSG00000196123	1498	390	36.42	14.25	-1.84142	1.66377e-137	1.87195e-137	yes	down
ENSG00000092439	1825.78	562.28	19.3	7.61	-1.59908	1.85067e-137	2.08031e-137	yes	down
ENSG00000104518	3504.62	1580	133.24	72.51	-1.04926	1.85129e-137	2.08031e-137	yes	down
ENSG00000111817	1335.33	310.05	21.51	7.6	-2.00655	1.9003e-137	2.13403e-137	yes	down
ENSG00000270181	1256.1	272.58	15.36	4.01	-2.10412	1.91198e-137	2.1458e-137	yes	down
ENSG00000204463	3938	6083	132.81	240.03	0.727395	2.03065e-137	2.27755e-137	no	up
ENSG00000115183	2443	916	21.76	9.4	-1.31516	2.77454e-137	3.10992e-137	yes	down
ENSG00000147872	1208	251	43.57	12.23	-2.16679	3.64709e-137	4.08538e-137	yes	down
ENSG00000104549	1323	305	28.97	8.92	-2.01686	4.27229e-137	4.78271e-137	yes	down
ENSG00000130713	1584.36	436	57.62	30.65	-1.76142	8.00632e-137	8.95721e-137	yes	down
ENSG00000132305	2364	871	57.16	24.53	-1.34041	8.47076e-137	9.47088e-137	yes	down
ENSG00000132792	1666	3228	58.69	64.51	1.05433	8.6947e-137	9.71516e-137	yes	up
ENSG00000141027	4186	2037.21	51.23	34.7	-0.938902	1.32086e-136	1.47496e-136	no	down
ENSG00000101417	904.01	123.01	16.05	3.3	-2.77749	1.69019e-136	1.88619e-136	yes	down
ENSG00000146414	920.55	129.51	7.34	1.42	-2.72936	1.77012e-136	1.97416e-136	yes	down
ENSG00000122359	5991	3301	142.4	95.69	-0.759819	2.9717e-136	3.31217e-136	no	down
ENSG00000225733	3676	5755.44	71.32	142.24	0.746865	3.62292e-136	4.03548e-136	no	up
ENSG00000119048	902	2155	33.17	174.9	1.35656	3.79029e-136	4.21927e-136	yes	up
ENSG00000166004	1002.06	163.14	13.65	2.3	-2.51871	4.19292e-136	4.66455e-136	yes	down
ENSG00000135698	1117	213	97.14	27.26	-2.29063	8.27074e-136	9.19532e-136	yes	down
ENSG00000138326	9311	5768	2929.64	2013.92	-0.59079	9.01236e-136	1.00136e-135	no	down
ENSG00000089234	956	2232	14.39	40.56	1.32333	9.50027e-136	1.05491e-135	yes	up
ENSG00000119725	1376.79	2827.96	42.51	103.65	1.13853	9.80388e-136	1.08795e-135	yes	up
ENSG00000155393	821	93	19.42	2.05	-3.042	1.09598e-135	1.21546e-135	yes	down
ENSG00000187231	1089	201	17.23	12.11	-2.33766	1.13872e-135	1.26208e-135	yes	down
ENSG00000132182	5708	3103	47.18	30.68	-0.779246	1.24211e-135	1.37582e-135	no	down
ENSG00000131797	633.77	30.01	7.3	0.5	-4.30037	2.43032e-135	2.69026e-135	yes	down
ENSG00000210082	52914	42025.3	2373.47	2253.89	-0.232316	2.48278e-135	2.74662e-135	no	down
ENSG00000139194	1155.34	231.64	9.4	2.34	-2.21829	4.29561e-135	4.74915e-135	yes	down
ENSG00000133961	3572.25	1637	80.64	38.87	-1.0257	5.02467e-135	5.55175e-135	yes	down
ENSG00000007376	1573	436	59.65	18.97	-1.75104	9.25733e-135	1.02221e-134	yes	down
ENSG00000082516	981	157	10.78	2.08	-2.54341	9.87213e-135	1.08942e-134	yes	down
ENSG00000164808	2759	1119	83.96	50.17	-1.20186	1.05463e-134	1.1631e-134	yes	down
ENSG00000169155	673	1799	6.68	21.5	1.51859	1.13612e-134	1.25219e-134	yes	up
ENSG00000143878	578	1648	15.69	53.66	1.61165	1.53029e-134	1.68558e-134	yes	up
ENSG00000171346	985.26	159.16	56.72	10.86	-2.52995	1.61659e-134	1.77954e-134	yes	down
ENSG00000184047	1353.09	2785.67	81.64	173.78	1.14184	2.37499e-134	2.61278e-134	yes	up
ENSG00000198131	717.64	58.86	29.61	6.87	-3.50783	3.21782e-134	3.53782e-134	yes	down
ENSG00000185090	1738	525	48.79	16.92	-1.62696	3.36838e-134	3.70106e-134	yes	down
ENSG00000134250	6152.13	3433.05	32.13	21.98	-0.74152	3.85782e-134	4.23623e-134	no	down
ENSG00000134318	2875	1195	22.77	10.35	-1.16648	7.21822e-134	7.92137e-134	yes	down
ENSG00000123636	1085.78	203.52	21.94	4.96	-2.31541	9.20984e-134	1.01008e-133	yes	down
ENSG00000214826	1351.95	327.26	14.54	4.28	-1.94646	9.28468e-134	1.01766e-133	yes	down
ENSG00000143198	2715	1096	250.77	118.36	-1.20863	9.41795e-134	1.03163e-133	yes	down
ENSG00000121057	1038	183	16.37	5.32	-2.40382	1.14033e-133	1.24834e-133	yes	down
ENSG00000153560	2903	1214	57.71	22.71	-1.1577	1.48032e-133	1.61953e-133	yes	down
ENSG00000140319	8533	11306	657.26	1113.02	0.506039	1.48437e-133	1.62297e-133	no	up
ENSG00000217555	1891.85	611.87	417.25	159.64	-1.52843	2.06744e-133	2.25909e-133	yes	down
ENSG00000170633	1682.25	497.65	72.08	25.78	-1.65711	2.29937e-133	2.51099e-133	yes	down
ENSG00000170456	1408	356	11.28	3.39	-1.88362	2.46762e-133	2.69307e-133	yes	down
ENSG00000149483	1211.28	261.35	96.69	17.84	-2.1124	2.89668e-133	3.1594e-133	yes	down
ENSG00000095752	31.76	581.83	0.44	14.51	4.29539	3.96462e-133	4.32156e-133	yes	up
ENSG00000169908	760	75	30.47	3.55	-3.24096	4.12305e-133	4.4915e-133	yes	down
ENSG00000227543	39.01	601.2	1.72	32.6	4.046	4.53398e-133	4.93613e-133	yes	up
ENSG00000254681	1878.19	605.78	37.06	13.51	-1.5324	5.82385e-133	6.33654e-133	yes	down
ENSG00000106344	1794.69	559.92	43.26	20.91	-1.58037	6.69261e-133	7.27734e-133	yes	down
ENSG00000117143	3371	5354	99.6	192.33	0.767516	7.27232e-133	7.90288e-133	no	up
ENSG00000139197	1317	313	34.01	10.23	-1.97295	1.15344e-132	1.25268e-132	yes	down
ENSG00000039319	1673.08	494.98	17.18	9.82	-1.65699	1.23512e-132	1.34058e-132	yes	down
ENSG00000164050	1410	359	29.49	4.96	-1.87356	1.41981e-132	1.5401e-132	yes	down
ENSG00000092964	1831	581	24.41	9.58	-1.55595	1.48659e-132	1.61155e-132	yes	down
ENSG00000177082	1438.02	373.36	37.93	10.71	-1.84537	1.84766e-132	2.00176e-132	yes	down
ENSG00000128311	994	167	62.05	12.74	-2.47332	2.62153e-132	2.83845e-132	yes	down
ENSG00000172845	2973	1264	50.23	29.8	-1.13385	2.62839e-132	2.84415e-132	yes	down
ENSG00000144827	1050	191	29.57	6.24	-2.35867	2.94135e-132	3.18086e-132	yes	down
ENSG00000168522	1503.37	407.26	73.16	22.41	-1.7841	3.21909e-132	3.47912e-132	yes	down
ENSG00000070961	2192	788	23.78	14.45	-1.37591	4.35614e-132	4.70516e-132	yes	down
ENSG00000119321	2301.23	852.36	30.46	14.23	-1.3328	4.47902e-132	4.83495e-132	yes	down
ENSG00000172057	1109.85	218.32	36.21	9.82	-2.24577	8.469e-132	9.13646e-132	yes	down
ENSG00000198211	102.21	756.49	7.83	57.6	2.98786	8.74143e-132	9.42465e-132	yes	up
ENSG00000242028	181.02	929.03	5.62	32.07	2.45965	1.0318e-131	1.11178e-131	yes	up
ENSG00000173848	2011	685	41.15	18.68	-1.45366	1.13042e-131	1.2173e-131	yes	down
ENSG00000131153	1851	595	43.83	18.61	-1.53727	1.14574e-131	1.23305e-131	yes	down
ENSG00000118564	1553	435	56.69	34.22	-1.7359	1.71578e-131	1.84542e-131	yes	down
ENSG00000182463	780.96	85	8.67	1.8	-3.09964	2.02578e-131	2.17743e-131	yes	down
ENSG00000177565	1766	549	22.5	8.75	-1.58553	2.02691e-131	2.17743e-131	yes	down
ENSG00000239857	1312.28	2708.94	46.62	101.74	1.14573	2.08146e-131	2.23468e-131	yes	up
ENSG00000244509	2343	880	53.72	23.96	-1.31271	2.26287e-131	2.42799e-131	yes	down
ENSG00000146463	1869	606	20.36	7.94	-1.5248	2.26584e-131	2.4297e-131	yes	down
ENSG00000242498	2707.64	1102.24	23.91	11.08	-1.19652	2.5637e-131	2.74746e-131	yes	down
ENSG00000105855	1187.15	254.97	9.18	2.53	-2.11903	3.6778e-131	3.93905e-131	yes	down
ENSG00000114302	2722.96	1113	37.31	20.79	-1.19065	4.88284e-131	5.22654e-131	yes	down
ENSG00000148660	1800.03	570.01	38.39	12.84	-1.55889	1.06238e-130	1.13648e-130	yes	down
ENSG00000146278	868	119	29.11	4.72	-2.76666	1.28485e-130	1.37364e-130	yes	down
ENSG00000114125	1439	379.05	79.56	24.11	-1.82453	1.5291e-130	1.63379e-130	yes	down
ENSG00000163814	2259	834	22.43	10.19	-1.33749	2.21996e-130	2.37052e-130	yes	down
ENSG00000130813	1343.85	331.92	44.91	13.4	-1.91739	2.25421e-130	2.40566e-130	yes	down
ENSG00000198589	2761	1140	27.24	16.13	-1.17608	2.63853e-130	2.81412e-130	yes	down
ENSG00000132849	1306	314	12.62	3.32	-1.95624	3.96696e-130	4.22842e-130	yes	down
ENSG00000187954	2998	4872.06	97.34	125.82	0.800607	4.2806e-130	4.56e-130	no	up
ENSG00000178802	1005.79	176.47	59.96	9.98	-2.41076	5.16802e-130	5.50206e-130	yes	down
ENSG00000196372	569	15	13.33	0.86	-5.14532	7.14011e-130	7.59707e-130	yes	down
ENSG00000166822	629.57	36	16.41	1.28	-4.02822	1.01911e-129	1.08368e-129	yes	down
ENSG00000111481	2615	4393	123.16	217.83	0.848471	1.38144e-129	1.4681e-129	no	up
ENSG00000184056	748	76	19.84	4.49	-3.19889	1.47059e-129	1.56191e-129	yes	down
ENSG00000102384	840	110	12.63	3.55	-2.83281	1.55696e-129	1.65266e-129	yes	down
ENSG00000065534	1373.49	349	12.25	3.45	-1.87647	1.84867e-129	1.96113e-129	yes	down
ENSG00000177888	376	1284	2.57	10.58	1.87192	2.69965e-129	2.86217e-129	yes	up
ENSG00000100395	1509.91	418.96	28.02	9.02	-1.7495	2.80366e-129	2.97068e-129	yes	down
ENSG00000147649	3209	5121	43.67	84.1	0.774377	4.09884e-129	4.34043e-129	no	up
ENSG00000261556	1086.66	2377.54	42.03	136.37	1.22964	4.51403e-129	4.77726e-129	yes	up
ENSG00000176890	5705.25	3150.1	237.81	148.15	-0.756817	5.6712e-129	5.99834e-129	no	down
ENSG00000054965	2106	750	22.64	9.82	-1.38947	7.32691e-129	7.74496e-129	yes	down
ENSG00000173894	598	27	9.62	0.94	-4.36904	8.23411e-129	8.69877e-129	yes	down
ENSG00000173221	1063	204	120.4	19.7	-2.28143	1.00991e-128	1.06626e-128	yes	down
ENSG00000166164	2405.26	928.8	65.7	28.7	-1.27268	1.40903e-128	1.48678e-128	yes	down
ENSG00000242588	1949.94	661.22	17.98	7.37	-1.46015	1.41457e-128	1.49174e-128	yes	down
ENSG00000058729	548	1567	10.04	38.46	1.61583	1.69133e-128	1.78254e-128	yes	up
ENSG00000114993	735	73	34.48	3.98	-3.2317	1.76448e-128	1.85854e-128	yes	down
ENSG00000187741	2987.33	1291.69	116.75	49.92	-1.10952	1.94167e-128	2.04397e-128	yes	down
ENSG00000212747	679.23	54	22.16	2.11	-3.55279	2.19082e-128	2.30488e-128	yes	down
ENSG00000131143	15348	10590	2121.22	1740.2	-0.435273	2.36344e-128	2.48503e-128	no	down
ENSG00000253304	737.13	73.99	18.81	2.26	-3.21644	2.56365e-128	2.69394e-128	yes	down
ENSG00000150768	2126	764	41.16	18.48	-1.37642	3.04914e-128	3.20222e-128	yes	down
ENSG00000141569	748	78	20.92	2.61	-3.16142	3.23645e-128	3.39693e-128	yes	down
ENSG00000160305	2099.93	749	26.48	14.55	-1.38723	3.46846e-128	3.63831e-128	yes	down
ENSG00000186141	823.7	1990.08	25.63	41.32	1.37271	3.8627e-128	4.04947e-128	yes	up
ENSG00000042088	675	53	23.18	2.24	-3.57075	4.38608e-128	4.59546e-128	yes	down
ENSG00000010292	6960.57	4074.7	87.08	57.56	-0.672436	6.28939e-128	6.58575e-128	no	down
ENSG00000172667	1313.69	323.5	10.62	3.58	-1.92171	7.18721e-128	7.52146e-128	yes	down
ENSG00000100324	1159	250	22.24	6.19	-2.11281	1.25135e-127	1.30878e-127	yes	down
ENSG00000104408	2270	3941	112.43	224.35	0.895945	1.5345e-127	1.60398e-127	no	up
ENSG00000134851	1847	607	69.96	27.36	-1.50534	1.89549e-127	1.98015e-127	yes	down
ENSG00000107864	113	764	1	8.68	2.85733	2.03429e-127	2.1239e-127	yes	up
ENSG00000139437	788.58	94.28	18.09	2.43	-2.96416	2.97147e-127	3.10055e-127	yes	down
ENSG00000197562	741	77	19.6	2.26	-3.16647	3.24239e-127	3.38127e-127	yes	down
ENSG00000123080	2901	1244	106.81	60.47	-1.12149	6.29251e-127	6.55819e-127	yes	down
ENSG00000106443	818	106	15.33	2.95	-2.84796	7.21251e-127	7.51264e-127	yes	down
ENSG00000196155	3505	1637	64.72	53.7	-0.998285	8.13108e-127	8.46448e-127	no	down
ENSG00000122218	8972	11696	116.39	182.07	0.482589	8.75999e-127	9.11386e-127	no	up
ENSG00000077044	1432	386	17.24	5.68	-1.79128	1.00114e-126	1.04098e-126	yes	down
ENSG00000100294	657	49	31.91	3.82	-3.64496	1.25103e-126	1.30005e-126	yes	down
ENSG00000100644	21397.2	24937	448.55	620.9	0.320938	1.62295e-126	1.68556e-126	no	up
ENSG00000182173	895	137	36.82	7.95	-2.60764	1.73848e-126	1.80449e-126	yes	down
ENSG00000170638	2001.93	698.58	58.38	24.96	-1.41882	1.81324e-126	1.881e-126	yes	down
ENSG00000028203	1688	523	54.89	12.45	-1.59036	3.00259e-126	3.11298e-126	yes	down
ENSG00000148606	1487	416	13.39	4.42	-1.73767	3.6353e-126	3.76676e-126	yes	down
ENSG00000047410	5596.91	3094	49.26	36.87	-0.755082	4.58567e-126	4.74873e-126	no	down
ENSG00000132613	8968.58	5603.93	120.11	113.31	-0.578365	5.07805e-126	5.25557e-126	no	down
ENSG00000197879	7436	4446	105.37	72.75	-0.641944	6.5608e-126	6.78621e-126	no	down
ENSG00000136295	4813	2538	64.94	38.88	-0.823169	7.77477e-126	8.03723e-126	no	down
ENSG00000087152	1024	2267	27.71	68.33	1.24664	8.34751e-126	8.6243e-126	yes	up
ENSG00000203995	834	114	13.37	2.07	-2.77094	8.87937e-126	9.16848e-126	yes	down
ENSG00000196502	640.41	44.91	15.28	1.53	-3.73381	1.30433e-125	1.34602e-125	yes	down
ENSG00000164924	11814	14776.3	276.6	468.83	0.422867	1.36793e-125	1.41084e-125	no	up
ENSG00000130699	1212	280	20.67	6.63	-2.01382	1.61699e-125	1.66674e-125	yes	down
ENSG00000143702	2315.2	887.12	35.01	15.14	-1.28386	1.6521e-125	1.70195e-125	yes	down
ENSG00000280789	624.04	39.88	25.11	1.92	-3.86783	2.1853e-125	2.24993e-125	yes	down
ENSG00000270629	5605.26	3105.24	500.83	282.26	-0.752001	2.27258e-125	2.33845e-125	no	down
ENSG00000213347	768.35	89.79	60.82	7.19	-2.99706	2.38046e-125	2.44804e-125	yes	down
ENSG00000100364	3613	1718	80.69	47.41	-0.972392	3.55794e-125	3.65684e-125	no	down
ENSG00000171150	574	24	8.18	0.43	-4.47987	3.75003e-125	3.85204e-125	yes	down
ENSG00000161888	581	26.35	35.16	3.4	-4.36259	4.06979e-125	4.17809e-125	yes	down
ENSG00000162889	2177	3802	48.36	102.39	0.904492	4.54814e-125	4.66648e-125	no	up
ENSG00000131941	607.33	35	10.99	0.81	-4.01698	5.35629e-125	5.4925e-125	yes	down
ENSG00000101138	1541	448	47.06	19.09	-1.68222	6.20739e-125	6.36158e-125	yes	down
ENSG00000206418	948	162	30.09	5.95	-2.44882	7.25802e-125	7.43404e-125	yes	down
ENSG00000007968	804	104	9.62	1.43	-2.85054	7.63954e-125	7.82032e-125	yes	down
ENSG00000196876	1005.04	186.61	8.25	2.32	-2.32908	7.98309e-125	8.16731e-125	yes	down
ENSG00000162377	1044	203.82	17.58	5.18	-2.25668	8.0563e-125	8.23748e-125	yes	down
ENSG00000198836	3455	5377	41.99	84.44	0.738191	8.10753e-125	8.2851e-125	no	up
ENSG00000115266	431.8	1355.82	3.86	15.04	1.75081	1.26166e-124	1.28855e-124	yes	up
ENSG00000182372	182.7	901.31	5.08	32.79	2.40262	1.801e-124	1.83834e-124	yes	up
ENSG00000172046	2444	970	38.35	26.25	-1.23311	2.06973e-124	2.11143e-124	yes	down
ENSG00000123485	2073	747.96	44.04	20.13	-1.37061	2.64757e-124	2.69937e-124	yes	down
ENSG00000166548	2790.63	1186.9	56.09	33.4	-1.13332	3.20739e-124	3.26827e-124	yes	down
ENSG00000104825	593	1615.01	25.47	67.2	1.54551	3.24072e-124	3.30034e-124	yes	up
ENSG00000131115	369.21	1247	12.77	45.35	1.85602	3.30411e-124	3.36298e-124	yes	up
ENSG00000143376	935	158	8.33	2.4	-2.46497	4.24209e-124	4.3152e-124	yes	down
ENSG00000005339	2678	4422	19.42	38.69	0.823618	4.62248e-124	4.69947e-124	no	up
ENSG00000101210	5099	2753	176.84	115.11	-0.789135	5.30612e-124	5.39143e-124	no	down
ENSG00000154174	2152.78	3761.74	30.23	62.72	0.905274	6.07744e-124	6.17162e-124	no	up
ENSG00000071994	1667	519	84.08	19.81	-1.58337	6.37077e-124	6.46582e-124	yes	down
ENSG00000181016	9.82	499.52	0.82	29.65	5.76875	7.43019e-124	7.53676e-124	yes	up
ENSG00000187778	1392	374	57.12	16.23	-1.79597	1.11465e-123	1.12999e-123	yes	down
ENSG00000139990	2289	879	33.85	16.45	-1.28071	1.20854e-123	1.22447e-123	yes	down
ENSG00000063438	3379	1571	43.1	22.68	-1.00484	1.22913e-123	1.24463e-123	yes	down
ENSG00000104388	1844	3362	61.57	177.1	0.966556	1.25898e-123	1.27414e-123	no	up
ENSG00000124279	614	39	36.18	1.96	-3.87662	1.39123e-123	1.40717e-123	yes	down
ENSG00000116584	1554	459	36.35	14.21	-1.65935	1.39492e-123	1.41011e-123	yes	down
ENSG00000215041	1122.84	242.88	28.8	8.65	-2.10876	2.05533e-123	2.07653e-123	yes	down
ENSG00000162623	391.41	1281.02	7.23	41.14	1.81062	2.27805e-123	2.30025e-123	yes	up
ENSG00000136938	4229	2148	206.27	125.35	-0.877247	2.80454e-123	2.83027e-123	no	down
ENSG00000114853	1150	256	13	3.32	-2.06734	3.05378e-123	3.08005e-123	yes	down
ENSG00000163781	2594	1068	51.62	22.46	-1.18019	3.25087e-123	3.27698e-123	yes	down
ENSG00000149428	5312	7539	91.65	152.92	0.605193	3.28113e-123	3.30561e-123	no	up
ENSG00000095139	5450	7697.18	108.84	192.88	0.598149	3.47309e-123	3.49703e-123	no	up
ENSG00000154473	4322	2214	230.63	132.59	-0.864969	5.15215e-123	5.18473e-123	no	down
ENSG00000135709	862	130	7.83	1.61	-2.6291	5.64966e-123	5.68217e-123	yes	down
ENSG00000171488	847	124	7.15	1.26	-2.67195	5.76665e-123	5.79657e-123	yes	down
ENSG00000167670	2054	742	51.8	23.16	-1.36887	6.01047e-123	6.03824e-123	yes	down
ENSG00000179918	2098	768	52.38	23.02	-1.34976	6.52709e-123	6.55356e-123	yes	down
ENSG00000164045	782	1896	15.33	40.05	1.37779	7.45492e-123	7.48093e-123	yes	up
ENSG00000105085	426.02	1335.78	9.88	32.55	1.74876	1.28828e-122	1.29205e-122	yes	up
ENSG00000250571	1456.28	410.48	36.22	9.89	-1.72683	1.5387e-122	1.54234e-122	yes	down
ENSG00000160703	1057	215	22.3	5.36	-2.19749	2.34749e-122	2.35171e-122	yes	down
ENSG00000142166	1715	551	39.17	18.64	-1.53801	3.1807e-122	3.18463e-122	yes	down
ENSG00000244754	1142.02	255	29.87	7.67	-2.06294	4.5217e-122	4.52474e-122	yes	down
ENSG00000105379	2625.68	1093.04	261.9	120.35	-1.16427	4.56195e-122	4.56246e-122	yes	down
ENSG00000100403	7014	4165.98	70.21	50.19	-0.651506	5.5145e-122	5.51202e-122	no	down
ENSG00000180530	1338.81	351.69	10.69	3.48	-1.8285	6.01941e-122	6.01333e-122	yes	down
ENSG00000144711	974	179	8.22	1.78	-2.34389	6.23378e-122	6.224e-122	yes	down
ENSG00000104611	1263	314	32.8	10.69	-1.90794	7.4393e-122	7.42347e-122	yes	down
ENSG00000266094	985	184	20.71	4.55	-2.32034	7.77665e-122	7.75576e-122	yes	down
ENSG00000198231	3896	1930	83.47	46.11	-0.913318	1.33919e-121	1.33485e-121	no	down
ENSG00000075218	1954	689	52.9	19.36	-1.40378	1.51238e-121	1.50663e-121	yes	down
ENSG00000035141	1077	226	40.47	10.38	-2.15255	1.62589e-121	1.6188e-121	yes	down
ENSG00000164062	3197	1463	125.64	65.49	-1.02771	1.96479e-121	1.95513e-121	yes	down
ENSG00000176715	1865	638.23	41.72	15.01	-1.44695	1.99179e-121	1.9809e-121	yes	down
ENSG00000124459	544	19	10.47	0.52	-4.73946	2.15019e-121	2.13724e-121	yes	down
ENSG00000131462	2141.16	800.19	92.93	41.57	-1.3199	3.15557e-121	3.13481e-121	yes	down
ENSG00000116212	2010	723	79.84	36.65	-1.37505	3.58336e-121	3.55781e-121	yes	down
ENSG00000235954	184.2	889.74	15.05	167.68	2.37219	4.18867e-121	4.15648e-121	yes	up
ENSG00000181827	997	191	7.26	1.64	-2.28395	5.1832e-121	5.1405e-121	yes	down
ENSG00000168061	672	62	31.99	3.62	-3.33805	6.56674e-121	6.50903e-121	yes	down
ENSG00000119917	572	29	14.68	0.9	-4.20182	6.97475e-121	6.90961e-121	yes	down
ENSG00000005194	3732	1823	138.31	84.27	-0.933559	7.3198e-121	7.24741e-121	no	down
ENSG00000166441	9979	6437	830.68	635.49	-0.532432	7.96408e-121	7.88093e-121	no	down
ENSG00000154845	2645	1111	54.64	27.92	-1.15133	8.26295e-121	8.17215e-121	yes	down
ENSG00000117724	5542	3095	61.8	51.98	-0.740392	1.02343e-120	1.01163e-120	no	down
ENSG00000166681	3212	1478	298.13	163.26	-1.01975	1.81509e-120	1.79315e-120	yes	down
ENSG00000183527	1434	405	126.94	43.19	-1.72398	2.02567e-120	2.00008e-120	yes	down
ENSG00000171862	2136.84	801.09	23.79	18.22	-1.31537	2.34543e-120	2.31452e-120	yes	down
ENSG00000137145	857.61	133	9.97	2.41	-2.58882	2.44225e-120	2.40873e-120	yes	down
ENSG00000215908	1298.83	336.32	73.92	22.44	-1.84923	3.63389e-120	3.58203e-120	yes	down
ENSG00000125826	2409	4052	83.1	173.01	0.850275	4.16255e-120	4.10088e-120	no	up
ENSG00000276850	661.52	59.94	54.62	7.33	-3.36412	8.04926e-120	7.92563e-120	yes	down
ENSG00000181220	1006	2201	17.44	46.19	1.2296	1.25292e-119	1.233e-119	yes	up
ENSG00000168538	1085	234	15.06	5.8	-2.11304	1.26864e-119	1.24777e-119	yes	down
ENSG00000145592	11222	7422	1751.47	1353.45	-0.496375	1.31845e-119	1.29605e-119	no	down
ENSG00000197780	524	1480	53.17	177.55	1.59803	1.40404e-119	1.37942e-119	yes	up
ENSG00000183495	2867.34	1258.5	20.1	11.82	-1.08793	1.47502e-119	1.44836e-119	yes	down
ENSG00000243646	1389.6	384.38	49.89	15.59	-1.75399	1.4869e-119	1.45922e-119	yes	down
ENSG00000149187	3710	1816.36	51.79	36.63	-0.930294	1.81061e-119	1.77593e-119	no	down
ENSG00000152234	9032	5720	309.29	233.55	-0.558955	1.92503e-119	1.88712e-119	no	down
ENSG00000041357	6134	3537	604.02	416.2	-0.694227	2.17913e-119	2.13504e-119	no	down
ENSG00000100503	1511	449	11.13	5.51	-1.65064	2.47278e-119	2.42142e-119	yes	down
ENSG00000118454	1227	303	19.43	5.7	-1.91767	3.11887e-119	3.05241e-119	yes	down
ENSG00000113716	1876.04	3368.26	27.43	46.23	0.944388	3.17958e-119	3.11013e-119	no	up
ENSG00000182310	587	36	39.74	3.72	-3.92722	3.23781e-119	3.16534e-119	yes	down
ENSG00000161267	656	59	24.2	2.87	-3.37483	3.7969e-119	3.70988e-119	yes	down
ENSG00000035928	1680	542	35.73	12.91	-1.53202	4.25829e-119	4.15842e-119	yes	down
ENSG00000119812	797	111	38.44	2.98	-2.74394	4.40557e-119	4.29989e-119	yes	down
ENSG00000171246	1748	3201	21.19	45.37	0.972893	4.57078e-119	4.45869e-119	no	up
ENSG00000204175	837	127	5.4	0.95	-2.62032	4.88474e-119	4.76235e-119	yes	down
ENSG00000163728	1288	334	29.47	13.89	-1.84714	5.3242e-119	5.18796e-119	yes	down
ENSG00000128408	555.01	26	21.3	0.81	-4.31586	5.55641e-119	5.41127e-119	yes	down
ENSG00000124766	739	89	7.45	1.08	-2.95362	5.70024e-119	5.54831e-119	yes	down
ENSG00000146830	3290	1538	44.82	26.16	-0.996957	6.70115e-119	6.51898e-119	no	down
ENSG00000169398	4210	2163	88.86	59.62	-0.860711	6.82739e-119	6.63817e-119	no	down
ENSG00000180747	5658.67	7883.49	119.06	208.29	0.578447	7.14273e-119	6.94098e-119	no	up
ENSG00000116199	1966	706	20.65	8.37	-1.37745	7.14895e-119	6.94324e-119	yes	down
ENSG00000136244	550	3	49.8	0.44	-7.41825	7.24226e-119	7.03003e-119	yes	down
ENSG00000168807	5757	3266	38.71	25.21	-0.717717	8.46398e-119	8.21148e-119	no	down
ENSG00000168872	5461.69	3052.29	120.17	77.63	-0.73938	1.02273e-118	9.9168e-119	no	down
ENSG00000142794	903.23	155.11	17.78	3.1	-2.44173	1.13501e-118	1.09995e-118	yes	down
ENSG00000100104	547.52	24.05	15.12	0.5	-4.40873	1.31169e-118	1.27048e-118	yes	down
ENSG00000163291	1532.1	462.64	23.52	8.43	-1.62747	1.37612e-118	1.33217e-118	yes	down
ENSG00000204713	1368	376	29.43	10.19	-1.76319	1.42884e-118	1.38245e-118	yes	down
ENSG00000164466	2565	1071.28	73.91	48.37	-1.15955	1.56202e-118	1.51049e-118	yes	down
ENSG00000158109	1009	2198	26.87	70.23	1.22334	1.58316e-118	1.5301e-118	yes	up
ENSG00000132819	653	59	19.27	1.93	-3.36822	2.02002e-118	1.95126e-118	yes	down
ENSG00000167004	16454.4	19592.5	322.26	483.43	0.351906	2.44994e-118	2.36526e-118	no	up
ENSG00000214753	4540.9	2398.05	53.76	33.64	-0.821041	2.57849e-118	2.48802e-118	no	down
ENSG00000094804	2444	997	39.76	21.4	-1.1935	2.94761e-118	2.84265e-118	yes	down
ENSG00000178127	2300.67	908.99	210.01	99.49	-1.23964	3.43483e-118	3.31074e-118	yes	down
ENSG00000232956	646	57	43.27	5.89	-3.40243	3.86677e-118	3.72506e-118	yes	down
ENSG00000082438	5148	2831	74.46	48	-0.762625	4.24516e-118	4.08736e-118	no	down
ENSG00000175711	672.07	66.14	13.11	2.19	-3.24494	4.58706e-118	4.41417e-118	yes	down
ENSG00000197296	1004.8	200.8	13.1	3.15	-2.223	4.72233e-118	4.5419e-118	yes	down
ENSG00000176046	527	1476	21.08	73.83	1.58589	5.6691e-118	5.44954e-118	yes	up
ENSG00000161813	2247	3830	42.13	98.17	0.869419	6.02221e-118	5.78586e-118	no	up
ENSG00000105875	575	34	13.02	1.27	-3.97988	8.69922e-118	8.35331e-118	yes	down
ENSG00000031003	1354	371	17.91	6.45	-1.76766	8.74338e-118	8.39119e-118	yes	down
ENSG00000120709	2009.39	3527.26	32.35	58.61	0.911866	9.56027e-118	9.17024e-118	no	up
ENSG00000164237	2030.69	748.37	85.13	41.79	-1.34007	9.58045e-118	9.18465e-118	yes	down
ENSG00000152580	701.14	77	7.57	0.61	-3.0867	9.6912e-118	9.28583e-118	yes	down
ENSG00000213463	1190.15	288.88	14.35	3.9	-1.94253	1.12003e-117	1.0726e-117	yes	down
ENSG00000102921	818	122	8.47	4.55	-2.64514	1.46954e-117	1.40656e-117	yes	down
ENSG00000139613	3523.65	1701.69	63.07	33.42	-0.950027	1.47567e-117	1.41166e-117	no	down
ENSG00000100722	2313.62	920.03	60.02	28.5	-1.23032	1.81876e-117	1.73894e-117	yes	down
ENSG00000181467	672	67	4.67	0.56	-3.22615	1.83813e-117	1.75652e-117	yes	down
ENSG00000163947	777	106	20.48	3.81	-2.77378	1.93588e-117	1.84894e-117	yes	down
ENSG00000141956	1260	324.24	15.8	5.73	-1.85821	2.17339e-117	2.07467e-117	yes	down
ENSG00000205060	1243.03	316	17.3	3.93	-1.87579	2.70543e-117	2.58117e-117	yes	down
ENSG00000196715	1660	537	17.59	7.56	-1.52811	2.86522e-117	2.73215e-117	yes	down
ENSG00000141568	1741	582.95	24.2	16.38	-1.4784	4.02018e-117	3.83142e-117	yes	down
ENSG00000136717	2581	1088	75.43	42.85	-1.14618	4.20412e-117	4.00459e-117	yes	down
ENSG00000115993	1140	266	10.48	2.89	-1.99946	4.23897e-117	4.03562e-117	yes	down
ENSG00000168036	9706	12355	175.09	272.36	0.448221	4.49895e-117	4.28085e-117	no	up
ENSG00000164080	1269	330	9.96	2.4	-1.84308	6.26865e-117	5.96156e-117	yes	down
ENSG00000073614	2250.94	3826	17.74	32.94	0.865384	6.50304e-117	6.18118e-117	no	up
ENSG00000140259	1644	3048	50.14	111.18	0.990728	6.99027e-117	6.64075e-117	no	up
ENSG00000160908	370.99	1213.07	14.32	68.08	1.80929	8.17989e-117	7.76675e-117	yes	up
ENSG00000091409	7730	4752	101.7	75.35	-0.601858	8.28484e-117	7.86221e-117	no	down
ENSG00000254812	25.03	502	0.51	12.56	4.42603	8.36818e-117	7.93707e-117	yes	up
ENSG00000140598	913	163	17.56	4.47	-2.38567	8.66493e-117	8.21416e-117	yes	down
ENSG00000140548	1150.55	271.89	21.48	8.26	-1.98115	8.98852e-117	8.51639e-117	yes	down
ENSG00000118246	839	132	19.14	3.46	-2.56806	9.62464e-117	9.11425e-117	yes	down
ENSG00000117748	2628	1120	104.21	52.52	-1.13039	1.28271e-116	1.21405e-116	yes	down
ENSG00000186193	2143.19	820.46	33.87	15.59	-1.28518	1.6355e-116	1.54712e-116	yes	down
ENSG00000173141	964.15	186	27.87	6.45	-2.27388	1.78043e-116	1.68333e-116	yes	down
ENSG00000181381	1002	203	14.4	4.62	-2.20326	1.83707e-116	1.73596e-116	yes	down
ENSG00000100347	1817	629	71.76	29.8	-1.43035	2.35864e-116	2.22765e-116	yes	down
ENSG00000178974	695	77	13.25	1.64	-3.07401	2.75516e-116	2.60076e-116	yes	down
ENSG00000164051	670	68.04	31.41	4.52	-3.19963	2.80336e-116	2.64486e-116	yes	down
ENSG00000133812	1317.88	356.95	15.44	4.55	-1.78435	3.59109e-116	3.38626e-116	yes	down
ENSG00000244257	2027.08	752.48	20.25	9.28	-1.3296	3.73456e-116	3.51969e-116	yes	down
ENSG00000139211	829	129	16.9	2.92	-2.58393	3.76059e-116	3.54235e-116	yes	down
ENSG00000272333	2011	743	23.3	8.68	-1.3364	3.85191e-116	3.62645e-116	yes	down
ENSG00000196367	5055.06	2779	21.07	12.91	-0.763087	4.02548e-116	3.78786e-116	no	down
ENSG00000184990	2289	911	279.43	133.77	-1.22912	4.62288e-116	4.3477e-116	yes	down
ENSG00000169967	1591	503	13.25	6.64	-1.56123	5.30799e-116	4.98939e-116	yes	down
ENSG00000187713	907.07	162.3	40.75	8.72	-2.38248	7.2889e-116	6.8478e-116	yes	down
ENSG00000107816	2570	1088	60.11	27.74	-1.14001	1.26252e-115	1.18549e-115	yes	down
ENSG00000179958	1063	233	65.84	17.33	-2.08966	1.28252e-115	1.20363e-115	yes	down
ENSG00000079739	4729	2550	122.42	79.21	-0.790963	1.34207e-115	1.25886e-115	no	down
ENSG00000204264	1295.89	347.43	81.44	26.58	-1.79907	1.51705e-115	1.42224e-115	yes	down
ENSG00000132669	836	133	12.49	2.89	-2.552	1.54582e-115	1.44845e-115	yes	down
ENSG00000115419	5230.42	2909.77	116.04	73.2	-0.745946	1.65276e-115	1.54784e-115	no	down
ENSG00000168234	1398.93	401.18	45.12	14.16	-1.70193	1.88952e-115	1.76864e-115	yes	down
ENSG00000168028	22372.1	16539.2	1464.93	1296.04	-0.335733	1.89408e-115	1.77199e-115	no	down
ENSG00000120253	1280.77	340	24.06	8.38	-1.81333	1.91542e-115	1.791e-115	yes	down
ENSG00000141698	2040	763	117.43	48.77	-1.31874	1.94149e-115	1.81443e-115	yes	down
ENSG00000117899	2053	771	33.13	14.8	-1.31286	2.24193e-115	2.09411e-115	yes	down
ENSG00000266338	945.59	180.1	16.36	3.67	-2.29234	2.24808e-115	2.09876e-115	yes	down
ENSG00000161714	3447.6	1663.24	77.01	42.03	-0.951521	2.32688e-115	2.17118e-115	no	down
ENSG00000171451	1065.07	234.71	6.45	1.71	-2.08192	2.66261e-115	2.48315e-115	yes	down
ENSG00000141448	607.68	48	10.07	1.01	-3.56213	2.68216e-115	2.50008e-115	yes	down
ENSG00000108788	1065.71	235.25	36.32	8.01	-2.07947	3.37097e-115	3.14048e-115	yes	down
ENSG00000136280	1035	221.01	39.06	9.1	-2.12737	3.64093e-115	3.3902e-115	yes	down
ENSG00000050030	555	31	2.66	0.18	-4.06207	3.74474e-115	3.48505e-115	yes	down
ENSG00000143776	3902	1974	25.42	15.41	-0.883017	3.78601e-115	3.52161e-115	no	down
ENSG00000173546	1086.41	245.28	7.61	2.07	-2.04699	4.3644e-115	4.0575e-115	yes	down
ENSG00000052126	573	36.92	8.84	1.79	-3.85599	4.60151e-115	4.2757e-115	yes	down
ENSG00000235823	217.95	929.2	7.16	75.03	2.19207	4.69206e-115	4.35757e-115	yes	up
ENSG00000165525	1323.09	363.19	29.95	9.39	-1.76504	6.58502e-115	6.1124e-115	yes	down
ENSG00000132359	828	131	8.04	1.58	-2.55999	7.65003e-115	7.09728e-115	yes	down
ENSG00000103540	1395	401	18.22	6.76	-1.69852	8.22268e-115	7.62458e-115	yes	down
ENSG00000181915	912	167	15.38	3.38	-2.34911	1.36063e-114	1.261e-114	yes	down
ENSG00000137040	589	43	7.91	0.68	-3.67578	2.0355e-114	1.88548e-114	yes	down
ENSG00000155975	810.58	1885.79	31.61	72.44	1.31822	2.51172e-114	2.3254e-114	yes	up
ENSG00000166477	913	168	28.02	5.99	-2.34208	2.57506e-114	2.3828e-114	yes	down
ENSG00000103423	3427	1656	86.22	50.4	-0.949168	3.23264e-114	2.98973e-114	no	down
ENSG00000157741	978	197.17	4.18	1.07	-2.21032	3.66332e-114	3.38629e-114	yes	down
ENSG00000115392	743.03	98.53	37.35	7.66	-2.81471	4.50597e-114	4.16305e-114	yes	down
ENSG00000122644	635	59	26.28	3.04	-3.32789	4.51746e-114	4.17151e-114	yes	down
ENSG00000159231	722.8	90.92	47.2	7.07	-2.89085	5.27337e-114	4.86701e-114	yes	down
ENSG00000107021	1874	671	41.03	16.92	-1.38166	6.39638e-114	5.90042e-114	yes	down
ENSG00000139631	1537.02	480.19	62.44	21.25	-1.57838	6.71795e-114	6.19385e-114	yes	down
ENSG00000105127	1260	334	26.94	8.15	-1.81543	8.81747e-114	8.12537e-114	yes	down
ENSG00000108312	2866	1287	49.95	29.77	-1.05495	9.36029e-114	8.62113e-114	yes	down
ENSG00000135837	2203	869	18.48	7.68	-1.24197	1.3883e-113	1.27801e-113	yes	down
ENSG00000268460	72.01	612.05	2.21	20.62	3.18746	1.63894e-113	1.50796e-113	yes	up
ENSG00000225630	639.23	61.3	48.89	5.57	-3.2823	1.70089e-113	1.56415e-113	yes	down
ENSG00000163935	1544.31	486	20.96	8.28	-1.56786	2.43005e-113	2.23354e-113	yes	down
ENSG00000123240	3493	1706	79.26	48.66	-0.933774	2.73094e-113	2.50881e-113	no	down
ENSG00000114796	391	1228.96	6.64	41.32	1.75227	2.80324e-113	2.57389e-113	yes	up
ENSG00000038358	8754.61	5571.28	191.07	115.26	-0.551959	2.85928e-113	2.624e-113	no	down
ENSG00000106682	14375	17298	363.17	534.76	0.367118	3.47498e-113	3.18739e-113	no	up
ENSG00000265241	3452.67	5255.73	247.62	450.94	0.706254	4.18149e-113	3.83346e-113	no	up
ENSG00000198920	584	1538	9.57	31.21	1.49709	4.69633e-113	4.30323e-113	yes	up
ENSG00000105137	2059	784	45.29	23.07	-1.29294	4.77892e-113	4.37666e-113	yes	down
ENSG00000127054	2727.36	1201	116.55	63.39	-1.08319	5.00903e-113	4.58505e-113	yes	down
ENSG00000131711	586	44	3.07	0.33	-3.63525	6.12677e-113	5.60529e-113	yes	down
ENSG00000104228	592	46	8.77	0.79	-3.58582	6.22786e-113	5.69486e-113	yes	down
ENSG00000196642	7986.74	4986.3	177.85	132.01	-0.579562	7.54963e-113	6.89997e-113	no	down
ENSG00000172315	723	93	14.15	2.06	-2.85862	8.81673e-113	8.0539e-113	yes	down
ENSG00000161847	2143.65	3654.06	41.25	80.72	0.869506	1.22869e-112	1.12181e-112	no	up
ENSG00000213983	1602.63	520.75	81.2	24.29	-1.5217	1.34494e-112	1.22731e-112	yes	down
ENSG00000144824	1471	449	18.11	7.75	-1.61193	2.11042e-112	1.92486e-112	yes	down
ENSG00000116688	6741.7	9020.17	102.04	165.69	0.520117	2.5139e-112	2.2917e-112	no	up
ENSG00000065183	1539.69	487	20.19	6.39	-1.56057	2.95489e-112	2.69233e-112	yes	down
ENSG00000070087	2327	952	81.79	38.86	-1.18936	4.42577e-112	4.03046e-112	yes	down
ENSG00000260852	52	556	0.8	10.27	3.51858	4.68298e-112	4.26251e-112	yes	up
ENSG00000134802	1554.36	496	45.53	19.78	-1.54783	5.56173e-112	5.05978e-112	yes	down
ENSG00000145916	841.7	142.13	25.92	3.93	-2.46602	5.76114e-112	5.23852e-112	yes	down
ENSG00000028839	230	937.98	17.9	86.78	2.128	5.79184e-112	5.26375e-112	yes	up
ENSG00000177551	640	64	8.77	0.91	-3.22185	7.82802e-112	7.11065e-112	yes	down
ENSG00000186866	1408.97	2698.73	35.77	77.33	1.03771	8.65264e-112	7.85569e-112	yes	up
ENSG00000112996	1836	657	63.65	27.53	-1.38253	9.37262e-112	8.50503e-112	yes	down
ENSG00000170234	700	86	15.97	3.19	-2.92487	9.76018e-112	8.8522e-112	yes	down
ENSG00000135365	1229	324	25.92	6.52	-1.82334	1.10856e-111	1.00492e-111	yes	down
ENSG00000135766	1527	482	23.82	7.49	-1.56352	1.19676e-111	1.08432e-111	yes	down
ENSG00000158480	603	1559	9.08	28.91	1.47047	1.31032e-111	1.18661e-111	yes	up
ENSG00000170322	1380	403	18.63	6.22	-1.67574	1.74186e-111	1.57661e-111	yes	down
ENSG00000130638	4822.54	2646.82	159.87	103.79	-0.765458	1.85714e-111	1.68009e-111	no	down
ENSG00000164916	1497.76	466.86	8.52	4.12	-1.58167	2.27288e-111	2.05516e-111	yes	down
ENSG00000139263	483	11	7.32	0.2	-5.35637	2.47757e-111	2.23911e-111	yes	down
ENSG00000101361	5606	3216	261.56	156.77	-0.701629	2.67708e-111	2.41819e-111	no	down
ENSG00000167074	1367	397	18.72	6.54	-1.68373	3.45953e-111	3.12339e-111	yes	down
ENSG00000174243	3790	1922	83.75	45.45	-0.879514	3.67448e-111	3.31577e-111	no	down
ENSG00000074416	3587.01	1783.01	51.42	31.23	-0.908392	4.11529e-111	3.71167e-111	no	down
ENSG00000237945	858.95	151.32	11.75	3.18	-2.4049	5.20268e-111	4.69004e-111	yes	down
ENSG00000101266	3368.43	5133.71	56.32	106.97	0.708001	5.37694e-111	4.84468e-111	no	up
ENSG00000134222	590	48	25.83	2.36	-3.51953	5.54936e-111	4.9975e-111	yes	down
ENSG00000175166	12155	14896	437.19	755.45	0.39345	5.79907e-111	5.21975e-111	no	up
ENSG00000100911	3647	1825	335.36	208.42	-0.898739	5.89877e-111	5.30681e-111	no	down
ENSG00000165699	1211	2426	13.85	28.4	1.10246	6.40445e-111	5.75883e-111	yes	up
ENSG00000151239	4629	6607.91	111.5	168.97	0.613569	7.05094e-111	6.33695e-111	no	up
ENSG00000182108	842.64	144.84	40.12	7.76	-2.44038	8.97657e-111	8.06352e-111	yes	down
ENSG00000159842	1844	665.48	37.98	18.27	-1.3703	9.45231e-111	8.4866e-111	yes	down
ENSG00000132199	1879.95	686.78	52.9	30.02	-1.3527	1.05587e-110	9.47521e-111	yes	down
ENSG00000005469	770	115	19.18	3.79	-2.64315	1.09455e-110	9.81735e-111	yes	down
ENSG00000111596	1695.37	579.99	63.95	28.79	-1.44743	1.29369e-110	1.15976e-110	yes	down
ENSG00000140474	1335	382	41.7	14.65	-1.70512	1.50062e-110	1.34459e-110	yes	down
ENSG00000008516	29.28	489.67	1.25	11.77	4.1639	1.54977e-110	1.38793e-110	yes	up
ENSG00000134440	3632	5441	131.53	194.86	0.683183	1.70934e-110	1.53008e-110	no	up
ENSG00000136891	746	1767	14.61	43.03	1.34413	1.89345e-110	1.69403e-110	yes	up
ENSG00000186298	4199	2212	119.3	76.44	-0.824619	2.33171e-110	2.08508e-110	no	down
ENSG00000066777	1180	303	14.28	3.8	-1.86132	2.63513e-110	2.35523e-110	yes	down
ENSG00000147677	2399	3950.03	113.72	263.19	0.819506	4.26667e-110	3.81155e-110	no	up
ENSG00000126775	976.57	2096	11.94	30.63	1.20192	4.65683e-110	4.15801e-110	yes	up
ENSG00000183914	992	213	9.93	3.39	-2.11941	5.98958e-110	5.34532e-110	yes	down
ENSG00000109686	899	171	12.04	3.24	-2.29425	6.78659e-110	6.05358e-110	yes	down
[truncated: 56,235 more rows]
